# Supplementary material for: Hybrid Sequencing in Different Types of Goat Skeletal Muscles Reveals Genes Regulating Muscle Development and Meat Quality
Source: MDPI journal article supplement (doi:10.3390/ani11102906), 2021-10-08

Figure S1 KOG annotation of all novel isoforms

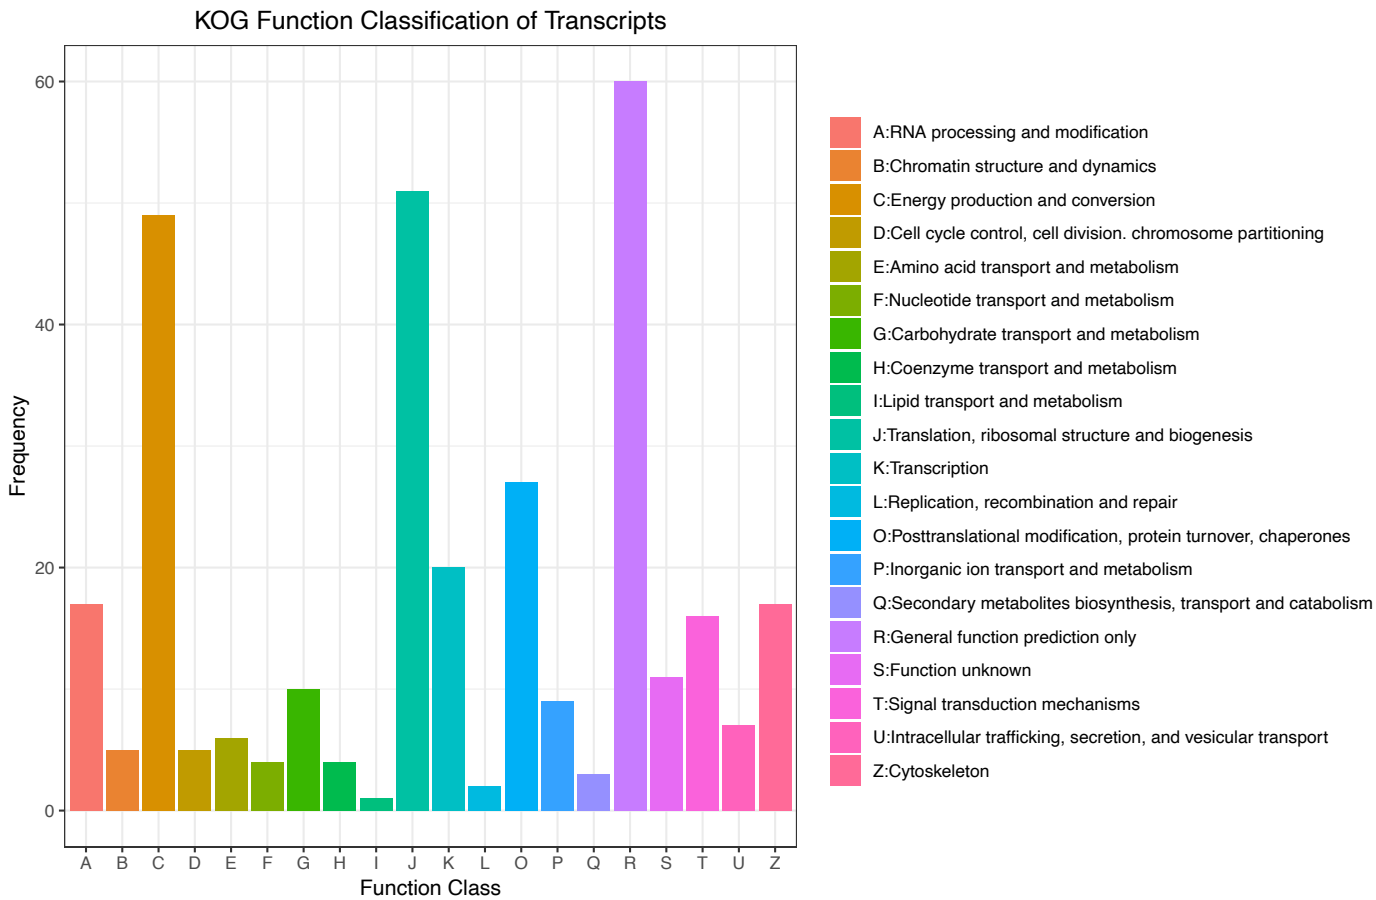

Figure S2 GO enrichment of all novel isoforms

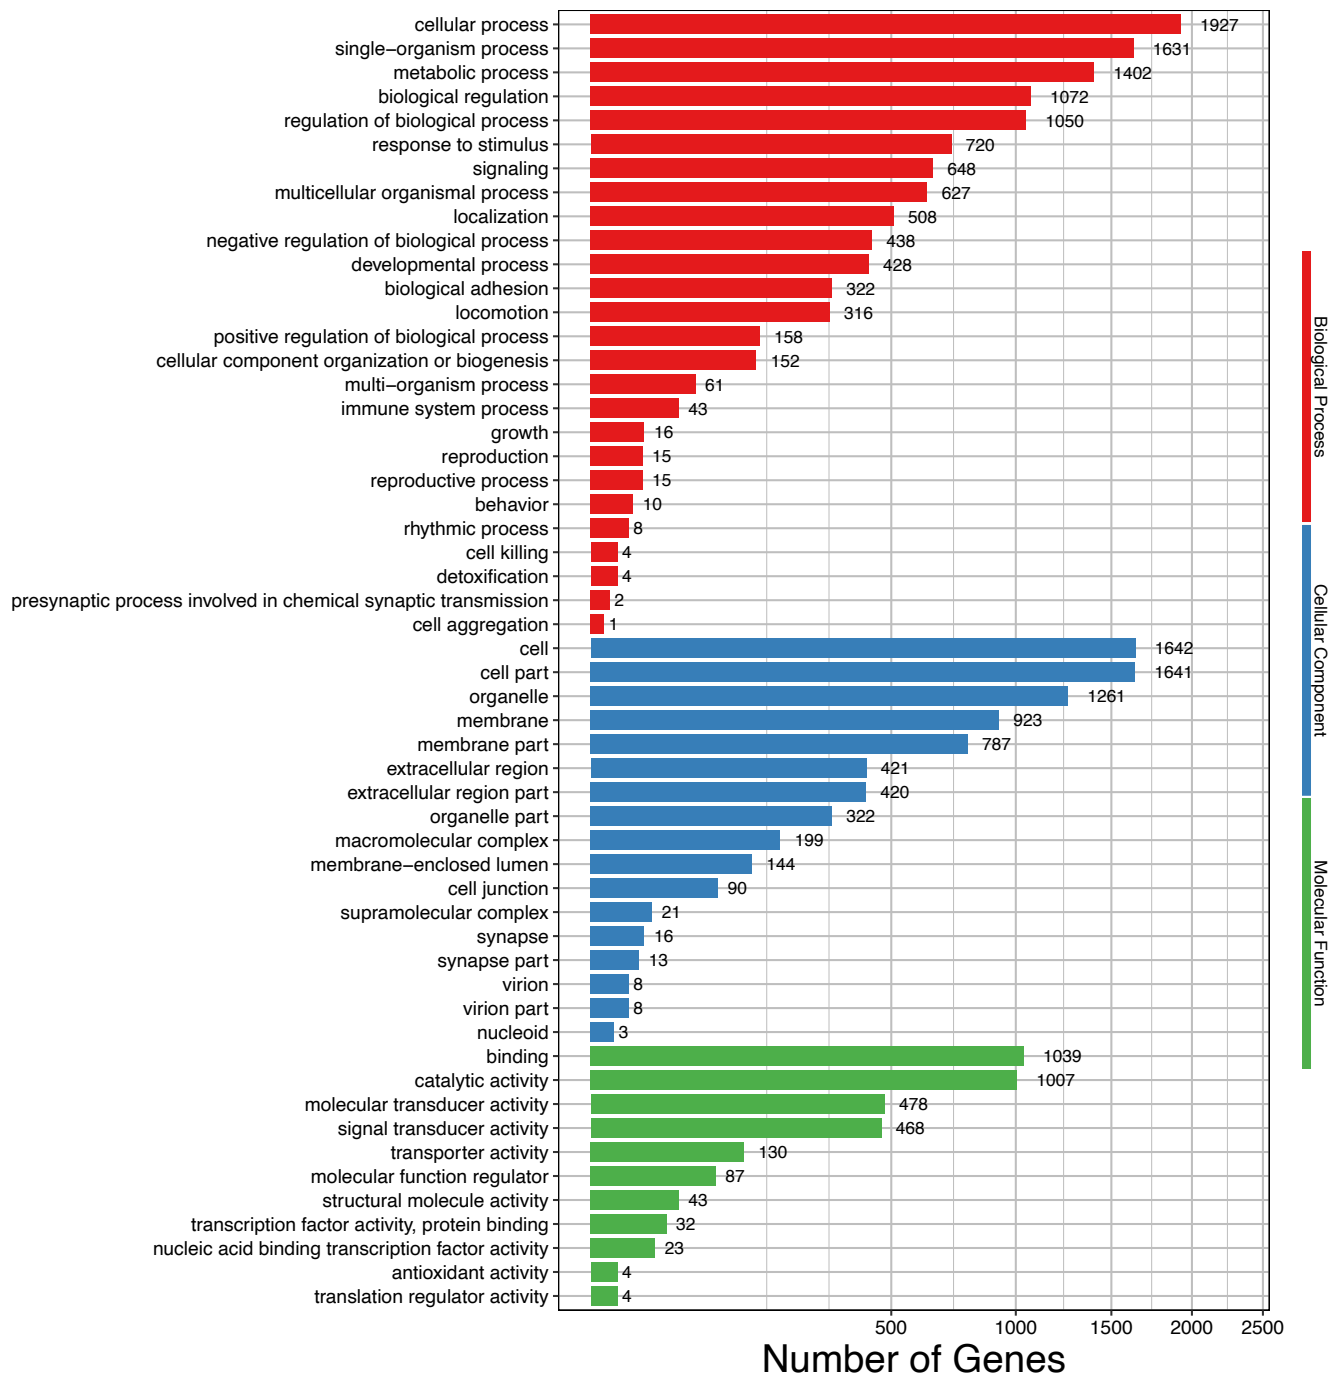

Figure S3 KEGG pathway of all novel isoforms

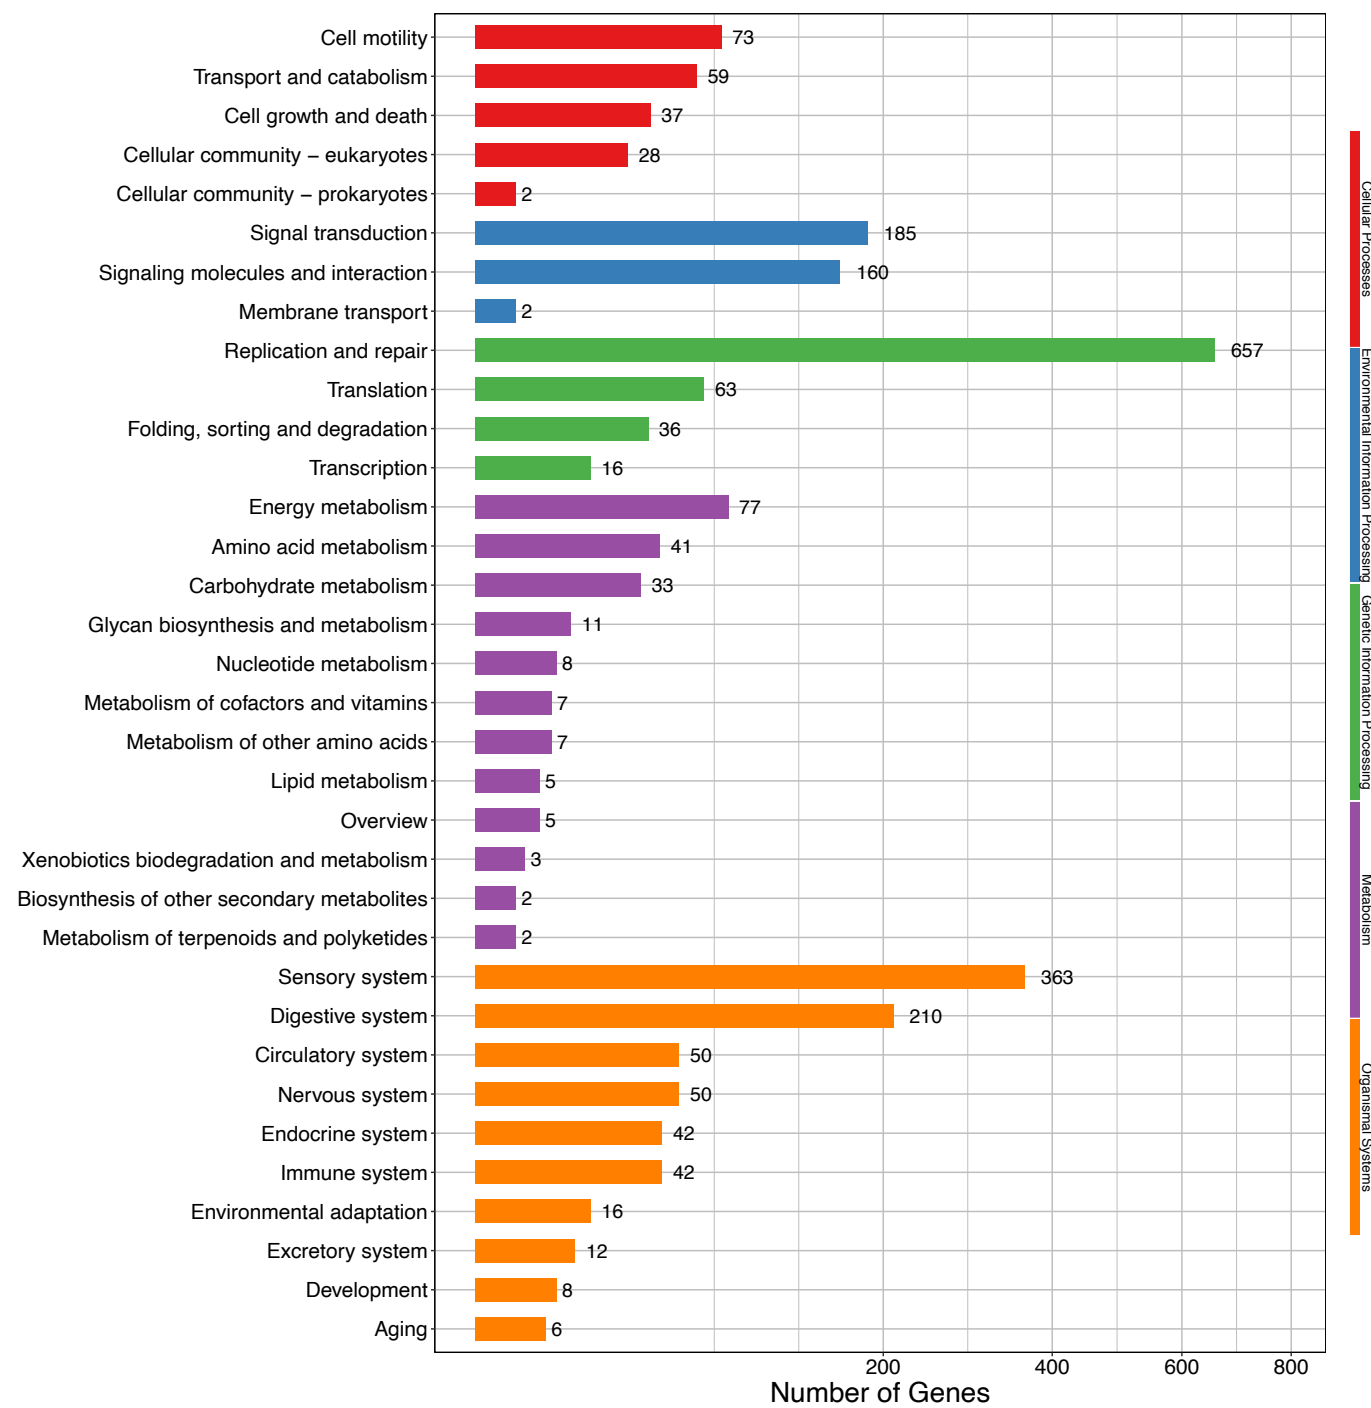

Supplement: s1 [file s1]
