# Supplementary material for: Hybrid Sequencing in Different Types of Goat Skeletal Muscles Reveals Genes Regulating Muscle Development and Meat Quality
Source: Animals (Basel). 2021 Oct 8;11(10):2906. doi: 10.3390/ani11102906 (PMC8532877; doi:10.3390/ani11102906)
Supplement: Supplementary file 1 [file animals-11-02906-s001.zip]

Archive with 4 entries (4 files):
- Supplimentary tables.xlsx
- __MACOSX/._Supplimentary tables.xlsx
- Supplementary figures.pdf
- __MACOSX/._Supplementary figures.pdf
