# Supplementary material for: Hybrid Sequencing in Different Types of Goat Skeletal Muscles Reveals Genes Regulating Muscle Development and Meat Quality
Source: Animals (Basel). 2021 Oct 8;11(10):2906. doi: 10.3390/ani11102906 (PMC8532877; doi:10.3390/ani11102906)
Supplement: Supplementary file 1 [file animals-11-02906-s001.zip › Supplimentary tables.xlsx]

## Sheet: Table S1
Table S1. Composition level of diets (air-dry matter basis, %)
Dietary ingredient
Corn, %	29
Soybean meal, %, 44% crude protein	13.3
Wheat bran, %	3
Wheat shorts, %	5
Oil cake of flax seed, %	4.7
Mineral vitamin premix, %	4
Naked oats straw, %	25
Potato rattan, %	15
Limestone, %	0.5
Sodium Chloride, %	0.5
Total, %	100

## Sheet: Table S2
Table S2. qPCR primers used in the present study
Gene	Primer (5’ - 3’)	Product length (bp)	Reference
FABP3	AGCTGTCCTTGAGCCTTGAA	203	XM_005676734.1
	AGCAAAACCGACACCGAGT
LMCD1	AGCAGCAGTCAGCAAGAGGT	191	XM_005695648.1
	TGTGAGCGTGGAATACTTGG
MYL12A	CCTCAGCTCTGAAGGATGGATT	107	XM_005697074.1
	ATGGCGAACACATTGGAGGT
MYL2	AGTGCTGTGTCCTTTCCACC	127	XM_005691447.1
	ATGATGGTGAAGGCCTCCTTA
MYO7	CCGAGTCCCAGGTCAACAAG	70	XM_005702091.1
	TACTCCTCATTCAAGCCCTTGGC
TNNC1	ACAGGGGAGACCATCACAGA	100	XM_005695877.1
	TGAACTCCAGGAACTCATCGT
TNNI1	GCCGGAAGTCGAGAGAAAACC	83	XM_005701381.1
	CCCAGCACTCCTTGGCTCTA
TNNT1	AGGACGACGCCAAGAAGAAG	83	XM_005709565.1
	TCGCTTCTGTTCTGCCTTGA
TPM3	TGGCCACTGCCCTGCAAAAG	198	XM_005677459.1
	TAATCACCAACTTGCGAGCCACC
ANKRD1	CAACGCCAAAGACCGGGAAG	96	XM_005698203.1
	TCGGCGCCATACGTAATCAG
MYBPH	CATCCTCTTCATCCGCTCA	205	XM_005690370.1
	CTCTGTGTTGCCTGTGTCCT
PFKFB3	TCTGTGTGCGATGACCCTAC	248	XM_005687842.1
	ATGCGGCTCTGGATGTGA
TPM1	TCCAGCTGAAAGAGGCCAAG	140	XM_005685683.1
	CTCGGCACATTTGCCTTCTG
GAPDH	GCAAGTTCCACGGCACAG	249	XM_005680968.1
	GGTTCACGCCCATCACAA

## Sheet: Table S3
Table S3. Slaughter performance of goat individuals used in the present study
Item	Individual				Mean ± SEM
	1	2	3	4
Body weight (kg)	26.5	27	31.3	27	27.95 ± 1.24
Carcass weight (kg)	11.65	11.48	14.57	11.53	12.31 ± 0.88
Carcass/live (%)	43.1	42.54	46.55	42.72	43.73 ± 1.13
Fur (kg)	2.18	2.12	2.9	2.6	2.45 ± 0.20
Head (kg)	1.96	1.94	2.12	2.25	2.07 ± 0.08
Feet (kg)	0.69	0.72	0.77	0.73	0.73 ± 0.01
Blood (kg)	0.9	1.04	1.13	0.86	0.98 ± 0.07
Internal organ (kg)	9.12	9.69	9.81	9.03	9.41 ± 0.21
Bone (kg)	1.4	1.41	2.37	1.9	1.77 ± 0.24
Rib thickness (mm)	8.47	8.49	8.79	8.48	8.56 ± 0.09
Lion eye (cm2)	5.05	2.7	7.44	4.36	4.89 ± 1.20

## Sheet: Table S4
Table S4. Reads yielding of short-read sequencing
Sample	Clean Reads Pairs	Clean base (bp)	Length (bp)	Q20 (%)	Q30 (%)	GC (%)
BF1	24515714	4412828520	90;90	98.7;97.1	96.1;92.9	52.5;52.4
BF2	24445164	4400129520	90;90	98.0;95.7	94.6;90.8	51.4;51.1
BF3	24534648	4416236640	90;90	98.7;96.1	96.1;91.3	51.8;51.7
BF4	24497388	4409529840	90;90	98.7;95.8	96.1;91.0	51.0;50.9
LD1	24486884	4407639120	90;90	98.8;97.2	96.3;93.1	52.1;52.0
LD2	24508539	4411537020	90;90	98.8;96.9	96.2;92.6	52.0;51.9
LD3	24522517	4414053060	90;90	98.9;97.4	96.4;93.4	52.5;52.4
LD4	24507643	4411375740	90;90	97.7;96.8	93.6;92.1	53.4;53.2

## Sheet: Table S5
Table S5. Short reads that mapped to the reference genome
Sample	Total Read pairs	Total mapped ratio	Unique mapped reads ratio	Multiple mapped reads ratio	Discordantly reads ratio
BF1	24515714	0.9424	0.82	0.09	0.04
BF2	24445164	0.924	0.78	0.1	0.05
BF3	24534648	0.9262	0.78	0.1	0.05
BF4	24497388	0.9281	0.77	0.11	0.05
LD1	24486884	0.9397	0.83	0.07	0.04
LD2	24508539	0.9406	0.83	0.07	0.04
LD3	24522517	0.9429	0.84	0.07	0.04
LD4	24507643	0.9376	0.76	0.14	0.04

## Sheet: Table S6
Table S6. Short reads that mapped to the combined transcriptome
Sample	Total Read pairs	Total mapped reads	Unique mapped reads	Multiple mapped reads
BF1	24515714	21,276,993 (86.79%)	2,189,739 (8.93%)	19,087,254 (77.86%)
BF2	24445164	20,589,078 (84.23%)	2,128,067 (8.71%)	18,461,011 (75.52%)
BF3	24534648	20,791,071 (84.74%)	2,154,441 (8.78%)	18,636,630 (75.96%)
BF4	24497388	20,873,996 (85.21%)	2,171,590 (8.86%)	18,702,406 (76.34%)
LD1	24486884	20,980,306 (85.68%)	2,267,562 (9.26%)	18,712,744 (76.42%)
LD2	24508539	21,102,713 (86.10%)	2,325,041(9.49%)	18,777,672 (76.62%)
LD3	24522517	21,187,147 (86.40%)	2,152,349 (8.78%)	19,034,798 (77.62%)
LD4	24507643	20,464,865 (83.50%)	2,176,641 (8.88%)	18,288,224 (74.62%)

## Sheet: Table S7
Table S7. LncRNAs identified in the full-length sequencing
ID	mRNA_size	ORF_size	Fickett_score	Hexamer_score	coding_prob
NC_005044.2.8.5	987	147	0.9416	-0.159589	0.00935244
NC_030808.1.106.1	2902	174	0.7741	-0.238721	0.00392748
NC_030808.1.133.1	4061	273	0.5773	-0.112509	0.0131141
NC_030808.1.134.1	2752	138	0.88	-0.50753	0.000637063
NC_030808.1.135.1	2850	225	0.828	-0.00888162	0.0357632
NC_030808.1.136.1	3116	222	0.7886	-0.0618651	0.0215284
NC_030808.1.138.1	3361	222	1.0094	-0.270187	0.0108446
NC_030808.1.139.1	1598	222	0.6114	0.0583627	0.0296728
NC_030808.1.140.1	2863	138	0.8475	-0.11739	0.00745805
NC_030808.1.147.1	1684	156	0.8815	-0.370157	0.00205211
NC_030808.1.159.1	1626	171	0.9663	-0.070231	0.0224348
NC_030808.1.191.1	2853	189	0.5741	-0.110883	0.00573727
NC_030808.1.207.1	1720	120	0.905	-0.159195	0.00599069
NC_030808.1.210.1	1105	168	0.8084	-0.341476	0.00232374
NC_030808.1.221.1	2765	483	0.6228	-0.141629	0.117013
NC_030808.1.222.1	4409	114	1.1984	-0.0815169	0.0197439
NC_030808.1.223.1	3766	159	0.8351	-0.256997	0.00340375
NC_030808.1.224.1	2674	126	0.8632	-0.550875	0.000400669
NC_030808.1.23.1	765	105	0.9041	0.0484616	0.0208871
NC_030808.1.230.1	3159	321	0.627	-0.204382	0.0148094
NC_030808.1.232.1	4145	282	0.5617	-0.112989	0.0136422
NC_030808.1.232.2	3018	282	0.5617	-0.112989	0.0145943
NC_030808.1.237.1	1778	126	0.7604	-0.400275	0.000827532
NC_030808.1.238.1	552	81	1.0423	-0.121634	0.00830226
NC_030808.1.239.1	3759	225	0.4194	-0.327638	0.00118363
NC_030808.1.242.1	2513	219	0.7246	-0.155631	0.00963557
NC_030808.1.243.1	2877	222	0.7084	-0.233472	0.00555704
NC_030808.1.244.1	1570	243	0.7999	-0.293	0.00678485
NC_030808.1.270.3	3805	144	0.4135	-0.188185	0.00121192
NC_030808.1.283.1	4440	240	0.5163	-0.364218	0.00142206
NC_030808.1.296.1	2923	204	0.7939	-0.0408007	0.0209636
NC_030808.1.306.1	1645	207	0.6878	-0.11038	0.0107027
NC_030808.1.335.1	437	78	1.0302	0.352344	0.152265
NC_030808.1.34.1	787	105	0.6312	-0.195031	0.00180761
NC_030808.1.340.1	2334	240	0.6885	-0.061263	0.0201329
NC_030808.1.35.1	2848	135	0.7812	-0.489187	0.00050746
NC_030808.1.361.1	4423	207	0.5866	-0.347002	0.00139227
NC_030808.1.372.1	2914	204	0.847	-0.212083	0.00810384
NC_030808.1.377.1	655	93	0.6235	-0.327683	0.000651436
NC_030808.1.38.1	1874	156	0.3268	-0.493422	0.000157637
NC_030808.1.380.1	678	177	0.565	-0.375325	0.000979726
NC_030808.1.387.1	1995	216	0.909	-0.108154	0.0231859
NC_030808.1.39.1	2890	234	0.371	-0.360433	0.000951505
NC_030808.1.405.1	3875	198	0.8708	-0.206263	0.00802376
NC_030808.1.407.1	1944	174	0.6541	-0.477564	0.000591865
NC_030808.1.410.1	1834	156	1.1101	-0.255918	0.00880635
NC_030808.1.44.1	2669	225	0.6449	-0.312126	0.00284066
NC_030808.1.445.1	1841	240	1.0035	0.0510093	0.106773
NC_030808.1.449.1	715	198	0.9364	0.0320738	0.0549037
NC_030808.1.459.1	1629	171	0.7756	0.0516672	0.027412
NC_030808.1.469.1	1521	123	0.9371	-0.342744	0.00207021
NC_030808.1.471.1	3244	168	0.7377	-0.102948	0.00784974
NC_030808.1.477.1	1642	252	0.6292	-0.0258112	0.0249515
NC_030808.1.482.1	617	57	1.0138	-0.119591	0.00592652
NC_030808.1.483.1	2910	174	0.8011	0.026742	0.0241559
NC_030808.1.490.1	626	78	0.6919	-0.089137	0.00331426
NC_030808.1.509.1	769	159	0.6227	-0.303296	0.00154601
NC_030808.1.522.1	3587	159	0.5358	-0.426396	0.000440378
NC_030808.1.530.1	613	42	1.0316	-0.0904753	0.00645678
NC_030808.1.535.1	4299	321	0.6533	-0.207535	0.0147018
NC_030808.1.537.1	3120	276	0.5129	-0.529901	0.000753938
NC_030808.1.55.1	4050	216	0.6578	-0.37157	0.0016688
NC_030808.1.559.1	1613	126	0.8769	-0.112479	0.00800209
NC_030808.1.574.1	1636	126	0.7669	-0.264651	0.00208326
NC_030808.1.58.1	3005	204	0.5136	-0.25308	0.00216966
NC_030808.1.59.1	4311	234	0.6151	-0.321144	0.0024324
NC_030808.1.590.1	820	351	0.6386	-0.3631	0.00863993
NC_030808.1.592.1	860	69	0.7426	-0.468089	0.000285659
NC_030808.1.597.1	773	165	0.7888	-0.545366	0.000562656
NC_030808.1.598.1	2746	87	0.5485	-0.310376	0.000476344
NC_030808.1.610.1	2861	306	0.7694	-0.275773	0.0125477
NC_030808.1.626.1	488	84	0.3482	-0.316394	0.000270953
NC_030808.1.640.1	2679	231	0.7775	-0.227516	0.0079915
NC_030808.1.642.1	1522	111	0.9782	-0.224734	0.00449828
NC_030808.1.643.1	3107	408	0.4045	-0.293102	0.0105748
NC_030808.1.648.1	1739	186	0.6521	-0.364669	0.00142757
NC_030808.1.65.1	2158	198	0.7326	-0.187954	0.00651979
NC_030808.1.654.1	3782	246	0.6597	-0.126339	0.0117945
NC_030808.1.661.1	499	102	0.8573	-0.286453	0.00198114
NC_030808.1.671.1	2099	93	0.9779	-0.211024	0.00391266
NC_030808.1.683.1	2850	162	0.7172	-0.185045	0.00412402
NC_030808.1.699.1	2768	186	0.8807	-0.369925	0.00265333
NC_030808.1.701.1	3115	174	0.6184	-0.238757	0.00238017
NC_030808.1.711.1	2737	168	0.6939	-0.358287	0.00131567
NC_030808.1.724.2	2189	210	0.71	-0.117832	0.010916
NC_030808.1.732.1	2997	210	0.6008	-0.0515411	0.0114186
NC_030808.1.733.1	2755	249	0.4833	-0.182378	0.00518029
NC_030808.1.734.1	577	108	0.9784	-0.319303	0.00247666
NC_030808.1.736.1	2112	285	0.9131	-0.122887	0.0436784
NC_030808.1.77.1	4470	300	0.4666	-0.104491	0.0127592
NC_030808.1.77.2	2754	333	0.6903	-0.134961	0.0327358
NC_030808.1.770.1	789	162	0.5776	-0.24143	0.00208157
NC_030808.1.776.1	4200	216	0.6586	-0.244575	0.00382604
NC_030808.1.777.1	658	237	0.6038	-0.397047	0.00183504
NC_030808.1.78.1	3781	264	0.5469	-0.102547	0.0117636
NC_030808.1.781.1	1088	273	0.58	0.274608	0.17137
NC_030808.1.784.1	2252	180	0.4534	-0.305915	0.00102426
NC_030808.1.785.1	3248	207	0.6396	-0.183247	0.00518713
NC_030808.1.786.1	2998	210	0.5522	-0.125635	0.00604183
NC_030808.1.799.1	3211	180	0.7362	-0.28636	0.00266912
NC_030808.1.802.1	1884	186	0.9494	-0.374087	0.00337749
NC_030808.1.803.1	3169	171	0.8964	-0.175845	0.00828428
NC_030808.1.804.1	2079	129	0.7703	-0.268918	0.00205855
NC_030808.1.811.1	2800	279	0.4572	-0.350681	0.00217337
NC_030808.1.815.1	3619	198	0.658	-0.530628	0.000494256
NC_030808.1.82.1	4168	237	0.6488	-0.22677	0.00523918
NC_030808.1.828.1	1412	279	0.496	-0.165655	0.009
NC_030808.1.83.1	980	207	0.8313	-0.0487546	0.0258722
NC_030808.1.840.1	2122	138	0.6164	-0.29677	0.00116202
NC_030808.1.841.1	1626	153	0.3625	-0.326897	0.00052019
NC_030808.1.858.1	1997	435	0.5253	-0.0787335	0.0843675
NC_030808.1.859.1	1709	291	0.778	0.16356	0.177975
NC_030808.1.86.1	2829	243	0.9008	0.087726	0.0969177
NC_030808.1.88.1	3718	195	1.0301	-0.238805	0.0104098
NC_030808.1.891.1	2821	234	0.7131	-0.162251	0.0102621
NC_030808.1.93.1	3657	168	0.367	-0.361649	0.000436078
NC_030809.1.112.1	379	114	0.7539	-0.0792394	0.00642041
NC_030809.1.118.1	1397	108	0.9776	-0.125791	0.008384
NC_030809.1.157.1	3719	162	0.4016	-0.355768	0.000471864
NC_030809.1.166.1	2851	174	0.9761	-0.255641	0.00662824
NC_030809.1.172.1	2740	189	0.482	-0.143292	0.0034999
NC_030809.1.177.1	1317	117	0.9026	-0.00514229	0.0161442
NC_030809.1.187.1	2964	174	0.7552	-0.419414	0.00112147
NC_030809.1.191.1	3713	144	0.4709	-0.458593	0.000245063
NC_030809.1.220.1	1044	141	0.9105	-0.0591147	0.0152863
NC_030809.1.227.1	1662	177	0.5966	-0.242715	0.00244279
NC_030809.1.228.1	3823	114	1.0717	-0.0108968	0.0218555
NC_030809.1.24.1	3712	249	0.985	-0.196125	0.021243
NC_030809.1.241.1	4205	156	0.3895	-0.184944	0.00127582
NC_030809.1.246.1	635	171	0.83	-0.242662	0.00506162
NC_030809.1.259.1	3297	324	0.5913	-0.0582766	0.0348567
NC_030809.1.270.1	2866	171	0.6462	-0.30083	0.00169563
NC_030809.1.276.1	2029	132	0.8559	-0.297061	0.00231718
NC_030809.1.277.1	2659	132	0.5345	-0.347904	0.000581774
NC_030809.1.281.1	2984	162	0.3974	-0.281658	0.000794021
NC_030809.1.284.1	2983	162	0.7444	-0.220423	0.00352976
NC_030809.1.285.1	1739	114	0.7382	-0.338613	0.00102071
NC_030809.1.288.1	2637	321	0.4863	-0.138311	0.0151914
NC_030809.1.289.1	795	102	1.0198	-0.163713	0.00725259
NC_030809.1.313.1	1650	204	0.5769	-0.20585	0.00391888
NC_030809.1.314.1	1626	189	0.8042	-0.264369	0.00462824
NC_030809.1.316.1	1053	159	0.3502	-0.318665	0.000583763
NC_030809.1.32.1	394	90	0.7879	-0.235477	0.00197158
NC_030809.1.328.1	2016	114	0.7263	-0.481612	0.000376358
NC_030809.1.333.1	2589	243	0.8549	0.0554778	0.0707969
NC_030809.1.357.2	1186	93	0.7997	-0.181749	0.00286937
NC_030809.1.358.1	2707	324	0.6242	-0.155135	0.0214291
NC_030809.1.361.1	1225	162	0.8259	-0.28178	0.00338407
NC_030809.1.363.1	2838	204	0.8175	-0.606763	0.000552111
NC_030809.1.377.1	2767	210	0.7717	-0.169361	0.00912107
NC_030809.1.402.1	4559	294	0.5224	-0.131979	0.0118313
NC_030809.1.406.1	1179	222	0.7561	-0.0669533	0.0211505
NC_030809.1.435.1	1638	144	0.6393	-0.336385	0.00105645
NC_030809.1.438.1	2588	165	0.8373	-0.261878	0.00380212
NC_030809.1.446.1	3082	249	0.9648	0.0666438	0.107115
NC_030809.1.462.1	648	96	0.8468	-0.34668	0.0011971
NC_030809.1.49.1	999	357	0.7066	-0.00101464	0.110625
NC_030809.1.527.1	1907	219	0.4504	-0.240116	0.00243556
NC_030809.1.530.1	2228	177	0.6812	-0.238887	0.00315549
NC_030809.1.531.1	3777	186	0.5876	-0.242832	0.00230049
NC_030809.1.533.1	2471	297	0.7676	-0.405788	0.00495057
NC_030809.1.555.1	3850	309	0.6685	0.0851742	0.0889035
NC_030809.1.565.1	3040	225	0.8018	-0.224103	0.00808794
NC_030809.1.565.2	2713	225	0.8018	-0.224103	0.00824879
NC_030809.1.565.3	2676	225	0.8018	-0.224103	0.00826719
NC_030809.1.566.1	676	234	0.4273	-0.302054	0.00190808
NC_030809.1.577.1	3005	405	0.662	-0.108725	0.0732027
NC_030809.1.603.1	1637	138	0.7389	-0.268726	0.00211424
NC_030809.1.606.1	2630	129	0.814	-0.423046	0.000826515
NC_030809.1.611.1	2827	216	0.467	-0.397271	0.000833628
NC_030809.1.623.1	2889	168	0.6531	-0.466984	0.000559907
NC_030809.1.625.1	3066	201	0.7729	-0.272443	0.00415083
NC_030809.1.63.1	2746	240	0.4043	-0.167341	0.0040564
NC_030809.1.648.1	1204	207	0.6168	-0.282366	0.00284788
NC_030809.1.652.1	4601	294	0.4827	-0.361511	0.00231077
NC_030809.1.653.1	446	141	0.8996	-0.233844	0.00488362
NC_030809.1.670.1	1657	108	0.7585	-0.298712	0.00133311
NC_030809.1.683.1	2813	177	0.9664	-0.0698824	0.0223344
NC_030809.1.693.1	2280	129	0.7217	-0.0839925	0.0058956
NC_030809.1.694.1	1030	195	0.8569	-0.0864749	0.0192697
NC_030809.1.709.1	4177	276	0.8238	0.0302726	0.0705496
NC_030809.1.71.1	1587	138	0.4262	-0.431524	0.000271504
NC_030809.1.727.1	791	183	0.6968	-0.409049	0.00125697
NC_030809.1.728.1	2084	174	0.6756	-0.318968	0.00178693
NC_030809.1.729.1	3743	174	0.5564	-0.161454	0.0031389
NC_030809.1.730.1	2223	345	0.6979	-0.549934	0.00262516
NC_030809.1.733.1	2154	240	0.6476	-0.319414	0.00331141
NC_030809.1.737.1	2853	123	0.8833	-0.345963	0.00157928
NC_030809.1.746.1	825	240	0.6808	-0.13459	0.0133636
NC_030809.1.747.1	1573	456	0.8383	-0.104909	0.210646
NC_030809.1.748.1	874	132	0.7641	-0.412477	0.000870636
NC_030809.1.754.1	1630	354	0.6319	-0.0230181	0.0734335
NC_030809.1.755.1	3123	183	0.4686	-0.0822469	0.00459266
NC_030809.1.758.1	3312	165	0.6305	0.0468567	0.014433
NC_030809.1.761.1	3739	219	0.6345	-0.192253	0.00531478
NC_030809.1.770.1	2123	312	0.3896	-0.0479669	0.0189811
NC_030809.1.774.1	651	111	0.6283	-0.101277	0.00357248
NC_030809.1.808.1	3651	375	0.6801	0.00185996	0.10764
NC_030809.1.809.1	2831	198	0.5095	-0.182449	0.00323057
NC_030809.1.819.1	1738	174	0.8243	-0.0703193	0.0148388
NC_030809.1.833.1	2937	168	0.6395	-0.384373	0.000922606
NC_030809.1.846.1	3148	171	0.76	-0.167277	0.00573284
NC_030809.1.848.1	1870	147	0.9594	-0.364051	0.0024472
NC_030809.1.850.1	2920	201	0.4013	-0.325011	0.000923842
NC_030809.1.856.1	796	108	0.9533	-0.309164	0.00241514
NC_030809.1.864.1	540	231	0.8718	-0.103455	0.0272232
NC_030809.1.96.1	678	63	0.6505	-0.620674	7.4e-05
NC_030809.1.97.1	706	87	0.6462	-0.238144	0.0011799
NC_030809.1.98.1	1785	171	0.6783	-0.274581	0.00238017
NC_030810.1.1001.1	2926	120	0.9944	-0.38005	0.00172284
NC_030810.1.1002.1	1268	117	0.9595	-0.16577	0.00676836
NC_030810.1.1003.1	3195	246	0.9108	0.0778847	0.0948936
NC_030810.1.1009.1	1137	168	0.6317	-0.347877	0.00127741
NC_030810.1.1010.1	1940	201	0.4604	-0.0219372	0.00866444
NC_030810.1.1017.1	2791	147	0.6499	-0.147981	0.00364001
NC_030810.1.1022.1	1292	144	0.9228	-0.280115	0.00380166
NC_030810.1.123.1	2302	147	0.5653	-0.0652538	0.00495673
NC_030810.1.124.1	2774	126	0.4408	-0.227423	0.000893355
NC_030810.1.125.1	1303	117	0.9681	-0.37687	0.00173055
NC_030810.1.148.1	1415	192	0.6841	-0.209162	0.00477993
NC_030810.1.154.1	1980	234	0.6489	-0.085139	0.014622
NC_030810.1.157.1	2598	165	0.9572	-0.150538	0.0114624
NC_030810.1.159.1	2059	216	0.6877	-0.17715	0.00742467
NC_030810.1.165.1	501	252	0.8217	0.0107256	0.0600746
NC_030810.1.168.1	1744	147	0.6045	-0.30204	0.00121917
NC_030810.1.169.1	2565	195	0.7057	-0.120831	0.00879388
NC_030810.1.17.1	610	222	0.7052	0.138524	0.0689173
NC_030810.1.170.1	1776	159	0.7274	-0.183902	0.00443218
NC_030810.1.177.1	3071	213	0.5574	-0.372205	0.00124595
NC_030810.1.179.1	384	111	0.8793	-0.101199	0.00795825
NC_030810.1.182.1	2635	390	0.7005	-0.0429997	0.106853
NC_030810.1.183.1	3566	210	0.4782	-0.415291	0.00068705
NC_030810.1.186.1	3462	351	0.5302	-0.145315	0.021758
NC_030810.1.200.1	3323	204	0.7764	-0.266341	0.00444214
NC_030810.1.201.1	2269	216	0.7512	-0.489323	0.00114657
NC_030810.1.217.1	2849	183	0.5451	-0.0951098	0.00545028
NC_030810.1.242.1	2016	147	0.8262	-0.100655	0.00902514
NC_030810.1.243.1	2826	135	0.4545	-0.50078	0.000168693
NC_030810.1.248.1	3327	168	0.5589	-0.409446	0.000592924
NC_030810.1.25.1	3456	267	0.4476	-0.19643	0.0049147
NC_030810.1.250.1	1930	132	1.0066	-0.106973	0.0129896
NC_030810.1.255.1	2304	138	0.8451	-0.114623	0.00779607
NC_030810.1.27.1	3249	336	0.7412	-0.262875	0.0168196
NC_030810.1.273.1	2806	264	0.5784	-0.181067	0.00823438
NC_030810.1.278.1	2015	333	0.7661	0.00490964	0.101608
NC_030810.1.282.1	3772	165	0.4731	-0.726105	5.28e-05
NC_030810.1.283.1	3826	165	0.7328	-0.136024	0.00581809
NC_030810.1.285.1	3774	195	0.8442	-0.0769595	0.0167337
NC_030810.1.286.1	3127	180	0.6078	-0.411989	0.000783375
NC_030810.1.289.1	2107	198	0.5713	-0.3075	0.00179784
NC_030810.1.290.1	2974	156	0.3674	-0.184697	0.0012847
NC_030810.1.295.1	1642	177	0.6564	-0.159418	0.00510155
NC_030810.1.299.2	1662	279	0.4866	0.0286484	0.0303739
NC_030810.1.307.1	4136	312	0.7614	-0.214183	0.0180458
NC_030810.1.320.1	647	234	0.449	-0.263407	0.00263919
NC_030810.1.358.1	2837	366	0.618	-0.313056	0.0116897
NC_030810.1.377.1	3016	132	0.9229	-0.0692117	0.0120076
NC_030810.1.39.1	2106	207	0.457	-0.248758	0.00203893
NC_030810.1.392.1	1214	258	0.5035	-0.0248822	0.0186423
NC_030810.1.424.1	4193	201	0.8759	-0.237867	0.00671411
NC_030810.1.444.1	3113	276	0.5915	-0.199589	0.00848276
NC_030810.1.445.1	3783	213	0.5044	-0.0917781	0.0064011
NC_030810.1.464.1	1834	303	0.8284	0.0113246	0.0949406
NC_030810.1.474.1	3245	165	0.7824	-0.0288401	0.0141729
NC_030810.1.492.1	2780	147	0.7096	-0.142653	0.0045471
NC_030810.1.503.1	3318	213	0.7092	-0.10426	0.0114803
NC_030810.1.503.2	3177	213	0.7092	-0.10426	0.0115779
NC_030810.1.503.3	1604	195	0.8257	-0.0595834	0.0201322
NC_030810.1.503.4	1608	195	0.8257	-0.0595834	0.0201274
NC_030810.1.503.5	1545	195	0.8257	-0.0595834	0.020203
NC_030810.1.517.1	1634	231	0.7328	-0.180386	0.0100789
NC_030810.1.560.1	3046	165	0.6009	-0.210891	0.00246692
NC_030810.1.583.1	1938	150	0.6364	-0.225462	0.00227868
NC_030810.1.584.1	2916	270	0.7383	-0.0153498	0.041629
NC_030810.1.612.1	1373	246	0.6487	-0.257238	0.00559203
NC_030810.1.614.1	2661	117	0.4748	-0.508571	0.000142004
NC_030810.1.620.1	2951	261	0.6537	-0.0975937	0.0172137
NC_030810.1.645.1	1574	237	0.7347	-0.315917	0.00446268
NC_030810.1.646.1	2982	267	0.4845	-0.176992	0.00644783
NC_030810.1.647.1	983	300	0.4842	-0.39124	0.00253535
NC_030810.1.660.1	3986	291	0.6843	-0.108535	0.02277
NC_030810.1.663.1	1837	231	0.6339	-0.148608	0.00900948
NC_030810.1.674.1	2856	252	0.855	-0.0571933	0.0377965
NC_030810.1.678.1	2655	207	0.9092	-0.472111	0.00186894
NC_030810.1.681.1	4128	288	0.6731	-0.354007	0.00425143
NC_030810.1.686.1	1973	270	0.5791	-0.215098	0.0074047
NC_030810.1.691.1	431	162	0.9095	0.163579	0.0806205
NC_030810.1.704.1	2746	201	0.5252	-0.365632	0.0010537
NC_030810.1.708.1	2618	303	0.6227	-0.334653	0.00530939
NC_030810.1.709.1	1661	165	0.6487	-0.452106	0.000635385
NC_030810.1.720.1	869	192	0.822	0.175892	0.0886838
NC_030810.1.732.1	2055	243	0.6275	-0.228871	0.0058586
NC_030810.1.733.2	2617	180	0.6776	-0.389695	0.00116526
NC_030810.1.737.1	1628	114	0.8623	-0.162	0.00485199
NC_030810.1.742.1	551	108	0.719	-0.0263086	0.00755976
NC_030810.1.766.1	1827	165	0.6503	-0.260456	0.0022371
NC_030810.1.771.1	880	141	0.6893	-0.262806	0.00203486
NC_030810.1.788.1	876	198	0.7459	-0.510038	0.000881249
NC_030810.1.79.1	3871	504	0.6919	-0.0131665	0.310912
NC_030810.1.797.1	853	90	0.4663	-0.306097	0.000438578
NC_030810.1.814.1	3839	288	0.55	-0.0351777	0.023651
NC_030810.1.830.1	3624	135	0.6541	-0.187279	0.00237896
NC_030810.1.848.1	1503	111	0.8022	-0.181154	0.00345786
NC_030810.1.858.1	899	231	0.7328	-0.274367	0.00569161
NC_030810.1.865.1	2437	222	0.5762	-0.181431	0.00531354
NC_030810.1.873.1	1574	156	0.5489	-0.45394	0.000418532
NC_030810.1.874.1	983	105	0.8917	0.0425553	0.0191014
NC_030810.1.927.1	539	75	0.7366	-0.162185	0.0022939
NC_030810.1.935.1	614	153	0.9363	0.0241916	0.0329756
NC_030810.1.958.1	2391	291	0.6508	-0.103007	0.0234035
NC_030810.1.992.1	3078	228	0.7397	-0.0500853	0.0213462
NC_030810.1.997.1	3213	252	0.6007	-0.0716118	0.0154758
NC_030811.1.119.1	1849	204	0.5408	-0.133206	0.00557486
NC_030811.1.13.1	1498	216	0.5475	0.198506	0.0561638
NC_030811.1.130.1	988	132	0.8187	0.0531737	0.0217458
NC_030811.1.138.1	523	63	1.0744	-0.16189	0.00581967
NC_030811.1.14.1	1038	102	0.7985	-0.0721025	0.006533
NC_030811.1.149.1	1666	207	0.7092	-0.191083	0.00673702
NC_030811.1.160.1	3382	204	0.7898	-0.366034	0.00239525
NC_030811.1.161.1	399	123	0.9059	-0.385973	0.00151117
NC_030811.1.180.1	864	84	0.6055	-0.439765	0.000263223
NC_030811.1.182.1	2232	234	0.7586	-0.316313	0.00446309
NC_030811.1.192.1	3063	228	0.7044	-0.40661	0.00185272
NC_030811.1.195.1	2593	249	0.5039	-0.253077	0.00350544
NC_030811.1.196.1	843	66	0.3678	-0.240626	0.000382799
NC_030811.1.214.1	3340	267	0.5419	-0.341298	0.00256366
NC_030811.1.223.1	619	222	0.6449	-0.000462725	0.0238671
NC_030811.1.224.1	927	219	0.5425	-0.318347	0.00206043
NC_030811.1.237.1	2935	264	0.6731	-0.306621	0.00481871
NC_030811.1.238.1	3146	153	0.3918	-0.63146	6.97e-05
NC_030811.1.253.1	1784	186	0.3611	-0.313954	0.000798043
NC_030811.1.254.1	1654	177	0.5376	-0.394633	0.000745966
NC_030811.1.258.1	3034	255	0.7394	-0.119527	0.0181611
NC_030811.1.266.1	838	105	0.6304	-0.456651	0.000319998
NC_030811.1.275.1	1187	120	0.6774	-0.206233	0.00222705
NC_030811.1.279.1	3268	195	0.5611	-0.192898	0.00334249
NC_030811.1.280.1	448	138	0.717	-0.139013	0.00498099
NC_030811.1.284.1	1555	135	0.8502	0.0742588	0.0273806
NC_030811.1.285.1	841	102	0.388	-0.0164292	0.00263939
NC_030811.1.288.1	1684	153	0.637	-0.301902	0.00144698
NC_030811.1.29.1	3012	411	0.5054	-0.119628	0.0457352
NC_030811.1.294.1	3235	207	0.9951	-0.191859	0.0148399
NC_030811.1.299.1	2188	183	0.4697	-0.299701	0.00116462
NC_030811.1.3.1	1954	141	1.0881	-0.454824	0.00187872
NC_030811.1.310.1	630	87	0.7864	-0.321397	0.00106288
NC_030811.1.312.1	4302	207	0.931	-0.182698	0.0121142
NC_030811.1.327.1	668	279	0.6289	-0.19781	0.0115317
NC_030811.1.342.1	4548	267	0.5348	-0.0533644	0.0153928
NC_030811.1.352.1	672	72	0.8892	-0.00131823	0.0102099
NC_030811.1.367.1	3841	183	0.7773	-0.263694	0.00350391
NC_030811.1.368.1	800	135	0.7349	-0.325916	0.00145875
NC_030811.1.369.1	1924	129	0.6091	-0.104358	0.00370535
NC_030811.1.379.1	543	105	0.8942	-0.0346105	0.0119663
NC_030811.1.40.1	1069	192	0.8236	0.0025383	0.0298435
NC_030811.1.403.1	4251	225	1.1764	-0.12428	0.0453585
NC_030811.1.41.1	2933	228	0.8009	0.0506012	0.0492924
NC_030811.1.410.1	4391	153	0.6635	-0.315624	0.00121897
NC_030811.1.413.1	1817	120	0.9118	-0.232924	0.00374771
NC_030811.1.417.1	1675	156	1.0269	-0.194419	0.0102604
NC_030811.1.418.1	3045	288	0.4533	-0.131849	0.00981193
NC_030811.1.420.1	2655	210	0.6187	-0.253506	0.0032772
NC_030811.1.421.1	1245	219	0.5868	-0.0240181	0.015991
NC_030811.1.427.1	3174	201	0.6917	-0.159507	0.00671738
NC_030811.1.435.1	3406	297	0.8872	-0.278901	0.015573
NC_030811.1.437.1	3484	201	0.6311	-0.316914	0.00193674
NC_030811.1.447.1	730	63	0.6768	-0.501722	0.000175762
NC_030811.1.448.1	2700	96	1.0295	-0.331747	0.002069
NC_030811.1.450.1	1627	165	0.6594	-0.122047	0.0057903
NC_030811.1.455.1	954	192	0.5979	-0.110891	0.00715648
NC_030811.1.457.1	3100	267	0.5054	-0.0682878	0.0139074
NC_030811.1.46.1	1973	342	0.49	-0.0727596	0.0304741
NC_030811.1.472.1	1757	165	0.6968	-0.218393	0.00342828
NC_030811.1.473.1	2760	159	0.5602	-0.29345	0.00120173
NC_030811.1.474.1	3966	222	0.9056	-0.233168	0.00964484
NC_030811.1.48.1	792	84	0.7993	-0.348039	0.000890043
NC_030811.1.492.1	2161	189	0.8423	-0.231832	0.00625007
NC_030811.1.497.1	1281	183	0.5016	-0.0931483	0.00529786
NC_030811.1.500.1	3563	201	0.8389	-0.0325315	0.0236816
NC_030811.1.501.1	2210	228	0.6903	-0.251145	0.00519268
NC_030811.1.504.1	2903	234	0.7776	-0.0293084	0.0294962
NC_030811.1.508.1	3061	204	0.5888	-0.187328	0.00421865
NC_030811.1.517.1	1278	186	0.8093	-0.136479	0.0107522
NC_030811.1.524.1	619	27	0.6066	-0.106212	0.00130804
NC_030811.1.533.1	3890	327	0.5991	0.0628071	0.075813
NC_030811.1.539.1	2682	255	0.5265	-0.0573246	0.014386
NC_030811.1.540.1	1786	180	0.7697	-0.150813	0.00787145
NC_030811.1.548.1	2984	147	0.9235	0.00834077	0.0233827
NC_030811.1.551.1	3418	141	0.6002	-0.416915	0.000477322
NC_030811.1.556.1	1165	186	0.6269	-0.269987	0.00254889
NC_030811.1.557.1	3660	189	0.6518	-0.228003	0.00322635
NC_030811.1.558.1	2809	408	0.4829	-0.290948	0.0139256
NC_030811.1.563.1	3006	129	0.5733	-0.272502	0.00102442
NC_030811.1.570.1	2641	267	0.6074	-0.135991	0.0126173
NC_030811.1.582.1	3986	303	0.4501	0.00701132	0.0265325
NC_030811.1.590.1	2900	255	0.7706	-0.317739	0.00552647
NC_030811.1.591.1	552	126	1.0521	-0.0840083	0.0176857
NC_030811.1.594.1	4511	321	0.4847	-0.17688	0.0105066
NC_030811.1.602.1	784	102	0.4103	-0.372257	0.000271745
NC_030811.1.606.1	1593	141	0.7998	-0.293146	0.00225641
NC_030811.1.619.1	3387	219	0.8321	-0.0345657	0.0279609
NC_030811.1.622.1	3372	360	0.5786	-0.0757391	0.0434567
NC_030811.1.632.1	1101	114	0.8436	-0.377965	0.00113935
NC_030811.1.64.1	3251	204	0.5801	-0.172731	0.00446723
NC_030811.1.643.1	1569	195	0.677	-0.186011	0.00556923
NC_030811.1.644.1	2545	153	0.7354	-0.238715	0.00283536
NC_030811.1.644.2	2998	153	0.7354	-0.238715	0.00275865
NC_030811.1.647.1	3755	357	0.6645	-0.0452348	0.0644072
NC_030811.1.660.1	2068	213	0.6128	-0.358979	0.00171894
NC_030811.1.69.1	1807	165	0.6537	-0.0818171	0.00732591
NC_030811.1.73.1	3021	132	0.7162	-0.154837	0.00359281
NC_030811.1.75.1	4412	285	0.6745	-0.338616	0.0044967
NC_030811.1.78.1	3060	156	0.4994	-0.457321	0.000320144
NC_030811.1.81.1	976	231	0.5921	-0.0973323	0.0116476
NC_030811.1.82.1	419	96	0.5903	-0.145433	0.00204577
NC_030811.1.85.1	3223	165	0.7512	0.0287774	0.0187354
NC_030811.1.89.1	1950	201	0.7838	-0.0291893	0.0224841
NC_030812.1.106.1	495	213	1.0309	0.0714282	0.107799
NC_030812.1.113.1	3027	162	0.791	-0.148042	0.00655239
NC_030812.1.116.1	567	69	0.933	-0.237576	0.00241784
NC_030812.1.118.1	4705	246	0.6021	-0.35512	0.00207484
NC_030812.1.120.1	1740	312	0.8523	-0.105079	0.0549302
NC_030812.1.121.1	1744	282	0.8291	-0.146843	0.0287926
NC_030812.1.122.1	1201	159	0.858	-0.134601	0.00953067
NC_030812.1.127.1	2716	186	0.701	-0.208167	0.00439563
NC_030812.1.129.1	3334	234	0.5549	-0.210119	0.00443747
NC_030812.1.135.1	657	264	0.9491	-0.31378	0.0124661
NC_030812.1.140.1	2814	294	0.588	-0.034266	0.0302397
NC_030812.1.154.1	2742	288	0.8236	-0.21944	0.0177973
NC_030812.1.156.1	3550	447	0.7219	-0.11926	0.119323
NC_030812.1.161.1	869	207	0.8495	-0.0358611	0.0299063
NC_030812.1.17.1	2291	198	1.1449	-0.218148	0.0191076
NC_030812.1.182.1	1236	225	0.4714	-0.276586	0.00227309
NC_030812.1.183.1	636	132	0.4647	-0.20111	0.0013913
NC_030812.1.187.1	3618	174	0.5599	-0.629676	0.000145736
NC_030812.1.189.1	784	108	0.7465	-0.22531	0.00219589
NC_030812.1.19.1	3708	282	0.4835	-0.288126	0.00348308
NC_030812.1.190.1	2827	156	0.8467	-0.303441	0.00266445
NC_030812.1.21.1	2862	120	0.7944	-0.358465	0.00106464
NC_030812.1.211.1	513	78	0.835	0.0627148	0.0141035
NC_030812.1.251.1	811	135	0.8585	-0.148808	0.00688371
NC_030812.1.259.1	1661	186	0.7522	0.0216323	0.0245887
NC_030812.1.26.1	3069	135	0.8974	-0.124961	0.00793015
NC_030812.1.260.1	2853	222	0.6538	-0.424269	0.00133574
NC_030812.1.271.1	932	288	0.9437	-0.105507	0.0588969
NC_030812.1.275.1	2630	231	0.817	-0.250404	0.0078032
NC_030812.1.278.1	1591	180	0.8398	0.0417746	0.0344573
NC_030812.1.279.1	509	129	0.7288	0.0187463	0.0131322
NC_030812.1.288.1	4019	192	0.6378	-0.0840309	0.00803443
NC_030812.1.292.1	2800	291	0.4762	-0.0792061	0.0155586
NC_030812.1.3.1	1248	186	0.5843	-0.188156	0.00380304
NC_030812.1.311.1	3153	219	0.5652	-0.201453	0.00417343
NC_030812.1.319.1	653	111	0.4168	-0.6256	5.79e-05
NC_030812.1.325.1	2851	210	0.8379	-0.175433	0.0107165
NC_030812.1.335.1	1685	171	0.5183	-0.405399	0.000611759
NC_030812.1.34.1	2826	180	0.5511	-0.189542	0.00289378
NC_030812.1.347.1	3009	204	0.6869	-0.122523	0.00879484
NC_030812.1.425.1	1700	219	0.5515	0.0896309	0.0290915
NC_030812.1.427.2	1142	147	0.8094	0.109603	0.0352239
NC_030812.1.443.1	658	153	0.5334	-0.580831	0.000176565
NC_030812.1.495.1	4094	207	0.824	-0.302029	0.0040193
NC_030812.1.498.1	569	114	0.7515	-0.0155002	0.00956461
NC_030812.1.499.1	2776	339	0.7589	0.11327	0.187247
NC_030812.1.509.1	3601	210	0.5095	0.0228403	0.0134735
NC_030812.1.512.1	1645	240	0.5856	-0.336201	0.00251793
NC_030812.1.526.1	3361	183	1.0124	-0.15742	0.015055
NC_030812.1.528.1	1920	108	0.9006	-0.427499	0.000876489
NC_030812.1.538.1	902	468	0.6989	-0.0202814	0.263125
NC_030812.1.589.1	1702	150	0.7552	-0.166888	0.00492961
NC_030812.1.595.1	2981	168	0.5312	-0.326456	0.000959693
NC_030812.1.603.1	2950	264	0.7221	0.0692035	0.063209
NC_030812.1.618.1	2833	252	0.5681	-0.287274	0.00348382
NC_030812.1.62.1	2876	300	0.5385	-0.0548654	0.0241666
NC_030812.1.620.1	644	111	0.8515	-0.0287747	0.0115379
NC_030812.1.621.1	3041	162	0.9473	-0.24129	0.00578445
NC_030812.1.624.1	1187	90	0.6053	-0.385647	0.000393394
NC_030812.1.626.1	579	99	1.0534	-0.0514638	0.0164353
NC_030812.1.698.1	3646	198	0.7596	-0.290906	0.0032964
NC_030812.1.708.1	672	180	0.9399	-0.0646083	0.0249638
NC_030812.1.710.1	2679	192	0.8553	-0.122958	0.0132786
NC_030812.1.715.1	594	126	1.0064	-0.176922	0.008353
NC_030812.1.722.1	750	87	0.7829	-0.221622	0.00201477
NC_030812.1.732.1	2373	219	0.8582	-0.0616981	0.0270103
NC_030812.1.739.1	2745	165	0.6141	-0.337442	0.00113713
NC_030812.1.767.1	626	153	0.4217	-0.273851	0.000944564
NC_030812.1.768.1	2116	186	0.6508	-0.321626	0.00184553
NC_030812.1.77.1	1867	168	0.8298	-0.0101549	0.02076
NC_030812.1.771.1	588	126	0.5614	-0.408137	0.000452108
NC_030812.1.782.1	1145	210	0.595	-0.332684	0.00197929
NC_030812.1.794.1	1186	291	0.5066	-0.177558	0.0099192
NC_030812.1.798.1	2849	366	0.3847	-0.165266	0.0148432
NC_030812.1.80.1	684	168	0.7126	-0.127217	0.00722432
NC_030812.1.832.1	2004	453	0.7224	0.06321	0.346651
NC_030812.1.834.1	2964	228	0.7496	-0.208328	0.00790699
NC_030812.1.888.1	1731	228	0.9887	-0.115558	0.0325006
NC_030812.1.893.1	1560	216	0.7009	0.045125	0.0336939
NC_030812.1.90.1	642	186	0.6963	-0.405911	0.00133542
NC_030812.1.904.1	1975	354	0.8868	0.00946817	0.176436
NC_030813.1.10.1	787	216	1.0293	0.0754589	0.111339
NC_030813.1.100.1	608	327	0.6266	-0.0657521	0.0446268
NC_030813.1.11.1	1073	135	0.7953	-0.0429723	0.0111247
NC_030813.1.122.1	1652	141	0.481	-0.617281	9.74e-05
NC_030813.1.138.1	660	33	0.8905	-0.700094	6.74e-05
NC_030813.1.149.1	1444	255	0.7877	-0.0216967	0.0432755
NC_030813.1.152.1	2684	192	0.915	-0.526088	0.00113204
NC_030813.1.154.1	2926	156	0.5108	-0.38754	0.000530194
NC_030813.1.159.1	2813	303	0.4357	-0.143817	0.0102279
NC_030813.1.169.1	2854	174	0.7081	-0.430107	0.000907514
NC_030813.1.17.1	2936	144	0.3711	-0.165847	0.00129584
NC_030813.1.197.1	515	66	0.7356	-0.354549	0.000584443
NC_030813.1.207.1	1724	141	0.7582	-0.455269	0.000674549
NC_030813.1.209.1	2011	177	0.941	-0.246877	0.00683562
NC_030813.1.210.1	1724	195	0.5029	-0.0579974	0.00741997
NC_030813.1.25.1	606	186	0.6771	-0.24157	0.0037202
NC_030813.1.28.1	2874	312	0.6846	-0.0209762	0.0528666
NC_030813.1.29.1	3742	261	0.5934	-0.315658	0.00326269
NC_030813.1.311.1	1164	120	1.1068	-0.24051	0.006823
NC_030813.1.313.1	4221	369	0.8726	0.07619	0.246203
NC_030813.1.315.1	2607	180	0.5229	-0.118036	0.0042972
NC_030813.1.317.1	1991	210	0.9082	-0.0162023	0.0391362
NC_030813.1.33.1	1460	180	1.1236	-0.138409	0.0260085
NC_030813.1.331.1	3503	249	0.6175	-0.260439	0.00451035
NC_030813.1.335.1	3966	159	0.5713	-0.107623	0.00393374
NC_030813.1.347.1	3826	273	0.5858	-0.0821986	0.0166301
NC_030813.1.349.1	1638	150	0.8177	-0.25242	0.00342913
NC_030813.1.350.1	3999	306	0.6251	-0.239616	0.00947715
NC_030813.1.351.1	2781	216	0.4229	-0.36778	0.000884198
NC_030813.1.356.1	991	252	1.1401	0.0141902	0.147205
NC_030813.1.368.1	1992	198	0.6491	-0.386241	0.00137513
NC_030813.1.372.1	4128	204	0.7213	0.0432507	0.0268543
NC_030813.1.392.1	971	141	0.8791	-0.141954	0.00810962
NC_030813.1.400.1	1464	234	0.9748	-0.0397228	0.0544056
NC_030813.1.401.1	3577	516	0.6105	-0.093381	0.192533
NC_030813.1.439.1	3505	138	0.7978	-0.0538586	0.00931611
NC_030813.1.449.1	2075	174	0.8389	-0.107955	0.0119072
NC_030813.1.450.1	3182	243	0.7104	-0.259538	0.00579812
NC_030813.1.470.1	1468	135	0.7542	-0.352618	0.00124804
NC_030813.1.481.1	3729	219	0.6312	-0.264818	0.00326637
NC_030813.1.485.1	3708	294	0.5458	-0.197673	0.00871761
NC_030813.1.497.1	578	72	0.999	-0.0668347	0.00941481
NC_030813.1.517.1	2952	153	0.7212	-0.173029	0.00407668
NC_030813.1.530.1	1900	321	0.8026	-0.250974	0.0202922
NC_030813.1.532.1	582	117	0.4657	-0.158691	0.00157518
NC_030813.1.57.1	2709	144	0.6383	-0.247022	0.00177897
NC_030813.1.60.1	1881	141	0.8599	-0.333158	0.00205678
NC_030813.1.66.1	1636	192	0.5744	-0.2664	0.00229542
NC_030813.1.68.1	1643	117	0.5984	-0.271071	0.0010676
NC_030813.1.70.1	2115	186	0.7106	-0.065191	0.0119844
NC_030813.1.73.1	2983	243	0.5035	-0.384694	0.00134673
NC_030813.1.78.1	1982	249	0.6605	-0.139928	0.0124472
NC_030813.1.79.1	1786	150	0.3636	-0.341973	0.000453062
NC_030813.1.80.1	2920	243	1.0214	-0.143889	0.0326794
NC_030813.1.86.1	1624	258	0.3863	-0.262403	0.00266508
NC_030813.1.89.1	1127	207	0.4517	-0.536204	0.000319528
NC_030813.1.98.1	925	240	0.8094	0.116485	0.0956887
NC_030814.1.104.1	3185	162	0.4793	-0.109261	0.00315928
NC_030814.1.108.1	3418	306	0.5746	-0.304991	0.00546246
NC_030814.1.129.1	1603	261	0.7504	-0.161986	0.0165584
NC_030814.1.13.1	2892	162	0.6357	-0.182502	0.00324101
NC_030814.1.137.1	1294	171	0.6266	-0.415404	0.000823927
NC_030814.1.141.1	1014	126	0.682	-0.174002	0.00301175
NC_030814.1.144.1	678	120	0.7897	-0.33466	0.00140118
NC_030814.1.170.1	3157	174	0.4183	-0.208491	0.00154742
NC_030814.1.174.1	3676	324	0.6423	-0.337276	0.00652298
NC_030814.1.182.1	1559	363	0.8434	0.0621365	0.230279
NC_030814.1.185.1	3535	222	0.7891	0.227106	0.126466
NC_030814.1.185.2	2728	222	0.7891	0.227106	0.131979
NC_030814.1.197.1	941	135	0.7884	-0.457144	0.000719948
NC_030814.1.200.1	2630	150	0.7574	-0.102356	0.00716811
NC_030814.1.210.1	2921	303	0.7818	-0.32232	0.00928494
NC_030814.1.215.1	2078	369	0.4936	-0.0671582	0.0420435
NC_030814.1.265.1	2780	252	0.7924	-0.195809	0.0128145
NC_030814.1.275.1	2596	129	0.9738	-0.256675	0.004091
NC_030814.1.30.1	3318	246	1.0613	-0.00612285	0.0874994
NC_030814.1.31.1	3107	132	0.7538	-0.229689	0.00245661
NC_030814.1.334.1	2630	204	1.1551	-0.164711	0.0290508
NC_030814.1.345.1	4122	543	0.5188	-0.176625	0.117892
NC_030814.1.355.1	920	117	0.866	-0.538372	0.00044303
NC_030814.1.37.1	778	75	0.7282	0.0753248	0.0104778
NC_030814.1.381.1	2902	357	0.5558	-0.0927522	0.0362839
NC_030814.1.4.1	2782	258	1.0502	-0.118151	0.0494158
NC_030814.1.406.1	2690	249	0.6953	0.0807202	0.054652
NC_030814.1.407.2	2965	228	0.8856	-0.00564545	0.0445052
NC_030814.1.456.1	3137	234	0.6207	-0.0399514	0.0167741
NC_030814.1.466.1	3139	177	0.6837	-0.195416	0.0040062
NC_030814.1.481.1	3179	180	0.4736	-0.25504	0.00144288
NC_030814.1.482.1	3926	219	0.8854	-0.0074293	0.0378812
NC_030814.1.483.1	1584	165	0.7222	-0.296363	0.00224511
NC_030814.1.484.1	1289	147	0.5845	-0.274552	0.00141094
NC_030814.1.485.1	3592	174	0.3566	-0.553413	0.000127506
NC_030814.1.485.2	3589	174	0.3566	-0.553413	0.000127529
NC_030814.1.486.1	2810	360	0.6892	0.0991574	0.174338
NC_030814.1.487.1	3538	312	0.5444	-0.132954	0.0162096
NC_030814.1.490.1	2270	240	0.6694	-0.207211	0.00735639
NC_030814.1.502.1	3116	270	0.4798	-0.171949	0.0067281
NC_030814.1.509.1	2976	168	0.6121	-0.240797	0.00217643
NC_030814.1.510.1	2833	399	0.552	-0.265007	0.0185168
NC_030814.1.512.1	3644	207	0.7413	-0.227795	0.00519416
NC_030814.1.517.1	2930	225	0.9672	-0.137684	0.0238385
NC_030814.1.534.1	3896	210	0.9099	-0.232956	0.0086439
NC_030814.1.535.1	578	117	0.6943	0.045841	0.012335
NC_030814.1.536.1	3123	261	0.5192	-0.270386	0.00361668
NC_030814.1.539.1	3801	174	0.6985	-0.139734	0.00562783
NC_030814.1.543.1	1802	204	0.7912	-0.142979	0.0114435
NC_030814.1.546.1	2156	174	0.7993	-0.326228	0.00249963
NC_030814.1.55.1	2098	159	0.8764	-0.0148505	0.0208431
NC_030814.1.559.1	2864	330	0.7475	-0.257485	0.0170509
NC_030814.1.560.1	2963	162	0.9688	-0.404616	0.00212291
NC_030814.1.568.1	665	153	0.5483	0.278327	0.0510421
NC_030814.1.570.1	722	129	0.9398	-0.0831522	0.0128405
NC_030814.1.579.1	1939	216	0.6805	-0.199236	0.00632658
NC_030814.1.581.1	1681	168	0.9779	-0.168911	0.0118289
NC_030814.1.583.1	3756	138	0.5942	-0.276612	0.00112111
NC_030814.1.586.1	3792	222	0.7128	-0.26153	0.00443359
NC_030814.1.590.1	1626	189	0.6371	-0.0642324	0.0102055
NC_030814.1.612.1	600	183	0.6532	-0.123183	0.00727671
NC_030814.1.628.1	3154	156	1.0418	-0.170196	0.0115187
NC_030814.1.63.1	3660	285	0.513	-0.330046	0.00300316
NC_030814.1.631.1	1566	198	0.8033	-0.36135	0.00269641
NC_030814.1.633.1	2821	189	0.7124	-0.404282	0.00128501
NC_030814.1.635.1	1646	330	0.6879	-0.184483	0.0244667
NC_030814.1.655.1	3884	270	0.5764	-0.104929	0.0134486
NC_030814.1.656.1	3266	132	0.808	-0.260185	0.00235885
NC_030814.1.657.1	2731	291	0.4439	-0.362909	0.00219825
NC_030814.1.677.1	2784	225	0.5888	-0.0958771	0.00979201
NC_030814.1.687.1	3209	240	0.8637	-0.0922249	0.0268012
NC_030814.1.695.1	3404	291	0.9742	0.0928906	0.184947
NC_030814.1.748.1	1962	129	0.712	-0.703177	9.83e-05
NC_030814.1.753.1	1326	147	0.8712	-0.26155	0.00376703
NC_030814.1.759.1	2701	165	0.7463	-0.191534	0.00451097
NC_030814.1.774.1	3055	249	0.8169	-0.252458	0.00909888
NC_030814.1.83.1	1512	156	0.8998	-0.216974	0.00601473
NC_030814.1.84.1	1652	246	0.45	-0.172358	0.00516006
NC_030814.1.877.1	827	300	0.5077	0.0415212	0.0459005
NC_030814.1.89.1	1879	138	1.0631	0.0783089	0.054078
NC_030814.1.892.1	1834	162	0.406	-0.167172	0.00186083
NC_030814.1.896.1	1629	561	0.6748	-0.166039	0.24852
NC_030814.1.925.2	1666	420	0.85	-0.147865	0.123169
NC_030814.1.942.1	1939	123	0.7039	-0.271004	0.00155852
NC_030814.1.943.1	2413	342	0.5703	-0.261499	0.011201
NC_030814.1.960.1	2306	273	1.0475	-0.0560367	0.085951
NC_030815.1.103.1	2857	270	0.588	-0.17184	0.00958135
NC_030815.1.128.1	1684	102	0.7147	-0.619091	0.000131244
NC_030815.1.139.1	2895	234	0.6858	-6.71e-05	0.0268981
NC_030815.1.156.1	2963	408	0.8802	-0.091576	0.15385
NC_030815.1.167.1	2181	528	0.4914	-0.0784769	0.183182
NC_030815.1.173.1	1503	177	0.6522	-0.238319	0.00302204
NC_030815.1.180.1	1788	240	0.839	-0.278655	0.00804711
NC_030815.1.19.1	3060	279	0.5178	-0.066645	0.016637
NC_030815.1.200.1	2384	159	0.7372	-0.131507	0.00621467
NC_030815.1.22.1	1567	144	0.8386	-0.0903616	0.00998214
NC_030815.1.220.1	1413	105	0.613	-0.619792	9.97e-05
NC_030815.1.238.1	1539	132	0.8703	-0.214775	0.00429159
NC_030815.1.243.1	2634	249	0.4663	-0.171372	0.00531918
NC_030815.1.26.1	1956	171	0.7508	-0.0324489	0.0144554
NC_030815.1.264.1	3666	153	1.0993	-0.072026	0.0244373
NC_030815.1.27.1	2727	93	0.9301	-0.235419	0.0027621
NC_030815.1.278.1	4027	306	0.6205	-0.047494	0.0323885
NC_030815.1.280.1	694	198	0.7018	-0.0638086	0.0145631
NC_030815.1.29.1	1788	174	0.8601	-0.0386616	0.0202907
NC_030815.1.297.1	2988	243	0.4892	0.00378018	0.0164785
NC_030815.1.303.1	1639	240	0.8194	-0.0128692	0.0426125
NC_030815.1.31.1	2905	342	0.6206	0.0499325	0.0914454
NC_030815.1.346.1	3691	243	0.7744	-0.033588	0.0298171
NC_030815.1.350.1	3380	225	0.6087	-0.113253	0.00897108
NC_030815.1.357.1	3412	270	0.5295	-0.327333	0.0027802
NC_030815.1.362.1	3940	306	0.9596	0.0366879	0.14548
NC_030815.1.365.1	1946	156	0.5975	-0.346247	0.000970053
NC_030815.1.366.1	695	66	0.7914	-1.02696	8.13e-06
NC_030815.1.380.1	3595	237	0.5171	-0.412754	0.00105486
NC_030815.1.382.1	1143	117	0.8856	-0.54115	0.000456377
NC_030815.1.385.1	572	45	0.8765	-0.494318	0.000287246
NC_030815.1.397.1	2613	279	0.5183	0.0103749	0.0281373
NC_030815.1.400.1	2687	273	1.0068	-0.086007	0.0622109
NC_030815.1.410.1	1382	210	0.4466	-0.499951	0.000406282
NC_030815.1.413.1	1547	123	0.9359	-0.289788	0.00291854
NC_030815.1.418.1	2921	228	0.8353	-0.19755	0.0111067
NC_030815.1.427.1	2762	180	0.4448	-0.251279	0.0013859
NC_030815.1.438.1	1105	246	0.8592	-0.358515	0.00564218
NC_030815.1.440.1	3166	183	0.5111	-0.170856	0.00292129
NC_030815.1.441.1	1044	72	1.0734	-0.296659	0.00255295
NC_030815.1.442.1	637	153	0.831	-0.363394	0.0018892
NC_030815.1.451.1	2756	492	0.5169	-0.104501	0.118076
NC_030815.1.456.1	1688	168	0.4161	-0.308277	0.000815379
NC_030815.1.458.1	3890	207	0.5829	-0.169201	0.00458317
NC_030815.1.479.1	4041	198	0.7178	-0.0350605	0.0151016
NC_030815.1.490.1	572	69	0.8452	-0.320116	0.00106513
NC_030815.1.491.1	3581	207	0.5377	-0.161208	0.00427259
NC_030815.1.503.1	897	159	0.496	-0.437896	0.000424117
NC_030815.1.524.1	1578	168	0.6757	-0.366172	0.00126557
NC_030815.1.525.1	1953	120	0.5786	-0.434105	0.00034684
NC_030815.1.527.1	349	90	1.0756	-0.0207123	0.0197956
NC_030815.1.540.1	3243	279	0.5198	-0.19986	0.0069384
NC_030815.1.547.1	1733	267	0.8041	0.0063198	0.0602433
NC_030815.1.557.1	2957	186	0.8685	-0.183826	0.00857425
NC_030815.1.580.1	1471	153	0.8156	0.0516425	0.0258695
NC_030815.1.581.1	550	114	0.9032	-0.458132	0.000837093
NC_030815.1.587.1	2689	246	0.8998	-0.330653	0.00698843
NC_030815.1.594.1	1908	198	0.6493	-0.202389	0.00464077
NC_030815.1.595.1	1070	156	0.983	0.0578157	0.0472015
NC_030815.1.60.1	1924	129	0.7046	-0.523488	0.000315356
NC_030815.1.615.1	2807	447	0.7548	0.0175174	0.279427
NC_030815.1.62.1	4503	207	0.4363	-0.248523	0.00165497
NC_030815.1.622.1	830	165	0.9223	-0.060602	0.0205192
NC_030815.1.626.1	2580	246	0.7233	-0.123607	0.0157133
NC_030815.1.65.1	370	33	0.7698	-0.549249	0.000127115
NC_030815.1.66.1	3441	294	0.8846	-0.140499	0.0364228
NC_030815.1.68.1	1997	156	0.9835	0.0601885	0.0454761
NC_030815.1.70.1	2822	252	0.4883	-0.294924	0.00258175
NC_030815.1.8.1	4290	183	0.5494	-0.121331	0.00426206
NC_030815.1.80.1	837	99	0.6915	-0.132893	0.00307271
NC_030815.1.84.1	3172	219	0.8489	-0.220201	0.00893857
NC_030815.1.86.1	1989	219	0.7618	-0.113118	0.0147272
NC_030815.1.95.1	1580	186	0.6796	-0.162603	0.00593957
NC_030816.1.101.1	4405	291	0.8392	0.00831529	0.074019
NC_030816.1.110.1	1337	213	0.8304	0.0881909	0.063934
NC_030816.1.125.1	451	54	1.0184	-0.336172	0.00141354
NC_030816.1.147.1	995	219	0.8077	-0.308162	0.00503438
NC_030816.1.157.1	1616	120	0.5954	-0.230561	0.00142927
NC_030816.1.172.1	906	171	0.6438	-0.223284	0.00315836
NC_030816.1.176.1	1199	195	0.4719	-0.315918	0.00127369
NC_030816.1.181.1	4339	237	0.8286	-0.129403	0.0171419
NC_030816.1.197.1	996	102	0.8721	-0.250216	0.00255659
NC_030816.1.207.1	2902	165	0.4538	-0.460302	0.000302698
NC_030816.1.221.1	2111	297	0.5325	-0.0377228	0.0268578
NC_030816.1.223.1	1646	129	0.8478	-0.277018	0.0025544
NC_030816.1.229.1	2919	168	0.6228	-0.322643	0.00131685
NC_030816.1.230.1	3261	264	0.5891	-0.237663	0.00571546
NC_030816.1.230.2	2922	156	0.7071	-0.0726353	0.00780164
NC_030816.1.230.3	2726	156	0.7071	-0.0726353	0.00789431
NC_030816.1.249.1	2341	285	0.7361	0.0150535	0.0603398
NC_030816.1.251.1	1297	162	0.6504	-0.256555	0.00229546
NC_030816.1.267.1	2694	234	1.0009	0.135622	0.155734
NC_030816.1.275.1	4372	147	0.644	-0.206144	0.00221413
NC_030816.1.280.1	1366	267	1.034	-0.0970541	0.0638564
NC_030816.1.281.1	756	75	1.1873	0.0124492	0.0287684
NC_030816.1.290.1	3125	141	0.4836	-0.432411	0.00030414
NC_030816.1.297.1	2783	144	0.3919	-0.44286	0.000224453
NC_030816.1.299.1	772	90	1.0029	-0.352948	0.00174374
NC_030816.1.303.1	2060	129	0.8443	0.0570258	0.0219239
NC_030816.1.304.1	3701	171	0.7932	-0.238047	0.00386348
NC_030816.1.31.1	2822	204	0.7253	-0.123166	0.00998141
NC_030816.1.310.1	3962	297	0.5474	-0.355786	0.0031552
NC_030816.1.312.1	1093	165	0.8238	-0.149288	0.00835372
NC_030816.1.317.1	2989	195	0.6874	-0.136501	0.00730716
NC_030816.1.326.1	3381	234	0.5285	-0.231802	0.00353256
NC_030816.1.332.1	4035	186	0.5328	-0.273292	0.00156034
NC_030816.1.344.1	924	123	0.5705	-0.490896	0.000255561
NC_030816.1.359.1	2827	123	0.5771	-0.0499866	0.00425446
NC_030816.1.362.1	3073	168	0.7367	-0.115466	0.00728373
NC_030816.1.37.1	2848	156	0.6658	-0.290826	0.00163994
NC_030816.1.373.1	1771	147	0.4898	-0.448305	0.000323467
NC_030816.1.39.1	4175	246	0.5832	-0.588591	0.00043294
NC_030816.1.410.1	329	102	0.8632	-0.367801	0.00119271
NC_030816.1.414.1	2979	330	0.7638	-0.168243	0.0316483
NC_030816.1.428.1	562	63	0.599	-0.509995	0.000131671
NC_030816.1.442.1	3687	138	0.4249	-0.494546	0.000157024
NC_030816.1.442.2	3071	138	0.4249	-0.494546	0.000163007
NC_030816.1.447.1	1265	141	0.4508	0.0843181	0.00922876
NC_030816.1.459.1	1831	198	0.3603	-0.210689	0.00178531
NC_030816.1.470.1	2805	300	0.8461	-0.0733874	0.0546898
NC_030816.1.476.1	1420	120	0.8523	-0.17556	0.00464665
NC_030816.1.479.1	1991	252	0.488	-0.134425	0.00778683
NC_030816.1.481.1	1858	135	0.8841	-0.0559106	0.01285
NC_030816.1.492.1	1620	225	0.5335	-0.10615	0.00826644
NC_030816.1.496.1	2960	198	0.5937	-0.300356	0.00191979
NC_030816.1.507.1	633	186	0.9443	0.0254753	0.0479156
NC_030816.1.508.1	2888	78	0.8372	-0.479547	0.000347402
NC_030816.1.510.1	2805	279	0.6873	-0.256546	0.00828395
NC_030816.1.512.1	2748	165	0.7328	-0.224025	0.00348251
NC_030816.1.514.1	1028	222	0.6673	-0.105445	0.0126335
NC_030816.1.528.1	713	297	0.5696	-0.0548709	0.0292627
NC_030816.1.534.1	4352	183	0.6688	-0.390287	0.00104979
NC_030816.1.64.1	1870	105	0.409	-0.314544	0.000383068
NC_030816.1.69.1	2913	216	0.6165	-0.0550698	0.0125547
NC_030816.1.76.1	1881	150	0.7476	-0.406225	0.000984386
NC_030816.1.9.1	3842	279	0.5915	-0.10155	0.015895
NC_030816.1.95.1	1790	114	0.4035	-0.416749	0.000212398
NC_030816.1.96.1	2967	237	0.9094	-0.0975973	0.029262
NC_030816.1.99.1	1799	150	0.7796	-0.560972	0.000394028
NC_030817.1.12.1	3118	273	0.695	-0.283485	0.00654386
NC_030817.1.123.1	2975	219	0.3142	-0.442227	0.000392589
NC_030817.1.123.2	2799	159	0.3564	-0.357508	0.000414332
NC_030817.1.123.3	2935	219	0.3142	-0.442227	0.000393543
NC_030817.1.123.4	3953	219	0.3142	-0.442227	0.000369963
NC_030817.1.125.1	441	195	0.9855	0.0476651	0.0688626
NC_030817.1.135.1	3675	270	0.947	-0.0504007	0.0596241
NC_030817.1.142.1	2760	255	0.4377	-0.150972	0.00588732
NC_030817.1.163.1	618	108	0.6311	-0.625338	0.000110252
NC_030817.1.175.1	2612	150	0.644	-0.0176674	0.00877556
NC_030817.1.18.1	1903	267	0.4765	-0.225162	0.00489223
NC_030817.1.182.1	1832	246	0.9503	-0.182382	0.0226027
NC_030817.1.183.1	2198	123	0.97	-0.268687	0.0035871
NC_030817.1.198.1	1906	282	0.6559	-0.435236	0.00253116
NC_030817.1.199.1	2778	153	0.6896	-0.136746	0.00473724
NC_030817.1.206.1	1897	270	0.8143	0.00159383	0.0615772
NC_030817.1.207.1	3641	228	0.6067	-0.302122	0.00262138
NC_030817.1.210.1	2891	204	0.3652	-0.167969	0.00240353
NC_030817.1.226.1	4033	228	0.6568	-0.259921	0.0039535
NC_030817.1.226.2	3593	207	0.6114	-0.252744	0.00294476
NC_030817.1.226.3	2710	183	0.968	-0.374511	0.00328799
NC_030817.1.228.1	2008	255	0.4577	-0.274855	0.0029048
NC_030817.1.234.1	2893	222	0.6911	-0.139382	0.00974492
NC_030817.1.236.1	1941	135	0.4941	-0.0652245	0.00356374
NC_030817.1.237.1	3421	270	0.6889	-0.167258	0.0130571
NC_030817.1.240.1	3513	234	0.6281	-0.278628	0.00351767
NC_030817.1.241.1	477	87	0.4494	-0.595494	6.1e-05
NC_030817.1.243.1	3782	258	0.7569	-0.199086	0.0112794
NC_030817.1.244.1	1642	141	0.7279	-0.411975	0.00082018
NC_030817.1.245.1	2891	423	0.4543	-0.0414975	0.0727169
NC_030817.1.248.1	2669	183	0.5781	-0.0381599	0.00887149
NC_030817.1.253.1	1848	135	0.7862	-0.0722825	0.00852184
NC_030817.1.267.1	2704	165	0.7676	0.00684897	0.0176334
NC_030817.1.274.1	2660	378	0.8449	-0.266379	0.036414
NC_030817.1.280.1	893	105	0.7187	-0.0900098	0.00471606
NC_030817.1.285.1	2193	243	0.9288	-0.464472	0.00316883
NC_030817.1.286.1	2850	147	0.6523	-0.460809	0.000464726
NC_030817.1.303.1	2704	186	0.5472	-0.163016	0.00365814
NC_030817.1.310.1	571	213	0.7395	-0.32528	0.00349525
NC_030817.1.324.1	744	210	0.3913	-0.455408	0.000476304
NC_030817.1.327.1	2672	345	0.4112	-0.140292	0.0153163
NC_030817.1.330.1	2101	210	0.5978	-0.0384166	0.0130042
NC_030817.1.331.1	3867	216	0.4629	-0.14108	0.00417924
NC_030817.1.347.2	1763	162	0.7955	-0.471599	0.000852289
NC_030817.1.37.1	2676	126	1.2087	-0.23729	0.00932098
NC_030817.1.388.1	3473	237	0.4806	-0.0076145	0.0135777
NC_030817.1.394.1	498	60	0.9694	-0.497939	0.000443556
NC_030817.1.399.1	2678	249	0.79	-0.278354	0.00722424
NC_030817.1.401.1	1673	219	0.3758	-0.294119	0.00136958
NC_030817.1.401.2	549	222	0.5189	-0.00491575	0.0157951
NC_030817.1.407.1	3649	216	0.5821	-0.545641	0.000427653
NC_030817.1.415.1	3619	447	0.692	-0.0356184	0.175846
NC_030817.1.417.1	3432	141	0.6482	-0.344422	0.00089459
NC_030817.1.419.1	1709	132	0.7898	-0.567561	0.00032243
NC_030817.1.433.1	3349	198	0.6526	-0.131744	0.00683445
NC_030817.1.438.1	4449	411	0.4878	-0.114947	0.0411026
NC_030817.1.445.1	1041	300	0.7157	0.0047879	0.066839
NC_030817.1.448.1	546	93	0.953	0.196834	0.055688
NC_030817.1.473.1	3444	162	1.0043	-0.0617887	0.0217317
NC_030817.1.482.1	3187	234	0.7463	-0.039708	0.0246552
NC_030817.1.485.1	1186	117	0.7337	-0.132096	0.00419005
NC_030817.1.516.1	395	123	0.7696	-0.0170482	0.011145
NC_030817.1.527.1	1389	135	0.9366	-0.132472	0.00943783
NC_030817.1.550.1	3132	135	0.7025	0.139357	0.0241231
NC_030817.1.551.1	1027	243	0.7151	-0.128751	0.0157464
NC_030817.1.571.1	3102	366	0.6467	-0.28182	0.0154137
NC_030817.1.582.1	2829	186	0.8739	-0.278678	0.0047168
NC_030817.1.583.1	3199	162	0.878	-0.219668	0.00531784
NC_030817.1.587.1	4184	222	1.0423	-0.341143	0.00718697
NC_030817.1.590.1	2793	156	0.9866	-0.244547	0.00609232
NC_030817.1.6.1	2602	309	0.6535	0.0630074	0.0798193
NC_030817.1.60.1	2652	150	1.0931	-0.0908883	0.0218431
NC_030817.1.603.1	1771	183	0.7154	0.0814113	0.0310497
NC_030817.1.61.1	814	174	0.5448	-0.00665249	0.00997869
NC_030817.1.615.1	1636	162	0.6744	-0.424098	0.00080337
NC_030817.1.624.1	2703	138	0.6714	0.0901198	0.0168819
NC_030817.1.640.1	2847	309	0.6463	-0.207935	0.0137729
NC_030817.1.644.1	3061	348	0.5718	-0.373829	0.00553062
NC_030817.1.652.1	2807	156	0.4685	-0.122555	0.00268371
NC_030817.1.659.1	3690	141	0.852	-0.138963	0.00645096
NC_030817.1.660.1	1761	276	0.4187	-0.303704	0.00270633
NC_030817.1.664.1	1097	201	1.0094	-0.160102	0.0203137
NC_030817.1.678.1	1039	234	1.1038	0.0308968	0.123687
NC_030817.1.69.1	3325	282	0.5811	-0.170794	0.0104385
NC_030817.1.697.1	784	90	0.4295	-0.507975	0.000103498
NC_030817.1.702.1	1798	120	0.3494	-0.376438	0.000249381
NC_030817.1.703.1	2181	381	0.9662	0.00920753	0.266291
NC_030817.1.738.1	1806	138	0.4867	-0.577588	0.000123537
NC_030817.1.739.1	739	90	0.694	-0.313388	0.000860335
NC_030817.1.76.1	3002	381	0.7464	-0.188083	0.0449343
NC_030817.1.761.1	2894	186	0.6143	-0.0847902	0.00745518
NC_030817.1.762.1	3725	240	1.0429	-0.094559	0.0441146
NC_030817.1.78.1	1826	237	0.8674	-0.0634687	0.0342534
NC_030817.1.782.1	2736	126	1.0132	-0.386389	0.0018916
NC_030817.1.799.1	4156	216	0.5965	-0.258419	0.00288327
NC_030817.1.819.1	1761	402	0.6348	-0.0711444	0.0884476
NC_030817.1.832.1	1950	198	0.8506	-0.115532	0.0152948
NC_030817.1.836.1	2054	138	0.3999	-0.520721	0.000134856
NC_030817.1.837.1	498	294	0.5539	-0.222854	0.00919777
NC_030817.1.839.1	613	120	0.9236	-0.214007	0.00473618
NC_030817.1.853.1	2696	195	0.4812	-0.24721	0.00188376
NC_030817.1.862.1	3194	189	0.4813	0.0103739	0.00931558
NC_030817.1.864.1	806	102	0.3968	-0.372682	0.000259387
NC_030817.1.95.1	1255	171	0.8001	-0.233142	0.00472698
NC_030818.1.113.1	1856	135	0.6355	-0.248782	0.00166565
NC_030818.1.118.1	1758	183	0.671	-0.317537	0.00199848
NC_030818.1.120.1	3024	180	0.7542	-0.42169	0.00117076
NC_030818.1.156.1	3104	204	0.7356	-0.145587	0.00875106
NC_030818.1.167.1	1824	288	0.812	-0.0106969	0.0682911
NC_030818.1.168.1	3240	141	0.754	-0.468601	0.000556072
NC_030818.1.197.1	4210	234	0.6476	0.0342057	0.0275983
NC_030818.1.199.1	3652	198	0.6281	-0.0716976	0.00921335
NC_030818.1.216.1	2838	144	0.8348	-0.131337	0.00698781
NC_030818.1.258.1	3866	303	0.7906	-0.20813	0.0189683
NC_030818.1.259.1	2388	300	0.4552	-0.196741	0.00763659
NC_030818.1.263.1	1577	213	0.5117	-0.387083	0.0010714
NC_030818.1.277.1	876	327	0.4872	0.00705432	0.0457677
NC_030818.1.284.1	3875	207	0.7307	-0.188558	0.00641119
NC_030818.1.3.1	872	252	0.7891	-0.0680173	0.0324501
NC_030818.1.301.1	2764	255	0.4777	-0.270898	0.00303223
NC_030818.1.38.1	355	138	0.4879	-0.155879	0.00218782
NC_030818.1.385.1	787	249	0.6949	0.109979	0.0728914
NC_030818.1.39.1	4045	156	0.5136	-0.263045	0.00113622
NC_030818.1.415.1	1766	180	0.7327	-0.170009	0.00619136
NC_030818.1.425.1	3396	354	0.7518	-0.0170349	0.0974301
NC_030818.1.428.1	3931	423	0.6264	-0.0330091	0.117943
NC_030818.1.436.1	3404	231	0.7224	-0.384447	0.00229523
NC_030818.1.455.1	3296	249	0.7862	-0.170164	0.0139502
NC_030818.1.460.1	904	294	0.5583	-0.10041	0.0201944
NC_030818.1.471.1	569	114	0.3599	-0.293694	0.000449366
NC_030818.1.500.1	751	189	0.6294	-0.163825	0.00546892
NC_030818.1.506.1	1817	279	0.6411	-0.0809349	0.0238735
NC_030818.1.507.1	1612	261	0.7851	-0.142869	0.0208473
NC_030818.1.509.1	3010	309	0.5293	-0.134116	0.015348
NC_030818.1.515.1	2841	324	0.7226	0.0152613	0.0835338
NC_030818.1.521.1	4098	183	0.8216	-0.168388	0.0074097
NC_030818.1.532.1	3336	237	0.6392	-0.36716	0.00212278
NC_030818.1.539.1	3542	219	0.933	-0.114161	0.0226097
NC_030818.1.540.1	2777	150	0.7183	-0.479709	0.000523659
NC_030818.1.546.1	2360	192	0.8453	0.111183	0.0587247
NC_030818.1.555.1	793	105	0.8167	-0.543021	0.00032575
NC_030818.1.560.1	3141	168	0.9595	-0.543515	0.000870934
NC_030818.1.562.1	414	51	0.9088	-0.4551	0.000443662
NC_030818.1.564.1	3024	255	0.5541	-0.0638001	0.0147187
NC_030818.1.565.1	1024	195	0.6146	-0.375146	0.0013631
NC_030818.1.580.1	2945	219	0.5097	-0.297611	0.0018859
NC_030818.1.59.1	3980	261	0.6023	-0.0634635	0.0172368
NC_030818.1.605.1	2010	198	0.5645	-0.255098	0.00250024
NC_030818.1.608.1	1758	126	0.6345	-0.612456	0.000137533
NC_030818.1.617.1	1667	345	0.5308	-0.108652	0.0288128
NC_030818.1.622.1	2601	189	0.6508	-0.0202587	0.0133818
NC_030818.1.628.1	3109	306	0.8361	-0.439008	0.00522617
NC_030818.1.631.1	4257	195	0.7977	-0.181336	0.00711773
NC_030818.1.653.1	1874	222	0.6581	-0.223045	0.00540284
NC_030818.1.664.1	2854	213	0.5172	-0.376972	0.00107838
NC_030818.1.677.1	1782	210	0.7766	0.0374153	0.0374143
NC_030818.1.686.1	1223	123	0.6747	-0.3707	0.000769522
NC_030818.1.690.1	2615	204	0.7269	-0.3774	0.00191147
NC_030818.1.70.1	2712	174	0.5804	-0.250287	0.00200671
NC_030818.1.710.1	575	114	0.4678	-0.472438	0.000193755
NC_030818.1.723.1	862	216	0.8472	-0.133295	0.0174275
NC_030818.1.725.1	729	123	0.7805	-0.126548	0.00551607
NC_030818.1.730.1	2757	162	0.4936	-0.220219	0.00163264
NC_030818.1.742.1	3633	279	0.857	0.116924	0.137479
NC_030818.1.768.1	2632	363	0.7238	-0.243956	0.0248769
NC_030818.1.770.1	2641	360	0.6489	-0.0662889	0.0593063
NC_030818.1.776.1	1707	120	0.6062	-0.187876	0.00194814
NC_030818.1.786.1	2650	183	0.5969	0.0387432	0.0155499
NC_030818.1.797.1	3269	390	0.7044	0.0519813	0.179104
NC_030818.1.804.1	1100	159	1.0405	0.0258049	0.0471982
NC_030818.1.83.1	4189	231	0.4217	-0.17475	0.00339328
NC_030818.1.92.1	2912	177	0.9505	-0.109394	0.0163687
NC_030819.1.111.1	905	180	0.4963	-0.2729	0.00158087
NC_030819.1.120.1	2186	162	0.5792	-0.582989	0.000201913
NC_030819.1.126.1	2796	255	0.5774	-0.168129	0.00811747
NC_030819.1.130.1	2756	231	0.5532	-0.0999571	0.00911597
NC_030819.1.134.1	2976	210	0.7797	-0.204147	0.00735329
NC_030819.1.136.1	2963	201	0.517	-0.197186	0.0030756
NC_030819.1.148.1	2904	462	0.61	-0.427502	0.0150059
NC_030819.1.152.1	3612	300	0.4592	-0.0283839	0.0215136
NC_030819.1.155.1	2915	189	0.5313	-0.0811392	0.00607862
NC_030819.1.165.1	2141	252	0.4893	-0.203184	0.00493477
NC_030819.1.171.1	3260	321	0.7517	-0.118902	0.0374158
NC_030819.1.185.1	437	105	1.0667	-0.13623	0.0106012
NC_030819.1.187.1	1425	240	0.8239	-0.246486	0.00968571
NC_030819.1.200.1	2848	333	0.5192	-0.141416	0.0184889
NC_030819.1.208.1	1653	183	0.7259	-0.233961	0.00414089
NC_030819.1.217.1	3640	204	0.6766	-0.143053	0.00716769
NC_030819.1.222.1	3564	300	0.5895	-0.184454	0.0117109
NC_030819.1.228.1	410	105	0.6506	-0.353337	0.000691954
NC_030819.1.230.1	3600	183	0.5718	-0.240656	0.00217339
NC_030819.1.244.1	3290	240	0.5353	-0.427568	0.0010658
NC_030819.1.250.1	2590	171	0.6616	-0.300843	0.00180941
NC_030819.1.251.1	3680	213	0.4464	-0.334046	0.00109009
NC_030819.1.263.1	306	108	0.4737	-0.463935	0.000198886
NC_030819.1.265.1	1742	126	0.6061	-0.331099	0.000806404
NC_030819.1.266.1	3138	267	0.5988	-0.177761	0.00907634
NC_030819.1.269.1	982	120	0.672	-0.224166	0.00196995
NC_030819.1.278.1	4376	177	0.533	-0.0425104	0.00633731
NC_030819.1.279.1	2707	267	0.7694	-0.222272	0.0118365
NC_030819.1.282.1	1591	117	0.8145	-0.466931	0.00057977
NC_030819.1.283.1	1666	141	0.5329	-0.160586	0.00233008
NC_030819.1.285.1	3315	183	0.4007	-0.459885	0.000304351
NC_030819.1.30.1	1261	267	0.5836	0.163345	0.0851283
NC_030819.1.300.1	3146	192	0.7367	-0.286403	0.00305366
NC_030819.1.316.1	1628	87	0.7045	-0.0437431	0.00481863
NC_030819.1.323.1	1328	207	0.8545	-0.385566	0.00301724
NC_030819.1.326.1	1071	177	0.6566	-0.190652	0.00430347
NC_030819.1.328.1	378	36	0.9726	-0.578318	0.000204839
NC_030819.1.329.1	3129	210	0.9259	0.00601193	0.0444636
NC_030819.1.343.1	1831	93	0.714	-0.423415	0.000428493
NC_030819.1.361.1	1692	186	0.5309	-0.481978	0.000451343
NC_030819.1.38.1	2958	225	0.4371	-0.256962	0.00209291
NC_030819.1.388.1	2929	285	0.8783	-0.409956	0.00582041
NC_030819.1.389.2	2120	162	0.8916	-0.0563156	0.0172155
NC_030819.1.395.1	1588	324	0.534	-0.0105868	0.043838
NC_030819.1.397.1	1620	150	0.6323	-0.331716	0.0011384
NC_030819.1.41.1	575	108	0.7493	-0.0719955	0.00614942
NC_030819.1.49.1	2938	171	0.4954	-0.371507	0.00065986
NC_030819.1.50.1	1642	138	0.6305	-0.2161	0.00212815
NC_030819.1.70.1	1706	195	0.7182	-0.0873921	0.0119778
NC_030819.1.82.1	1554	165	0.9036	-0.0742854	0.0169779
NC_030820.1.119.1	983	273	0.6138	0.0263052	0.0429926
NC_030820.1.123.1	1999	315	0.5587	-0.0576229	0.0311398
NC_030820.1.146.1	2057	243	0.7082	-0.390374	0.00260725
NC_030820.1.147.1	954	177	0.7143	-0.426081	0.00110144
NC_030820.1.15.1	1642	285	0.8075	-0.0188351	0.0628262
NC_030820.1.186.1	4027	294	0.7713	-0.015947	0.0549573
NC_030820.1.192.1	433	117	0.8563	0.0677255	0.0236465
NC_030820.1.194.1	3402	240	0.7665	-0.221015	0.00849633
NC_030820.1.201.1	2711	297	0.7214	-0.0813074	0.0348693
NC_030820.1.205.1	3129	357	0.6593	-0.173398	0.0292988
NC_030820.1.21.1	3928	366	0.4948	-0.0137315	0.051449
NC_030820.1.214.1	488	75	1.075	-0.403286	0.00135754
NC_030820.1.216.1	1764	171	0.6316	-0.0733996	0.00772633
NC_030820.1.233.1	3519	153	0.8748	-0.270048	0.00336561
NC_030820.1.254.1	2880	324	0.4899	-0.0265597	0.0321428
NC_030820.1.255.1	3144	273	1.0175	0.0463566	0.137857
NC_030820.1.260.1	3118	186	0.7296	-0.0339245	0.0146745
NC_030820.1.30.1	959	144	0.7056	-0.168534	0.00409446
NC_030820.1.302.1	3863	249	0.5808	-0.161678	0.00752504
NC_030820.1.303.1	2166	150	0.6422	-0.290483	0.00149103
NC_030820.1.307.1	2887	156	0.5338	-0.2895	0.00109074
NC_030820.1.308.1	3200	177	0.4796	-0.33244	0.000853282
NC_030820.1.310.1	1843	126	0.4609	-0.115052	0.00211196
NC_030820.1.313.1	2043	291	0.5314	0.0121134	0.034719
NC_030820.1.316.1	2627	186	0.6845	-0.140117	0.006562
NC_030820.1.319.1	741	333	0.6561	-0.0277666	0.0651625
NC_030820.1.336.1	1600	282	0.447	-0.106468	0.0116165
NC_030820.1.337.1	826	147	0.5657	-0.153394	0.00303925
NC_030820.1.338.1	3795	450	0.5975	-0.163425	0.0651464
NC_030820.1.339.1	1776	246	0.6906	-0.14354	0.0130873
NC_030820.1.34.1	2031	159	0.8489	0.013732	0.0231285
NC_030820.1.340.1	3294	270	0.7056	-0.0717921	0.025711
NC_030820.1.341.1	2904	210	0.9288	0.0393393	0.0559993
NC_030820.1.342.1	2847	501	0.508	-0.353281	0.0268699
NC_030820.1.356.1	2042	141	0.7383	-0.181231	0.00378356
NC_030820.1.357.1	1550	213	0.7246	0.141753	0.0644317
NC_030820.1.359.1	1820	159	0.6278	-0.145634	0.00416291
NC_030820.1.359.2	1777	342	0.4906	-0.0387895	0.0383513
NC_030820.1.360.1	3968	159	0.8421	-0.169557	0.00610562
NC_030820.1.361.1	410	111	0.4506	-0.448935	0.000209621
NC_030820.1.362.1	1685	150	0.4261	-0.439792	0.000290862
NC_030820.1.365.1	2690	270	0.7133	0.0352215	0.0537904
NC_030820.1.368.1	3465	276	0.4093	-0.154597	0.00631825
NC_030820.1.369.1	2959	117	0.7529	-0.0355136	0.00753603
NC_030820.1.37.1	3524	165	0.6756	-0.0387148	0.00937909
NC_030820.1.374.1	771	60	0.9237	-0.387439	0.000783596
NC_030820.1.375.1	2824	186	0.6661	-0.26916	0.0026208
NC_030820.1.387.1	2997	369	0.6901	0.0153717	0.11716
NC_030820.1.39.1	971	156	0.6476	-0.42191	0.000731163
NC_030820.1.41.1	2865	309	0.7572	-0.181599	0.0229784
NC_030820.1.414.1	4274	198	0.5698	-0.36675	0.00106166
NC_030820.1.424.1	794	141	0.6019	-0.312675	0.00111929
NC_030820.1.441.1	1630	210	0.5488	-0.234198	0.00318094
NC_030820.1.45.1	3668	387	0.514	-0.307187	0.01047
NC_030820.1.478.1	3026	213	0.7777	0.0327018	0.0349476
NC_030820.1.509.1	2786	474	0.7448	-0.033157	0.265006
NC_030820.1.512.1	2264	273	0.6459	-0.114467	0.0178254
NC_030820.1.534.1	3050	225	0.7242	0.0232219	0.0316537
NC_030820.1.537.1	3339	300	0.4862	-0.0520991	0.0203824
NC_030820.1.600.1	1329	195	0.5422	-0.104101	0.00634912
NC_030820.1.605.1	2398	174	0.5437	-0.229393	0.002092
NC_030820.1.610.1	2313	153	0.9838	0.016414	0.032808
NC_030820.1.62.1	3691	270	0.5324	-0.594413	0.00047408
NC_030820.1.73.1	1553	177	0.6617	0.0195942	0.0168051
NC_030820.1.81.1	1124	207	0.8963	-0.178986	0.0134831
NC_030820.1.92.1	767	192	0.5479	-0.0936692	0.0069324
NC_030821.1.116.1	2897	159	0.7543	-0.355527	0.00145526
NC_030821.1.121.1	3226	222	0.4805	-0.166513	0.00414266
NC_030821.1.125.1	2818	264	0.6657	0.116194	0.0720946
NC_030821.1.133.1	3311	279	0.5969	-0.0872123	0.0183095
NC_030821.1.14.2	1234	291	0.7137	0.0262009	0.0684836
NC_030821.1.148.1	3463	270	0.7905	-0.192256	0.0151624
NC_030821.1.153.1	2877	357	0.7357	0.0647104	0.158021
NC_030821.1.158.1	2958	288	0.798	0.0136322	0.0713953
NC_030821.1.159.1	2159	159	0.6814	-0.289157	0.00187523
NC_030821.1.161.1	3807	318	0.4702	-0.202064	0.00860557
NC_030821.1.169.1	2012	300	0.7829	0.0127581	0.080803
NC_030821.1.177.1	1024	300	0.6204	0.0583313	0.0703602
NC_030821.1.19.1	689	324	0.5732	-0.0733201	0.0349295
NC_030821.1.190.1	1791	183	0.5982	-0.325957	0.00150163
NC_030821.1.193.1	1602	315	0.7695	-0.0558489	0.0606828
NC_030821.1.2.1	370	99	1.1735	-0.0155629	0.0303342
NC_030821.1.221.1	1443	225	0.6587	-0.108536	0.0121419
NC_030821.1.224.1	686	282	0.5485	-0.0906466	0.0186189
NC_030821.1.246.1	1236	132	0.6346	-0.0730976	0.00530629
NC_030821.1.255.1	3292	339	0.6329	-0.0291084	0.055448
NC_030821.1.261.1	2901	201	0.602	-0.311888	0.00189307
NC_030821.1.281.2	2845	144	0.9111	-0.495645	0.000806021
NC_030821.1.29.1	2123	255	0.7569	-0.257573	0.00823338
NC_030821.1.296.1	3524	147	0.786	-0.411076	0.000942452
NC_030821.1.300.1	3785	384	0.4687	-0.351848	0.00652574
NC_030821.1.307.1	2769	411	0.8557	-0.117437	0.12918
NC_030821.1.314.1	2997	213	0.7125	-0.335122	0.00259917
NC_030821.1.324.1	2025	150	0.7014	-0.193982	0.00341864
NC_030821.1.330.1	1740	156	0.8943	-0.1513	0.00896852
NC_030821.1.332.1	2796	189	0.8712	-0.185764	0.00890246
NC_030821.1.335.1	2863	324	0.4237	-0.222926	0.00733048
NC_030821.1.336.1	1459	192	0.6557	-0.131442	0.00726567
NC_030821.1.338.1	1863	168	0.734	0.000164316	0.0165225
NC_030821.1.344.1	2873	201	0.6762	-0.226377	0.00420091
NC_030821.1.346.1	1205	180	0.5101	-0.204631	0.00254186
NC_030821.1.35.1	2793	192	0.7401	-0.284202	0.00319902
NC_030821.1.370.1	1171	162	0.8565	-0.092972	0.0128781
NC_030821.1.373.1	1610	180	0.806	-0.140812	0.00951018
NC_030821.1.375.1	4633	204	0.3671	-0.242515	0.00133112
NC_030821.1.376.1	4186	270	0.4085	-0.241953	0.00318566
NC_030821.1.384.1	2810	156	0.8455	-0.200416	0.00523255
NC_030821.1.397.1	1204	93	0.5388	-0.605424	7.72e-05
NC_030821.1.411.1	3710	213	0.7678	0.0295188	0.031923
NC_030821.1.416.1	2928	276	0.7392	0.00160969	0.0493835
NC_030821.1.423.1	2781	222	0.5781	-0.266723	0.00298781
NC_030821.1.430.1	1989	159	1.0458	-0.0546659	0.0272869
NC_030821.1.436.1	3392	384	0.8125	-0.00409178	0.164469
NC_030821.1.442.2	3924	225	0.9498	-0.0908838	0.0287945
NC_030821.1.454.1	2992	216	0.8833	-0.258925	0.0075585
NC_030821.1.458.1	1604	234	0.9368	0.116458	0.124329
NC_030821.1.464.1	4218	141	0.8563	-0.148302	0.00595671
NC_030821.1.508.1	1392	294	0.4333	-0.389103	0.0020044
NC_030821.1.520.1	2822	306	0.5031	-0.178442	0.0103814
NC_030821.1.522.1	2805	201	0.5817	-0.305811	0.00185968
NC_030821.1.523.1	3211	267	0.806	-0.125577	0.0240836
NC_030821.1.55.1	1757	147	0.5899	-0.0991582	0.00442738
NC_030821.1.59.1	3246	147	0.5477	-0.564702	0.000164532
NC_030821.1.65.1	2982	195	0.6795	-0.246795	0.00345603
NC_030821.1.78.1	791	96	0.6987	-0.133762	0.00303388
NC_030821.1.86.1	2710	225	0.6085	-0.124442	0.00867533
NC_030822.1.101.1	1955	207	0.8029	-0.193369	0.00873524
NC_030822.1.103.1	2785	243	0.9829	-0.264297	0.0134459
NC_030822.1.121.1	762	102	0.5149	-0.454552	0.000219545
NC_030822.1.139.1	2172	204	0.8526	-0.393065	0.00262629
NC_030822.1.158.1	2643	231	0.793	-0.373164	0.00322979
NC_030822.1.162.1	2734	195	0.6451	-0.108787	0.00779838
NC_030822.1.165.1	2254	246	0.5168	-0.224012	0.00436679
NC_030822.1.172.1	4189	159	0.3849	-0.377255	0.000365582
NC_030822.1.177.1	4026	156	0.676	-0.632474	0.000165455
NC_030822.1.191.1	1695	315	0.6229	-0.166859	0.0191017
NC_030822.1.224.1	3221	234	0.8623	-0.172621	0.014877
NC_030822.1.232.1	484	120	1.1396	-0.438507	0.00214272
NC_030822.1.236.1	3873	228	0.5223	0.0890345	0.025628
NC_030822.1.250.1	2110	180	0.4425	-0.337713	0.000809468
NC_030822.1.253.1	2764	273	0.454	-0.0539282	0.0141646
NC_030822.1.258.1	1752	180	0.6719	-0.245605	0.00311723
NC_030822.1.265.1	1489	252	0.7162	0.0134325	0.0421359
NC_030822.1.273.2	3828	273	0.8558	-0.0235395	0.0549782
NC_030822.1.277.1	3703	186	0.5879	-0.15342	0.00416628
NC_030822.1.285.1	2201	204	1.0448	0.0185788	0.0678891
NC_030822.1.337.1	2872	171	0.9864	-0.367098	0.00318216
NC_030822.1.341.1	1019	126	1.026	0.136278	0.0645805
NC_030822.1.345.2	1895	231	0.5046	-0.0360833	0.012527
NC_030822.1.350.1	3088	246	1.007	-0.0692264	0.0512788
NC_030822.1.351.1	1408	201	0.8885	-0.122661	0.0175072
NC_030822.1.359.1	4306	207	0.789	-0.430554	0.00152529
NC_030822.1.364.1	3618	168	0.5151	-0.431564	0.000438737
NC_030822.1.368.1	929	180	0.6196	-0.0405103	0.0106877
NC_030822.1.396.1	3022	426	0.5773	-0.169139	0.0484531
NC_030822.1.428.1	3342	198	0.5751	-0.0450319	0.00947586
NC_030822.1.432.1	3059	246	0.9823	-0.132569	0.0319257
NC_030822.1.437.1	2818	210	0.7118	-0.215431	0.00557718
NC_030822.1.438.1	2668	345	0.7584	-0.0931593	0.0594637
NC_030822.1.439.1	3849	243	0.4948	-0.0564545	0.0107562
NC_030822.1.443.1	574	120	1.083	-0.1125	0.0151515
NC_030822.1.445.1	1595	156	0.956	-0.117569	0.0136583
NC_030822.1.447.1	4247	156	0.332	-0.456064	0.000177537
NC_030822.1.482.1	1719	216	0.8088	-0.143323	0.0137751
NC_030822.1.495.1	2878	207	0.793	-0.0494731	0.0204582
NC_030822.1.502.1	725	135	0.7475	0.0777862	0.0214751
NC_030822.1.504.1	1681	213	0.4449	-0.163676	0.00376259
NC_030822.1.516.1	899	129	0.8877	-0.304753	0.002523
NC_030822.1.518.1	3024	150	0.6797	-0.274492	0.00176914
NC_030822.1.520.1	3128	192	0.5373	-0.104545	0.0054155
NC_030822.1.520.2	2206	186	0.4264	-0.22582	0.00170735
NC_030822.1.531.1	1528	225	0.7503	-0.0328259	0.0261765
NC_030822.1.58.1	676	114	0.8208	-0.624722	0.0002136
NC_030822.1.83.1	2819	276	0.5009	-0.14913	0.00905938
NC_030822.1.84.1	2252	222	0.9472	0.0374664	0.0684968
NC_030822.1.89.1	1700	243	0.4624	-0.0735202	0.00989823
NC_030823.1.105.1	1134	249	0.4541	-0.324397	0.0020483
NC_030823.1.106.1	2785	168	0.5608	-0.45915	0.000444045
NC_030823.1.117.1	2700	162	0.6695	-0.330499	0.00137503
NC_030823.1.119.1	1519	174	0.7449	-0.108416	0.00916402
NC_030823.1.13.1	4357	258	0.6066	-0.465926	0.00117845
NC_030823.1.141.1	898	195	0.5836	-0.247722	0.00288578
NC_030823.1.17.1	4540	171	0.8657	-0.383222	0.00177181
NC_030823.1.208.1	4491	309	0.8659	-0.089442	0.0522183
NC_030823.1.21.1	1641	174	0.8307	-0.254023	0.00457549
NC_030823.1.223.1	666	138	0.7842	0.0149855	0.0165862
NC_030823.1.234.1	894	114	0.4557	-0.4409	0.000225294
NC_030823.1.238.1	2913	240	0.5653	-0.265134	0.00349351
NC_030823.1.245.1	1868	195	0.8601	-0.246132	0.0065305
NC_030823.1.25.1	3990	171	0.5781	-0.150829	0.00343655
NC_030823.1.271.1	2026	81	1.0632	-0.323351	0.00215341
NC_030823.1.272.1	2707	387	0.5824	-0.255277	0.019214
NC_030823.1.275.1	2866	198	0.5307	-0.123775	0.0050667
NC_030823.1.281.1	2200	252	0.7342	-0.131437	0.0168417
NC_030823.1.3.1	1994	255	0.8796	-0.156194	0.023463
NC_030823.1.303.1	834	234	0.8076	0.0057968	0.0455691
NC_030823.1.313.1	2577	309	0.6346	-0.0466973	0.0381626
NC_030823.1.328.1	2099	150	0.6054	-0.407651	0.000615816
NC_030823.1.329.1	2632	189	0.7815	-0.214702	0.00562205
NC_030823.1.331.1	559	84	0.5866	-0.825447	1.98e-05
NC_030823.1.339.1	1729	258	0.6604	-0.107904	0.0171249
NC_030823.1.349.1	859	126	0.8281	-0.261904	0.00269372
NC_030823.1.369.1	1581	300	0.6453	-0.2206	0.0123902
NC_030823.1.37.1	3699	144	0.4965	-0.350439	0.000542712
NC_030823.1.373.1	3459	300	0.5693	-0.185566	0.0109881
NC_030823.1.380.1	1741	108	0.7643	-0.326926	0.00112139
NC_030823.1.391.1	594	72	0.8852	-0.0279125	0.00851347
NC_030823.1.395.1	3316	159	0.7786	-0.314056	0.00201244
NC_030823.1.40.1	3929	228	0.6167	-0.354871	0.00187781
NC_030823.1.404.1	925	144	0.9253	-0.186468	0.0072457
NC_030823.1.413.1	3732	306	0.504	0.0254583	0.0368452
NC_030823.1.424.1	4190	456	0.6183	-0.117257	0.0951174
NC_030823.1.424.2	3082	456	0.6183	-0.117257	0.101068
NC_030823.1.429.1	1652	342	0.7146	-0.0914618	0.054257
NC_030823.1.437.1	1751	201	0.877	-0.134614	0.015317
NC_030823.1.440.1	2996	297	0.8391	-0.0195224	0.0717428
NC_030823.1.45.1	2995	309	0.6912	-0.102865	0.0309069
NC_030823.1.46.1	2775	288	0.3847	-0.26104	0.00344831
NC_030823.1.47.1	1579	108	0.8357	-0.186565	0.00357159
NC_030823.1.499.1	2985	144	0.4335	-0.363366	0.000426989
NC_030823.1.50.1	1937	93	0.6167	-0.457767	0.00025001
NC_030823.1.512.1	3984	435	0.5453	0.0433246	0.162961
NC_030823.1.517.1	2148	198	0.57	-0.215892	0.00326539
NC_030823.1.528.1	1878	195	0.6213	-0.0726401	0.00965905
NC_030823.1.530.1	2916	156	0.7929	-0.362503	0.00151703
NC_030823.1.537.1	689	96	0.8321	-0.258128	0.00204427
NC_030823.1.538.1	1082	444	0.6875	-0.333589	0.0321516
NC_030823.1.539.1	2802	180	0.8395	0.029759	0.0296909
NC_030823.1.540.1	4165	318	0.5747	-0.0487428	0.0314374
NC_030823.1.56.1	1687	186	0.8418	-0.119135	0.0129959
NC_030823.1.566.1	4330	234	0.5526	-0.114615	0.00776474
NC_030823.1.568.1	885	147	0.8726	0.103779	0.0417083
NC_030823.1.61.1	701	228	0.7064	0.0495481	0.0419758
NC_030823.1.72.1	3226	309	0.927	-0.0303231	0.0962522
NC_030823.1.87.1	649	63	1.0285	-0.290831	0.00214201
NC_030824.1.100.1	487	102	0.9858	-0.612494	0.000345457
NC_030824.1.132.1	751	120	0.7013	-0.427451	0.000573105
NC_030824.1.152.1	1830	114	0.4775	-0.186714	0.00121966
NC_030824.1.155.1	1653	252	0.8345	-0.067462	0.0357027
NC_030824.1.158.1	1684	135	0.5891	-0.342926	0.000782059
NC_030824.1.168.1	3081	102	0.9618	-0.357227	0.0014747
NC_030824.1.172.1	1729	144	0.9729	-0.100929	0.0140004
NC_030824.1.181.1	2730	267	0.5472	-0.331357	0.00288763
NC_030824.1.193.1	1488	144	0.7614	-0.337433	0.00155308
NC_030824.1.204.1	1682	306	0.5315	-0.12865	0.0167889
NC_030824.1.211.1	3094	156	0.5282	-0.214417	0.00173634
NC_030824.1.213.1	2289	138	0.6226	-0.256135	0.00153329
NC_030824.1.215.1	2272	312	0.5787	-0.455019	0.00235797
NC_030824.1.227.1	463	180	0.7419	-0.0751736	0.0128153
NC_030824.1.233.1	2630	408	0.6937	0.109857	0.280795
NC_030824.1.249.1	1691	384	0.5915	-0.0209847	0.088833
NC_030824.1.263.1	3191	306	0.6717	-0.051576	0.0387036
NC_030824.1.27.1	1667	198	0.5326	0.0125333	0.0133705
NC_030824.1.276.1	1402	219	0.4698	-0.261373	0.00231998
NC_030824.1.290.1	1676	192	0.7882	-0.0066879	0.024352
NC_030824.1.31.1	2651	303	0.5	-0.0814887	0.0189101
NC_030824.1.34.1	1807	240	0.7406	-0.0697989	0.0230736
NC_030824.1.350.1	1543	195	0.6179	-0.18851	0.00456156
NC_030824.1.36.1	2669	183	0.8609	0.0202247	0.0310091
NC_030824.1.377.2	2314	513	0.5228	-0.0653686	0.18543
NC_030824.1.377.3	2049	246	0.4462	-0.182534	0.00465632
NC_030824.1.38.1	2930	354	0.4845	-0.0450128	0.0383321
NC_030824.1.381.1	3649	621	0.5134	-0.139566	0.286428
NC_030824.1.385.1	4103	294	0.7585	-0.0341171	0.0469997
NC_030824.1.390.1	1276	219	0.4691	-0.399898	0.000935937
NC_030824.1.395.1	1612	165	0.8243	0.0781502	0.0354017
NC_030824.1.398.1	1853	144	0.4954	-0.260779	0.00109295
NC_030824.1.407.1	1077	165	0.6643	-0.316492	0.00169093
NC_030824.1.409.1	1645	210	0.9377	0.0843471	0.0814193
NC_030824.1.410.1	2836	210	0.6625	-0.257943	0.00361101
NC_030824.1.411.1	631	72	0.5011	-0.385524	0.00024166
NC_030824.1.416.1	2866	126	0.4882	-0.276091	0.000747807
NC_030824.1.428.1	393	102	0.4885	-0.149295	0.00154863
NC_030824.1.436.1	1920	132	0.7661	-0.416666	0.000799841
NC_030824.1.442.1	2365	324	0.616	0.0117868	0.0615578
NC_030824.1.444.1	819	132	0.9922	0.125667	0.058838
NC_030824.1.452.1	1389	150	0.9381	-0.0468298	0.0194321
NC_030824.1.454.1	1119	225	0.8862	0.087073	0.0852614
NC_030824.1.456.1	1728	234	0.6361	-0.133437	0.0104124
NC_030824.1.457.1	1620	186	0.6814	-0.252673	0.00329642
NC_030824.1.462.2	1554	147	0.5752	-0.240737	0.00168528
NC_030824.1.64.1	2753	159	0.7492	-0.375281	0.00126829
NC_030824.1.77.1	3555	243	0.8413	-0.173628	0.0149415
NC_030824.1.78.1	2982	186	0.6127	-0.340261	0.00137426
NC_030824.1.81.1	3695	528	0.4942	0.0287812	0.295275
NC_030824.1.96.1	3155	303	0.6527	-0.26946	0.00865551
NC_030824.1.96.2	3165	303	0.6527	-0.26946	0.0086503
NC_030824.1.96.3	3165	303	0.6527	-0.26946	0.0086503
NC_030824.1.96.4	1949	303	0.6527	-0.26946	0.00930699
NC_030825.1.104.1	414	162	0.8889	-0.0739818	0.0168548
NC_030825.1.132.1	490	84	0.7016	-0.295108	0.000945821
NC_030825.1.133.1	4523	189	0.7485	-0.0176933	0.0164122
NC_030825.1.181.1	1870	183	0.9567	-0.0534628	0.0271466
NC_030825.1.182.1	2993	231	0.9677	0.0577189	0.0863078
NC_030825.1.188.1	2688	300	0.6612	-0.121236	0.0232122
NC_030825.1.188.2	3284	300	0.6612	-0.121236	0.0224056
NC_030825.1.189.1	655	159	0.6271	-0.158448	0.00409683
NC_030825.1.203.1	576	279	0.8192	0.0643312	0.107477
NC_030825.1.203.2	607	279	0.8192	0.0643312	0.107296
NC_030825.1.238.1	577	96	0.7852	-0.127055	0.00421106
NC_030825.1.24.1	1871	252	0.7377	0.134293	0.0926691
NC_030825.1.277.2	712	273	0.7404	0.0269072	0.0638893
NC_030825.1.344.1	3343	177	0.7439	-0.564612	0.000419205
NC_030825.1.356.1	2805	504	0.6485	0.00127685	0.316018
NC_030825.1.365.1	3759	162	0.9151	-0.0119312	0.0223742
NC_030825.1.366.1	3907	210	0.5831	-0.250032	0.00278028
NC_030825.1.372.1	3896	390	0.9376	0.0105719	0.249515
NC_030825.1.376.1	2692	195	0.7206	-0.120478	0.0091625
NC_030825.1.377.1	3966	264	0.7296	-0.265176	0.00709064
NC_030825.1.379.1	2997	225	0.8406	-0.0710784	0.024737
NC_030825.1.391.1	3734	201	0.9418	-0.102532	0.0204654
NC_030825.1.394.1	888	189	0.4728	-0.0182633	0.00864173
NC_030825.1.402.1	1647	216	0.6875	-0.124103	0.0107625
NC_030825.1.404.1	2272	486	0.6922	-0.0102944	0.294531
NC_030825.1.417.1	2902	342	0.5716	-0.15666	0.0215857
NC_030825.1.424.1	1120	204	0.651	-0.326229	0.00231088
NC_030825.1.426.1	3205	294	0.6274	-0.386501	0.00335663
NC_030825.1.444.1	2864	282	0.8482	-0.386103	0.00602304
NC_030825.1.448.1	2230	183	0.5876	-0.225134	0.0027484
NC_030825.1.450.2	1123	177	0.8158	-0.280566	0.00390871
NC_030825.1.466.1	2784	336	0.7151	-0.116337	0.040914
NC_030825.1.485.1	2912	219	0.5705	-0.169876	0.00529825
NC_030825.1.486.1	2970	177	0.4771	-0.172371	0.0024662
NC_030825.1.494.1	1764	177	0.8913	-0.29727	0.00426678
NC_030825.1.516.1	2581	132	0.5161	-0.355198	0.000525789
NC_030825.1.530.1	2102	345	0.7175	-0.221703	0.0240348
NC_030825.1.531.1	4165	393	0.7976	-0.225144	0.0438862
NC_030825.1.532.1	2860	357	0.4671	-0.168766	0.0169992
NC_030825.1.533.1	3889	237	0.7655	-0.0406551	0.0257328
NC_030825.1.54.1	3497	438	0.6295	-0.0670885	0.115189
NC_030825.1.544.1	2770	435	0.5483	-0.000873996	0.136456
NC_030825.1.547.1	2956	261	0.8491	-0.245488	0.0120387
NC_030825.1.604.1	3467	372	0.5118	0.0680948	0.0972803
NC_030825.1.632.1	589	189	0.8479	-0.0921993	0.0173966
NC_030825.1.674.1	854	150	0.5574	-0.106103	0.00416771
NC_030825.1.682.1	893	210	0.5129	-0.126253	0.00604336
NC_030825.1.724.1	3035	207	0.871	0.0309202	0.0430097
NC_030825.1.759.1	2624	228	0.504	-0.0712296	0.00921283
NC_030826.1.115.1	4105	267	0.6194	-0.337036	0.00320905
NC_030826.1.12.1	3003	228	0.5276	-0.359922	0.00145276
NC_030826.1.125.1	1604	213	0.6378	-0.210924	0.00506624
NC_030826.1.135.1	1863	294	0.7938	-0.0816485	0.0440923
NC_030826.1.136.1	3079	300	1.0265	0.166345	0.328088
NC_030826.1.14.1	3311	294	1.0682	-0.0975205	0.082645
NC_030826.1.177.1	2599	303	0.8693	0.0225535	0.109237
NC_030826.1.178.1	3370	255	0.7272	-0.390989	0.00289695
NC_030826.1.18.1	1652	276	0.8172	-0.0368313	0.0527125
NC_030826.1.216.1	1394	345	0.9917	0.0547949	0.274114
NC_030826.1.230.1	3979	447	0.9105	-0.0922022	0.222063
NC_030826.1.24.1	1815	132	0.6263	-0.375744	0.000679832
NC_030826.1.242.1	2975	216	0.5737	-0.207004	0.00404425
NC_030826.1.251.1	3384	249	0.5521	-0.413483	0.00135097
NC_030826.1.266.1	3276	243	1.0189	0.00926097	0.0827095
NC_030826.1.278.1	2801	351	0.7557	-0.0389228	0.0866946
NC_030826.1.28.1	1704	129	0.7189	-0.320567	0.00127513
NC_030826.1.30.1	3632	513	0.6769	0.00476901	0.351431
NC_030826.1.312.1	3184	183	0.6602	-0.199578	0.0038529
NC_030826.1.319.1	2681	252	0.6059	-0.244377	0.0052466
NC_030826.1.32.1	2615	240	0.8008	-0.249033	0.00825191
NC_030826.1.322.1	4049	165	0.7883	-0.209662	0.00420905
NC_030826.1.324.1	3531	366	0.6291	-0.152949	0.0326899
NC_030826.1.337.1	1040	309	0.6876	-0.0806902	0.0394839
NC_030826.1.353.1	3221	243	1.0586	-0.174007	0.0296548
NC_030826.1.369.1	467	60	1.0126	0.112582	0.0278766
NC_030826.1.37.1	3984	279	0.5832	-0.362121	0.00278468
NC_030826.1.38.1	3618	459	0.6812	-0.183668	0.0811838
NC_030826.1.382.1	3862	282	0.6977	-0.122716	0.0198291
NC_030826.1.392.1	3775	285	0.5809	-0.0479502	0.0232891
NC_030826.1.396.1	2652	252	0.578	-0.300667	0.00332662
NC_030826.1.400.1	1641	150	1.0452	-0.168291	0.0121051
NC_030826.1.443.1	3183	240	0.7946	-0.085134	0.0227349
NC_030826.1.444.1	1946	153	0.7108	-0.393015	0.000984467
NC_030826.1.445.1	3100	381	0.6461	-0.0331032	0.0867153
NC_030826.1.460.1	1790	192	0.7047	0.0799382	0.0326784
NC_030826.1.464.1	1142	129	0.7355	-0.139411	0.00458176
NC_030826.1.467.1	740	234	0.5775	0.0667324	0.0336726
NC_030826.1.472.1	2980	393	0.4457	-0.0954343	0.03702
NC_030826.1.476.1	2578	222	0.7108	-0.425086	0.00161542
NC_030826.1.486.1	2960	345	0.7853	0.0443257	0.143495
NC_030826.1.488.1	996	201	0.6809	-0.425015	0.00129105
NC_030826.1.514.1	3264	204	0.7786	0.0719872	0.0403925
NC_030826.1.517.1	1096	126	0.8223	-0.299557	0.00203474
NC_030826.1.525.1	1645	171	1.0238	-0.111924	0.0204277
NC_030826.1.530.1	637	144	0.6447	-0.14314	0.00407766
NC_030826.1.543.1	2942	339	0.5198	-0.188544	0.0144567
NC_030826.1.544.1	599	120	0.8752	0.158347	0.0456271
NC_030826.1.550.1	3164	408	0.614	0.001081	0.125478
NC_030826.1.552.1	1787	465	0.6877	-0.0507891	0.205449
NC_030826.1.567.1	4153	201	0.8828	-0.56939	0.000775237
NC_030826.1.569.1	3181	225	0.6714	-0.266852	0.00403068
NC_030826.1.626.1	3014	234	0.6553	0.125029	0.0538832
NC_030826.1.636.1	2182	417	0.5072	0.00950438	0.112589
NC_030826.1.665.1	1578	135	0.7262	-0.15366	0.00421041
NC_030826.1.674.1	4064	207	0.5141	-0.166016	0.00373425
NC_030826.1.685.1	2070	348	0.364	-0.207937	0.00910904
NC_030826.1.686.1	2901	222	0.633	-0.222746	0.00470385
NC_030826.1.694.1	2045	258	0.9319	-0.0581979	0.0527543
NC_030826.1.695.1	1865	270	0.5327	-0.0350272	0.0208664
NC_030826.1.715.1	3450	321	0.9593	0.0379687	0.172065
NC_030826.1.725.1	466	198	1.1887	-0.0142179	0.087583
NC_030826.1.760.1	1732	156	0.9107	0.052428	0.0353009
NC_030826.1.762.1	2687	294	0.3678	-0.29206	0.00285989
NC_030826.1.77.1	3821	252	0.772	-0.120302	0.0184683
NC_030826.1.822.1	1714	189	0.8247	-0.101586	0.0142435
NC_030826.1.832.1	3207	228	0.6315	-0.271366	0.0035612
NC_030826.1.865.1	1945	240	0.6147	0.122452	0.0531336
NC_030826.1.866.1	3385	264	0.5629	0.00291719	0.0250802
NC_030826.1.87.1	2738	261	0.3983	-0.494194	0.000579513
NC_030826.1.875.1	3109	264	0.7914	-0.0908843	0.0280613
NC_030827.1.106.1	753	144	0.7733	-0.230341	0.00341256
NC_030827.1.112.1	2004	264	0.5746	-0.206871	0.00721193
NC_030827.1.116.1	2965	213	0.3947	-0.100906	0.00449568
NC_030827.1.127.1	2960	258	0.343	-0.538524	0.000347257
NC_030827.1.13.1	1617	141	0.928	0.0621712	0.0340785
NC_030827.1.135.1	1834	177	0.683	-0.338821	0.00168268
NC_030827.1.143.1	1713	174	0.7904	-0.248795	0.00415643
NC_030827.1.153.1	3881	177	0.5893	-0.103754	0.00520791
NC_030827.1.157.1	2937	195	0.616	0.11355	0.0298347
NC_030827.1.163.1	2617	366	0.4579	-0.0768824	0.0333225
NC_030827.1.178.1	735	168	0.9168	-0.37758	0.00263149
NC_030827.1.179.1	1694	222	0.4004	-0.16943	0.00346984
NC_030827.1.180.1	3795	261	0.6896	-0.24231	0.00711352
NC_030827.1.216.1	1046	294	0.5391	-0.243569	0.00742025
NC_030827.1.222.1	3700	216	0.6754	-0.26408	0.00365597
NC_030827.1.230.1	749	96	0.9653	-0.251712	0.00322548
NC_030827.1.240.1	4047	213	0.6207	-0.210028	0.00416767
NC_030827.1.242.1	1543	204	0.5389	-0.26688	0.00234326
NC_030827.1.247.1	3270	180	0.7929	-0.160967	0.00724003
NC_030827.1.249.1	1060	153	0.6921	-0.13852	0.00523522
NC_030827.1.25.1	1016	108	0.9387	-0.347335	0.0017703
NC_030827.1.250.1	3040	159	0.9151	-0.0208061	0.0213611
NC_030827.1.251.1	1943	126	0.7695	-0.263901	0.00207181
NC_030827.1.263.1	446	198	0.6414	-0.283143	0.00290778
NC_030827.1.264.1	1839	192	0.9207	-0.139513	0.0153519
NC_030827.1.271.1	1209	156	0.3558	-0.362221	0.000427418
NC_030827.1.277.1	1025	189	0.6717	-0.230155	0.00397061
NC_030827.1.279.1	1269	141	0.7443	-0.204387	0.00346906
NC_030827.1.28.1	3477	135	0.708	-0.0186965	0.00859982
NC_030827.1.281.1	2631	255	0.58	-0.0357257	0.019585
NC_030827.1.284.1	4628	345	0.8975	-0.240336	0.0318369
NC_030827.1.285.1	1677	246	0.6868	-0.155343	0.0120472
NC_030827.1.291.1	3328	210	0.7948	-0.255124	0.00540111
NC_030827.1.299.1	1386	153	0.6893	-0.210473	0.0031703
NC_030827.1.307.1	2742	168	0.745	-0.140826	0.00645732
NC_030827.1.311.1	1216	156	0.5826	-0.230247	0.00207897
NC_030827.1.316.1	1790	306	0.5928	-0.101872	0.0239566
NC_030827.1.332.1	511	186	0.7919	-0.111899	0.0125223
NC_030827.1.346.1	1770	243	0.8222	-0.0617473	0.0322487
NC_030827.1.44.1	1254	237	0.5311	-0.300112	0.00266881
NC_030827.1.49.1	1321	162	0.5891	-0.0710209	0.00640915
NC_030827.1.50.1	3332	156	0.4036	-0.376299	0.000397869
NC_030827.1.62.1	3401	279	0.6343	-0.262912	0.00649723
NC_030827.1.7.1	2985	258	0.5182	-0.252493	0.00395964
NC_030827.1.73.1	3488	198	0.5447	-0.461497	0.000550816
NC_030827.1.75.1	945	78	0.671	-0.343255	0.000570151
NC_030827.1.8.1	1998	156	0.6887	-0.34927	0.00126204
NC_030827.1.80.1	2817	177	0.5066	-0.317932	0.00104605
NC_030827.1.82.1	4477	222	0.5771	-0.269073	0.00264652
NC_030827.1.97.1	1332	90	0.6149	-0.253299	0.000962393
NC_030827.1.98.1	1554	255	0.5999	-0.288076	0.00427188
NC_030827.1.99.1	4645	399	0.7246	-0.20941	0.0402706
NC_030828.1.102.1	1897	285	0.5488	-0.253123	0.00619574
NC_030828.1.102.2	2587	285	0.5488	-0.253123	0.00594304
NC_030828.1.12.1	2817	285	0.7126	-0.255607	0.00961011
NC_030828.1.132.1	1915	186	0.6174	-0.279212	0.00222484
NC_030828.1.133.1	969	156	0.8755	-0.223673	0.005513
NC_030828.1.134.1	870	105	0.8341	-0.582991	0.000263035
NC_030828.1.135.1	1728	150	0.6276	-0.44992	0.00051094
NC_030828.1.136.1	782	123	0.9318	-0.404499	0.00141734
NC_030828.1.140.1	3612	180	0.6885	-0.0971056	0.00778294
NC_030828.1.16.1	692	198	0.3686	-0.367494	0.00069811
NC_030828.1.179.1	495	96	0.492	-0.445201	0.000206996
NC_030828.1.209.1	3857	198	0.5994	-0.35094	0.00132615
NC_030828.1.224.1	2748	186	0.7219	-0.0494115	0.0132445
NC_030828.1.228.2	1928	264	0.6741	-0.453912	0.00194875
NC_030828.1.246.1	3037	243	0.5055	-0.20272	0.00447729
NC_030828.1.250.1	2827	252	0.6584	-0.24517	0.00609568
NC_030828.1.261.1	2548	189	0.8896	-0.321292	0.00393293
NC_030828.1.274.1	694	294	0.8117	0.142792	0.187353
NC_030828.1.275.1	1681	249	0.8743	-0.161326	0.0213527
NC_030828.1.280.1	1842	252	0.4892	-0.12468	0.00840618
NC_030828.1.283.1	1255	138	0.6863	-0.0337387	0.00859859
NC_030828.1.285.1	3091	255	0.7643	-0.144737	0.0165966
NC_030828.1.286.1	1445	204	0.4889	-0.14013	0.00464112
NC_030828.1.295.1	1015	150	0.7394	-0.193277	0.00411204
NC_030828.1.298.1	812	66	0.875	-0.329162	0.00105128
NC_030828.1.31.1	2148	219	0.7023	-0.378253	0.00212816
NC_030828.1.319.1	638	84	0.9327	-0.0501408	0.00967962
NC_030828.1.362.1	3288	189	0.8865	-0.159053	0.0107938
NC_030828.1.365.1	1684	273	0.6464	-0.274148	0.00651804
NC_030828.1.366.1	3233	162	0.4718	-0.26515	0.00110151
NC_030828.1.378.1	2733	177	0.6422	-0.321796	0.00156852
NC_030828.1.379.1	3211	156	0.7732	-0.350396	0.00151723
NC_030828.1.384.1	1771	126	1.0147	-0.410152	0.0017229
NC_030828.1.410.1	2844	210	0.8116	-0.183218	0.00938884
NC_030828.1.416.1	4018	531	0.6012	-0.185799	0.125907
NC_030828.1.436.1	3705	390	0.638	0.0157739	0.119562
NC_030828.1.448.1	2773	270	0.6368	0.035778	0.0427336
NC_030828.1.76.1	4198	171	0.8098	0.0275427	0.0223835
NC_030828.1.78.1	1435	168	0.8666	-0.0388799	0.0198102
NC_030828.1.84.1	3479	144	1.0306	-0.266993	0.00508703
NC_030828.1.95.1	2877	369	0.4807	-0.0861205	0.0342129
NC_030829.1.104.1	3581	306	0.573	-0.196772	0.010935
NC_030829.1.109.1	1294	159	1.2019	-0.2161	0.0161925
NC_030829.1.118.1	1013	231	0.6338	-0.311603	0.00324665
NC_030829.1.124.1	1427	207	0.6989	-0.0118214	0.021297
NC_030829.1.126.1	3954	369	0.5151	-0.135428	0.0260029
NC_030829.1.127.1	838	126	0.9431	0.056574	0.0308046
NC_030829.1.132.1	1890	246	0.8523	-0.268229	0.0095175
NC_030829.1.189.1	2808	192	0.4275	-0.266763	0.00134548
NC_030829.1.220.1	2946	141	0.7205	0.00267711	0.0113192
NC_030829.1.228.1	1756	120	0.653	-0.537448	0.000224167
NC_030829.1.24.1	3907	303	1.053	0.0438798	0.188469
NC_030829.1.245.1	3390	450	0.5747	0.00447406	0.167667
NC_030829.1.246.1	1799	315	0.5129	-0.0715447	0.025055
NC_030829.1.251.1	4333	318	0.7747	-0.0215154	0.0672415
NC_030829.1.252.1	1756	420	0.7158	0.0740115	0.283952
NC_030829.1.264.1	2305	147	0.8601	-0.387227	0.00149851
NC_030829.1.266.1	3357	306	0.4593	-0.232098	0.00617124
NC_030829.1.286.1	2695	168	0.5702	-0.2881	0.00142125
NC_030829.1.288.1	2697	285	0.7048	-0.355329	0.00491313
NC_030829.1.291.1	1910	123	0.6414	-0.312484	0.000976126
NC_030829.1.293.1	3776	471	0.4116	-0.0661695	0.0849033
NC_030829.1.293.2	3314	210	0.5026	-0.502507	0.000423601
NC_030829.1.294.1	3489	228	0.6736	-0.414898	0.00155209
NC_030829.1.313.1	3323	312	0.8187	0.00163661	0.0876802
NC_030829.1.328.1	3228	183	0.3938	-0.267584	0.00106495
NC_030829.1.329.1	2015	186	0.9252	0.00543344	0.0367753
NC_030829.1.35.1	1224	231	0.7729	-0.0199389	0.0330238
NC_030829.1.354.1	3208	393	0.5195	-0.18372	0.0259968
NC_030829.1.360.1	1714	183	0.5942	-0.316368	0.00158706
NC_030829.1.372.1	3840	282	0.7246	-0.196802	0.0133358
NC_030829.1.378.1	2742	297	0.4898	-0.000799458	0.0287858
NC_030829.1.379.1	3291	306	0.6279	-0.228164	0.010751
NC_030829.1.38.1	2944	297	0.3713	-0.231348	0.00438385
NC_030829.1.387.1	2817	198	0.4895	-0.419308	0.000637259
NC_030829.1.388.1	2197	135	0.9264	-0.0179635	0.0183678
NC_030829.1.389.1	3762	330	0.5724	-0.176955	0.0158698
NC_030829.1.390.1	2747	135	0.6001	-0.448146	0.000379042
NC_030829.1.391.1	3171	243	0.6938	-0.17731	0.00944308
NC_030829.1.392.1	3696	270	0.7315	-0.242592	0.00896414
NC_030829.1.394.1	2807	363	1.0544	-0.150467	0.116782
NC_030829.1.396.1	4008	213	0.8395	-0.36652	0.00295992
NC_030829.1.40.1	3392	294	0.7422	0.0432172	0.0753744
NC_030829.1.405.1	1653	129	0.5599	-0.329616	0.000731524
NC_030829.1.410.1	2184	213	0.5804	-0.143961	0.00634627
NC_030829.1.412.1	4225	237	0.4603	-0.228853	0.00285503
NC_030829.1.414.1	1637	129	0.6527	-0.305711	0.00114721
NC_030829.1.418.1	2739	264	0.778	-0.240988	0.010399
NC_030829.1.421.1	2130	246	0.693	-0.235352	0.00708209
NC_030829.1.428.1	3423	171	0.4423	-0.326404	0.000730307
NC_030829.1.440.1	3862	240	0.8579	-0.0568204	0.0317912
NC_030829.1.441.1	860	267	0.487	-0.192733	0.00666121
NC_030829.1.447.1	3377	213	0.8508	-0.387789	0.00276971
NC_030829.1.478.1	477	438	0.6847	0.0504177	0.287785
NC_030829.1.495.1	1592	225	0.7035	-0.398644	0.00206081
NC_030829.1.515.1	1220	69	0.6449	-0.523312	0.000142809
NC_030829.1.523.1	916	150	0.8506	0.070307	0.0324829
NC_030829.1.526.1	1250	195	0.8669	-0.370143	0.00306509
NC_030829.1.534.1	1873	177	1.1279	-0.0740859	0.0376048
NC_030829.1.538.1	391	84	0.6494	-0.280324	0.000890448
NC_030829.1.549.1	1735	129	0.9216	-0.294152	0.00286009
NC_030829.1.552.1	1460	432	0.5796	-0.00402641	0.151819
NC_030829.1.56.1	979	222	0.4097	-0.234197	0.0024355
NC_030829.1.72.1	4235	318	0.9639	-0.0580444	0.0935848
NC_030829.1.75.1	1396	114	0.7233	-0.21815	0.00220048
NC_030829.1.81.1	3566	264	0.7538	0.221447	0.164017
NC_030829.1.83.1	3156	360	0.887	0.0877957	0.263135
NC_030829.1.92.1	3053	162	0.5869	-0.324063	0.00108361
NC_030830.1.115.1	725	147	0.7582	0.0979124	0.0286674
NC_030830.1.115.2	3202	426	0.7117	-0.0118083	0.178378
NC_030830.1.115.3	2777	249	0.828	-0.0559252	0.0341876
NC_030830.1.115.4	3356	243	0.7161	-0.199655	0.00864849
NC_030830.1.115.5	3813	426	0.7117	-0.0118083	0.173006
NC_030830.1.115.7	2920	306	0.4496	0.0400746	0.0359642
NC_030830.1.117.1	626	210	0.7177	-0.251803	0.00510718
NC_030830.1.12.1	2651	396	0.7019	-0.0375483	0.117222
NC_030830.1.120.1	330	111	0.6975	-0.210168	0.00220912
NC_030830.1.123.1	3578	366	0.4703	0.0471073	0.071201
NC_030830.1.124.1	939	168	0.7788	-0.221953	0.00469745
NC_030830.1.125.1	3260	186	0.5346	-0.0608834	0.00665205
NC_030830.1.127.1	3235	162	0.5261	-0.373411	0.000639444
NC_030830.1.152.1	2770	207	0.7986	-0.295891	0.00418728
NC_030830.1.182.1	1760	159	0.4692	-0.379077	0.000545462
NC_030830.1.189.1	1592	312	0.9279	0.0903002	0.212706
NC_030830.1.19.1	3537	147	0.7952	-0.181431	0.00439998
NC_030830.1.194.1	841	159	0.9154	0.142958	0.0685689
NC_030830.1.210.2	2977	201	0.6562	-0.599772	0.000334438
NC_030830.1.210.3	3242	201	0.5737	-0.249632	0.0025573
NC_030830.1.242.1	3565	216	0.6242	-0.323502	0.00212315
NC_030830.1.249.1	3540	168	0.534	-0.023952	0.00685557
NC_030830.1.264.1	2753	204	0.5416	-0.445636	0.000675705
NC_030830.1.266.1	547	129	0.443	-0.33117	0.000536424
NC_030830.1.272.1	2997	231	0.748	-0.488732	0.00128205
NC_030830.1.273.1	2735	159	0.6459	-0.236323	0.00229477
NC_030830.1.278.1	1253	174	0.6194	-0.15153	0.00474415
NC_030830.1.31.1	2705	222	0.4243	-0.35552	0.00103211
NC_030830.1.327.1	786	186	0.4782	-0.0635662	0.00636309
NC_030830.1.33.1	851	333	0.6438	-0.0346013	0.0598645
NC_030830.1.34.1	3391	156	0.7874	-0.300324	0.00218257
NC_030830.1.36.1	2050	144	1.0187	-0.0181765	0.0270199
NC_030830.1.362.1	1420	81	0.9478	-0.0283359	0.0108089
NC_030830.1.363.1	2311	237	0.688	-0.138431	0.0118072
NC_030830.1.366.1	4249	258	1.0038	-0.117329	0.0396868
NC_030830.1.370.1	2044	414	0.6892	-0.0468003	0.131412
NC_030830.1.395.1	1697	186	0.488	-0.140584	0.00374387
NC_030830.1.406.1	3802	192	0.9823	0.0252888	0.0474893
NC_030830.1.410.1	931	144	1.0548	0.0276019	0.0431002
NC_030830.1.420.1	1611	255	0.6561	-0.187567	0.009808
NC_030830.1.422.1	3710	186	0.5743	-0.197206	0.00299202
NC_030830.1.423.1	3342	135	0.5027	-0.420343	0.000323472
NC_030830.1.445.1	2770	237	0.7955	0.018438	0.0438744
NC_030830.1.452.1	3665	249	0.5449	-0.295265	0.00282972
NC_030830.1.452.2	2735	249	0.5449	-0.295265	0.00299361
NC_030830.1.452.3	3317	249	0.5449	-0.295265	0.00288997
NC_030830.1.462.1	3834	321	0.9326	-0.112219	0.0647744
NC_030830.1.465.1	3071	174	0.4896	-0.382156	0.00061887
NC_030830.1.467.1	4255	273	0.5875	0.00452731	0.0285294
NC_030830.1.468.1	1037	135	0.8289	-0.24355	0.00332172
NC_030830.1.470.1	1182	294	0.7062	-0.09835	0.0316599
NC_030831.1.104.1	1182	159	1.0443	-0.057621	0.0279523
NC_030831.1.107.1	2698	402	0.8141	0.0799058	0.303861
NC_030831.1.11.1	1269	225	0.9084	-0.085854	0.0306493
NC_030831.1.131.1	2932	198	0.8641	-0.0493956	0.0230813
NC_030831.1.155.1	3488	177	0.6958	-0.428375	0.000877841
NC_030831.1.158.1	3680	291	0.6972	-0.198958	0.0134242
NC_030831.1.159.1	3078	243	0.5564	-0.324828	0.00234522
NC_030831.1.162.1	1480	102	0.7169	-0.335461	0.000869809
NC_030831.1.163.1	2994	273	0.479	-0.345632	0.00222867
NC_030831.1.175.1	1465	489	0.4215	-0.144813	0.0737322
NC_030831.1.204.1	1617	357	0.811	-0.218312	0.0381043
NC_030831.1.206.1	3401	363	0.612	-0.347421	0.00857995
NC_030831.1.207.1	644	192	0.5529	-0.0994232	0.00683116
NC_030831.1.227.1	4478	336	0.8924	-0.276268	0.0228379
NC_030831.1.230.1	1378	156	0.8429	-0.0413506	0.0160068
NC_030831.1.240.1	1935	219	1.0408	-0.236131	0.0157425
NC_030831.1.25.1	2668	234	0.4015	-0.034135	0.00907749
NC_030831.1.258.1	2804	207	0.6654	-0.0275106	0.0159831
NC_030831.1.260.1	1903	327	0.5045	-0.0717158	0.0275074
NC_030831.1.287.1	1949	237	0.7018	-0.000222796	0.0307893
NC_030831.1.288.1	3518	204	0.7038	-0.275712	0.00328863
NC_030831.1.295.1	3507	192	0.4389	-0.409812	0.000520214
NC_030831.1.296.1	4004	306	1.0182	-0.111904	0.0710057
NC_030831.1.300.1	1635	177	0.5439	-0.230346	0.0022503
NC_030831.1.306.1	2709	327	0.7581	0.000718575	0.0879199
NC_030831.1.308.1	2864	261	0.6928	-0.0831111	0.0214377
NC_030831.1.311.1	2728	336	0.6091	-0.112869	0.0304349
NC_030831.1.32.1	2992	144	0.7867	-0.237187	0.00297087
NC_030831.1.328.1	1762	165	0.7053	-0.33759	0.00160527
NC_030831.1.329.1	1763	195	0.5087	-0.0691563	0.00700603
NC_030831.1.341.1	2013	330	1.0084	-0.0630629	0.130189
NC_030831.1.41.1	1577	177	0.7719	-0.151396	0.00774224
NC_030831.1.51.1	4112	204	0.7407	-0.427497	0.0013102
NC_030831.1.54.1	1456	207	0.5713	-0.28005	0.00246942
NC_030831.1.55.1	2005	225	0.8091	-0.0330045	0.03042
NC_030831.1.58.1	1805	174	0.451	-0.0290962	0.00605773
NC_030831.1.6.1	693	111	1.0859	-0.0433306	0.0216022
NC_030831.1.7.1	1579	192	0.6095	-0.0967856	0.0078378
NC_030831.1.74.1	1914	210	0.7115	-0.304612	0.00327439
NC_030831.1.83.1	2947	303	0.5691	-0.0177624	0.0345869
NC_030831.1.85.1	1870	180	0.8488	-0.23885	0.00562751
NC_030831.1.94.1	502	123	0.7848	0.0478905	0.0177138
NC_030832.1.103.1	3523	267	0.518	-0.329583	0.0025411
NC_030832.1.117.1	2587	309	0.4579	-0.0153757	0.027226
NC_030832.1.123.1	521	120	0.5691	0.0359924	0.00811893
NC_030832.1.17.1	2730	390	0.5779	0.221935	0.31755
NC_030832.1.183.1	3061	441	0.5558	-0.0766076	0.0932738
NC_030832.1.187.1	3285	222	0.4874	-0.206068	0.00325169
NC_030832.1.195.1	3178	288	1.001	0.0917334	0.193827
NC_030832.1.198.1	3521	270	0.894	-0.0257708	0.0599301
NC_030832.1.200.1	690	354	0.7154	-0.12046	0.0542162
NC_030832.1.218.1	1485	387	0.6541	-0.115785	0.0622543
NC_030832.1.219.1	3597	435	0.4145	-0.337127	0.0106053
NC_030832.1.257.1	2914	141	0.7698	-0.34955	0.00130716
NC_030832.1.260.1	1651	123	0.771	0.299135	0.0779999
NC_030832.1.269.1	3219	420	0.8796	-0.0506735	0.210428
NC_030832.1.343.1	3046	171	0.5849	-0.108744	0.00490154
NC_030832.1.345.1	1321	231	0.7285	-0.123655	0.0146708
NC_030832.1.352.1	1138	318	0.7072	-0.179383	0.0243575
NC_030832.1.358.1	998	285	0.7343	0.019309	0.0665124
NC_030832.1.363.1	4228	252	0.5543	-0.241246	0.00415077
NC_030832.1.363.2	2832	114	0.7871	-0.309507	0.00134934
NC_030832.1.363.3	1977	249	0.6414	-0.196079	0.0081288
NC_030832.1.373.1	2053	231	0.7019	-0.0894483	0.0161541
NC_030832.1.376.1	1716	225	0.8145	-0.213997	0.00973502
NC_030832.1.379.1	2781	222	0.689	-0.0533747	0.017071
NC_030832.1.380.1	3012	174	0.7131	-0.420414	0.000973362
NC_030832.1.384.1	2292	165	0.9331	-0.171933	0.00941907
NC_030832.1.391.1	1676	210	0.5854	-0.0205965	0.014416
NC_030832.1.407.1	2689	294	0.5395	-0.327453	0.00387843
NC_030832.1.419.1	1607	252	0.6095	0.0539881	0.039224
NC_030832.1.420.1	569	108	0.5466	-0.41261	0.000345344
NC_030832.1.424.1	2235	228	0.6196	-0.0640086	0.0141555
NC_030832.1.471.1	3226	252	0.4241	-0.295637	0.00205043
NC_030832.1.482.1	1049	228	0.7647	-0.177595	0.011369
NC_030832.1.52.1	4090	189	0.7826	-0.0686537	0.013437
NC_030833.1.116.1	628	150	0.7018	-0.337453	0.00144779
NC_030833.1.120.1	2687	420	0.8491	0.0643926	0.348382
NC_030833.1.126.1	3215	204	0.7964	-0.132321	0.0114538
NC_030833.1.145.1	3163	147	0.6736	-0.408625	0.000687928
NC_030833.1.166.1	1706	153	0.6976	-0.283116	0.00197792
NC_030833.1.170.1	811	72	0.763	-0.0512273	0.00492441
NC_030833.1.173.1	3113	195	0.6208	-0.295243	0.00207351
NC_030833.1.195.1	462	126	0.659	-0.383845	0.000726571
NC_030833.1.202.1	910	168	0.9515	-0.188016	0.0100749
NC_030833.1.212.1	2805	399	0.5466	-0.122364	0.0454833
NC_030833.1.218.1	1619	174	0.8315	-0.158288	0.0086071
NC_030833.1.221.1	2076	375	0.5487	-0.284133	0.0131182
NC_030833.1.224.1	3614	459	0.7863	-0.07002	0.206598
NC_030833.1.235.1	1421	138	0.9463	-0.404908	0.00167324
NC_030833.1.252.1	2869	207	0.5445	-0.301304	0.00181178
NC_030833.1.254.1	1905	273	0.4201	-0.247162	0.00378501
NC_030833.1.261.1	2864	255	0.7547	-0.109068	0.0205789
NC_030833.1.264.1	1328	183	1.1425	-0.0340827	0.0554965
NC_030833.1.273.1	2847	192	0.619	-0.172115	0.00456197
NC_030833.1.286.1	1708	168	0.8884	-0.0885814	0.0151009
NC_030833.1.288.1	1609	207	0.5864	-0.336965	0.00176309
NC_030833.1.314.1	3954	447	0.4951	-0.162381	0.0465002
NC_030833.1.340.2	3467	246	0.4724	-0.395644	0.00113988
NC_030833.1.347.1	3559	240	0.7594	-0.0533435	0.0244974
NC_030833.1.348.1	3494	357	0.9425	0.00713813	0.191413
NC_030833.1.349.1	1508	153	0.6407	-0.279918	0.00171032
NC_030833.1.351.1	1756	330	0.5741	0.0119874	0.0599332
NC_030833.1.353.1	2898	162	0.9408	-0.135367	0.0114396
NC_030833.1.362.1	4504	249	0.7333	-0.0843675	0.0192407
NC_030833.1.362.2	2863	249	0.7333	-0.0843675	0.0212138
NC_030833.1.373.1	3234	249	0.7792	-0.145232	0.0161139
NC_030833.1.378.1	3133	267	0.4218	-0.191779	0.00476662
NC_030833.1.386.1	1730	285	0.6836	-0.0952475	0.0265547
NC_030833.1.39.1	1583	180	0.4456	-0.149433	0.00291932
NC_030833.1.391.1	2727	207	1.2175	0.11153	0.188045
NC_030833.1.393.1	1864	246	0.6058	-0.185356	0.00760884
NC_030833.1.397.1	3206	174	0.3854	-0.118648	0.00251546
NC_030833.1.399.1	1984	159	0.6209	-0.182738	0.00316012
NC_030833.1.40.1	1743	189	1.0181	-0.250601	0.00980434
NC_030833.1.403.1	1704	108	0.72	-0.0798536	0.00497807
NC_030833.1.404.1	334	69	0.7446	-0.238281	0.00135187
NC_030833.1.42.1	696	198	0.4898	-0.360033	0.00107258
NC_030833.1.60.1	1301	192	0.6269	-0.390908	0.0012156
NC_030833.1.68.1	669	171	0.973	-0.206497	0.0100013
NC_030833.1.69.1	3939	243	0.599	-0.0383363	0.0166278
NC_030833.1.7.1	3071	483	0.4851	0.00151305	0.178409
NC_030833.1.75.1	2389	213	0.7335	-0.236594	0.00550521
NC_030833.1.82.1	1505	225	0.638	-0.125366	0.0101628
NC_030833.1.87.1	805	177	0.6941	-0.563553	0.000421147
NC_030833.1.89.1	873	135	0.912	-0.133173	0.00897645
NC_030833.1.9.1	3119	276	0.5987	-0.0373787	0.0248931
NC_030834.1.103.1	3711	237	0.6352	-0.119722	0.0104098
NC_030834.1.116.1	956	243	0.6488	-0.13121	0.0126732
NC_030834.1.118.1	1472	174	0.5655	-0.308145	0.00140997
NC_030834.1.12.1	1657	234	0.5046	0.00756713	0.0174265
NC_030834.1.121.1	2600	171	0.4751	-0.178707	0.00225324
NC_030834.1.128.1	3135	447	0.5981	0.0431119	0.215755
NC_030834.1.129.1	1695	168	0.9002	-0.376379	0.0023757
NC_030834.1.137.1	963	123	0.8448	-0.0956732	0.00813924
NC_030834.1.140.1	2779	285	0.4376	-0.0657594	0.0141533
NC_030834.1.148.1	4312	333	0.7698	-0.0141945	0.0806561
NC_030834.1.15.1	2122	168	0.8337	-0.15352	0.00813399
NC_030834.1.175.1	2211	186	0.6646	-0.15017	0.00591978
NC_030834.1.19.1	1757	108	0.9219	-0.495411	0.00060464
NC_030834.1.199.1	3049	147	0.8006	-0.309775	0.00198028
NC_030834.1.199.2	1042	147	0.8006	-0.309775	0.00223635
NC_030834.1.209.1	1730	138	1.0839	-0.0689423	0.0227639
NC_030834.1.214.1	1701	210	0.8516	-0.117036	0.0175196
NC_030834.1.220.1	631	84	0.9718	-0.163335	0.00520929
NC_030834.1.26.1	1708	384	0.8685	-0.0371585	0.172864
NC_030834.1.31.1	1219	204	0.875	-0.0115449	0.0358348
NC_030834.1.4.1	2568	285	0.5708	-0.184466	0.00999137
NC_030834.1.78.1	1653	303	0.6711	-0.0969405	0.0306854
NC_030834.1.81.1	2996	249	0.5597	0.0348955	0.0266553
NC_030834.1.82.1	2780	180	0.6944	-0.0244117	0.0134002
NC_030834.1.83.1	2320	129	0.6725	-0.288198	0.0013146
NC_030834.1.86.1	3479	219	0.7605	-0.123765	0.012517
NC_030834.1.9.1	2570	195	0.7431	-0.0577772	0.0149005
NC_030834.1.98.1	1888	189	0.7755	-0.22217	0.00549499
NC_030835.1.106.1	2796	246	0.6284	-0.268321	0.0044777
NC_030835.1.108.1	1572	189	0.9482	-0.0193815	0.0356501
NC_030835.1.109.1	1829	168	1.0089	-0.0411459	0.0295025
NC_030835.1.113.1	3610	324	0.3647	-0.258631	0.00461035
NC_030835.1.116.1	2800	252	0.5148	-0.0615187	0.0129828
NC_030835.1.125.1	3068	228	0.6518	-0.111093	0.010947
NC_030835.1.130.1	3552	231	0.6856	-0.132807	0.0105837
NC_030835.1.140.1	2746	468	0.6356	-0.0300856	0.196965
NC_030835.1.165.1	3139	315	0.588	0.0127773	0.0497374
NC_030835.1.168.1	2101	249	0.615	-0.0733556	0.0165549
NC_030835.1.172.1	2803	156	0.6733	-0.27772	0.00183547
NC_030835.1.177.1	2542	270	1.0045	-0.0156948	0.092825
NC_030835.1.19.1	3045	351	0.6854	-0.304337	0.0128338
NC_030835.1.193.1	2597	279	0.9926	-0.0589416	0.075259
NC_030835.1.195.1	3423	432	0.651	-0.121702	0.0837688
NC_030835.1.196.1	3450	186	0.8796	0.0870376	0.049403
NC_030835.1.198.1	1713	123	0.769	-0.607256	0.000210822
NC_030835.1.201.1	1227	126	1.0755	-0.060639	0.0212416
NC_030835.1.204.1	2822	258	0.563	-0.164414	0.00819951
NC_030835.1.208.1	2988	351	0.6235	-0.00675376	0.0711601
NC_030835.1.211.1	682	192	0.8575	-0.159447	0.0118797
NC_030835.1.242.1	2183	129	1.0557	-0.108859	0.0142519
NC_030835.1.253.2	1733	114	0.8055	-0.061869	0.00778892
NC_030835.1.261.1	2075	123	1.0888	-0.104945	0.0152925
NC_030835.1.262.1	2070	180	0.8612	-0.436905	0.00156974
NC_030835.1.264.1	1605	168	0.5832	-0.434873	0.000600692
NC_030835.1.289.1	3391	258	0.6051	-0.125058	0.011683
NC_030835.1.293.1	1520	189	0.5439	-0.470117	0.000530693
NC_030835.1.295.1	3241	171	0.6194	-0.394448	0.000821886
NC_030835.1.315.1	2954	324	0.6513	-0.153211	0.0232374
NC_030835.1.318.1	2857	312	0.7326	-0.0451523	0.0524786
NC_030835.1.324.1	2902	246	0.7216	-0.229357	0.00768697
NC_030835.1.33.1	2898	435	0.4905	0.0739521	0.17648
NC_030835.1.333.1	614	165	0.4587	-0.223584	0.00168343
NC_030835.1.36.1	2662	267	0.7085	-0.184724	0.0125505
NC_030835.1.44.1	1591	180	0.543	-0.433574	0.000608465
NC_030835.1.45.1	1242	159	0.861	-0.277395	0.0037602
NC_030835.1.47.1	1243	189	0.4705	-0.345075	0.000978013
NC_030835.1.50.1	1694	81	0.8985	-0.29923	0.00153665
NC_030835.1.63.1	1735	213	0.7286	-0.151021	0.00988079
NC_030835.1.68.1	3565	312	0.6208	-0.0373567	0.0378248
NC_030835.1.86.1	3371	186	0.5477	-0.0889983	0.0057239
NC_030835.1.89.2	1860	249	0.4762	-0.334418	0.00196656
NC_030835.1.93.1	1624	177	0.7328	-0.478541	0.000792952
NC_030835.1.99.1	2636	153	1.1224	-0.22984	0.0100136
NC_030836.1.10.1	999	120	0.482	-0.37732	0.000394709
NC_030836.1.107.1	717	135	0.9452	-0.0773067	0.0144644
NC_030836.1.112.1	826	165	0.8808	-0.206269	0.00698091
NC_030836.1.128.5	1671	318	0.9176	-0.107722	0.0698878
NC_030836.1.128.6	1741	246	0.8065	-0.177179	0.0150863
NC_030836.1.128.7	1912	246	0.8065	-0.177179	0.0149328
NC_030836.1.128.8	811	246	0.8065	-0.177179	0.0159488
NC_030836.1.128.9	1282	279	0.8793	0.0488034	0.111716
NC_030836.1.140.1	738	57	0.4919	-0.242795	0.000508797
NC_030836.1.16.1	791	117	0.446	-0.172173	0.00133777
NC_030836.1.180.2	1577	279	0.7441	0.0267983	0.0652943
NC_030836.1.180.3	556	135	0.6268	0.0756316	0.0147399
NC_030836.1.180.5	659	390	0.6965	0.0981498	0.252759
NC_030836.1.186.1	1307	162	0.5998	-0.24001	0.00218299
NC_030836.1.196.1	2782	273	0.4679	-0.225234	0.00481496
NC_030836.1.20.1	583	360	0.6885	0.145816	0.247106
NC_030836.1.200.1	1669	120	0.6788	-0.390422	0.000644871
NC_030836.1.205.1	421	57	0.691	-0.181409	0.00145274
NC_030836.1.208.1	3088	189	0.8131	-0.187789	0.00720228
NC_030836.1.209.1	3038	120	0.7298	-0.336692	0.000992838
NC_030836.1.213.1	2696	225	0.9103	-0.0510041	0.0354138
NC_030836.1.226.1	722	444	0.7064	-0.099654	0.144448
NC_030836.1.232.1	1177	192	0.9262	-0.367738	0.0036462
NC_030836.1.254.1	2605	177	0.801	-0.0341501	0.0171212
NC_030836.1.263.1	426	183	0.7925	-0.159915	0.00892392
NC_030836.1.280.1	1785	165	1.0214	-0.138016	0.0159314
NC_030836.1.3.1	1707	144	0.9602	0.128842	0.0586302
NC_030836.1.325.2	1795	153	0.935	-0.0551701	0.0183748
NC_030836.1.325.4	1572	153	0.935	-0.0551701	0.0186206
NC_030836.1.325.44	3568	174	0.7725	-0.104302	0.00906888
NC_030836.1.325.51	463	147	0.9223	-0.0974062	0.0136404
NC_030836.1.325.52	1600	159	0.6324	-0.19857	0.00302123
NC_030836.1.325.53	1827	159	0.6324	-0.19857	0.00298
NC_030836.1.325.54	3305	159	0.6324	-0.19857	0.00272491
NC_030836.1.325.62	3112	159	0.6324	-0.19857	0.00275695
NC_030836.1.325.6	1794	153	0.935	-0.0551701	0.0183759
NC_030836.1.325.68	1680	159	0.6324	-0.19857	0.00300664
NC_030836.1.325.78	1684	153	0.935	-0.0551701	0.0184968
NC_030836.1.325.79	1682	153	0.935	-0.0551701	0.018499
NC_030836.1.325.80	1634	153	0.935	-0.0551701	0.018552
NC_030836.1.325.81	1681	153	0.935	-0.0551701	0.0185001
NC_030836.1.325.82	1719	153	0.935	-0.0551701	0.0184582
NC_030836.1.325.83	1705	153	0.935	-0.0551701	0.0184736
NC_030836.1.325.84	1673	153	0.935	-0.0551701	0.0185089
NC_030836.1.325.85	1101	153	0.935	-0.0551701	0.0191505
NC_030836.1.325.88	2081	159	0.6324	-0.19857	0.00293453
NC_030836.1.327.3	1792	198	0.8192	-0.205047	0.00780686
NC_030836.1.327.4	1706	198	0.8192	-0.205047	0.00784741
NC_030836.1.394.1	1632	396	0.6954	-0.0144834	0.138802
NC_030836.1.4.1	837	150	0.5744	-0.288974	0.00131953
NC_030836.1.44.1	3416	147	0.4357	-0.218905	0.00112219
NC_030836.1.83.1	3436	204	0.6624	-0.140809	0.00704482
NC_030836.1.9.1	1747	198	0.358	-0.357704	0.000675649
NW_017189516.1.1.1	1578	87	0.8797	-0.144403	0.00431414
NW_017189516.1.10.1	3767	237	0.5328	-0.347595	0.00168517
NW_017189516.1.100.1	2877	201	0.708	-0.0449131	0.0152101
NW_017189516.1.104.1	1012	219	0.7995	-0.605112	0.000692984
NW_017189516.1.145.1	4159	225	0.8356	-0.0414905	0.0275098
NW_017189516.1.145.2	1781	240	0.6984	-0.145415	0.0124196
NW_017189516.1.15.1	817	183	0.8791	-0.499638	0.00122363
NW_017189516.1.157.1	3145	195	0.5791	-0.160503	0.00440858
NW_017189516.1.161.1	3179	243	0.8263	0.00777848	0.0467471
NW_017189516.1.183.1	967	357	0.3834	-0.0779829	0.0264397
NW_017189516.1.193.1	3130	186	0.9789	-0.104951	0.019972
NW_017189516.1.194.1	3738	192	0.7941	-0.488687	0.000929883
NW_017189516.1.202.1	1001	108	0.5341	-0.265628	0.000853176
NW_017189516.1.209.1	1786	207	0.6104	-0.595848	0.000340918
NW_017189516.1.213.1	2720	156	0.7273	-0.3045	0.0018316
NW_017189516.1.215.1	2662	186	0.8569	-0.142028	0.0110638
NW_017189516.1.217.1	1752	144	0.7566	-0.341262	0.00146804
NW_017189516.1.219.1	2680	144	0.8166	0.0225382	0.0181956
NW_017189516.1.220.1	4306	198	0.6342	-0.288029	0.002179
NW_017189516.1.229.1	2558	267	0.5665	-0.249148	0.00532202
NW_017189516.1.231.1	2930	192	0.5584	-0.285285	0.00178229
NW_017189516.1.233.1	4139	186	0.6989	-0.218375	0.00374667
NW_017189516.1.234.1	3212	228	1.0217	-0.326066	0.00841276
NW_017189516.1.239.1	4613	198	0.6931	-0.250934	0.00328412
NW_017189516.1.242.2	2182	393	0.3756	-0.351444	0.00593661
NW_017189516.1.244.1	1044	78	0.8329	-0.489986	0.000357811
NW_017189516.1.248.1	1850	168	0.6168	-0.272814	0.00191495
NW_017189516.1.254.1	1112	99	0.4961	-0.513325	0.000133066
NW_017189516.1.256.1	3117	129	0.5295	-0.389003	0.000411143
NW_017189516.1.264.1	4064	297	0.7681	-0.278694	0.0103608
NW_017189516.1.267.1	2801	300	0.7102	-0.154213	0.0216634
NW_017189516.1.274.1	3654	168	0.9576	-0.333446	0.00335073
NW_017189516.1.277.1	3593	195	0.7617	-0.338983	0.0023484
NW_017189516.1.282.1	3223	183	0.4009	-0.293784	0.000916405
NW_017189516.1.283.1	1137	168	0.666	-0.247211	0.00276148
NW_017189516.1.284.1	4439	408	0.6062	-0.180068	0.0377062
NW_017189516.1.293.1	3794	204	0.3681	-0.306026	0.000924213
NW_017189516.1.294.1	3741	219	1.1018	-0.0365684	0.0608867
NW_017189516.1.296.1	3704	240	0.5743	-0.192757	0.00551236
NW_017189516.1.304.1	3898	198	0.8138	-0.0862205	0.0146984
NW_017189516.1.306.1	717	90	0.7739	-0.102827	0.00443081
NW_017189516.1.312.1	763	90	1.0146	-0.111474	0.00885085
NW_017189516.1.316.1	1731	228	0.8396	-0.14813	0.0166759
NW_017189516.1.322.1	3778	294	0.5437	-0.111936	0.0150914
NW_017189516.1.327.1	4180	327	0.5879	0.00605702	0.0507803
NW_017189516.1.337.1	2910	321	0.6244	-0.143214	0.0221664
NW_017189516.1.34.1	1900	120	0.8058	-0.124498	0.00545875
NW_017189516.1.48.1	1043	246	0.9624	-0.00228759	0.0764323
NW_017189516.1.5.1	3261	222	0.4658	-0.468668	0.000538847
NW_017189516.1.79.1	859	129	0.4344	-0.254263	0.000851004
NW_017189516.1.82.1	2974	135	1.0419	-0.0358919	0.0222858
NW_017189516.1.84.1	4047	231	0.5563	-0.16973	0.00538956
NW_017189516.1.86.1	2777	270	0.6447	-0.141256	0.0140169
NW_017189517.1.119.1	1796	228	0.8605	-0.0309224	0.0376373
NW_017189517.1.12.1	1756	117	0.8657	-0.487131	0.000589985
NW_017189517.1.123.1	1655	159	0.5439	-0.285728	0.00128473
NW_017189517.1.124.1	1636	333	0.4782	-0.222267	0.0103439
NW_017189517.1.127.1	476	201	0.8283	-0.145441	0.0132498
NW_017189517.1.13.1	2803	258	0.8058	-0.03582	0.0398339
NW_017189517.1.133.1	1857	129	0.3706	-0.226293	0.000788473
NW_017189517.1.39.1	2503	201	0.3816	-0.481101	0.000317982
NW_017189517.1.59.1	2887	189	0.7032	-0.198514	0.00482052
NW_017189517.1.60.1	3051	207	0.7662	-0.244666	0.00520894
NW_017189517.1.62.1	2714	354	0.3611	-0.310873	0.00471486
NW_017189517.1.64.1	1531	192	0.7448	-0.133028	0.00945045
NW_017189517.1.66.1	2113	195	0.544	-0.236958	0.00254216
NW_017189517.1.68.1	3601	201	0.703	-0.347448	0.00197028
NW_017189517.1.73.1	716	135	0.9775	-0.246094	0.00530199
NW_017189517.1.78.1	3161	156	0.6738	-0.062707	0.00739759
NW_017189517.1.8.1	837	126	0.6439	-0.441557	0.000462826
NW_017189519.1.2.1	2897	417	0.6133	-0.125305	0.0650896
NW_017189531.1.1.1	2964	195	0.8515	0.00753173	0.0309637
NW_017189549.1.1.1	485	96	0.6303	-0.231543	0.0013095
NW_017189549.1.2.1	540	63	1.0744	-0.16189	0.0058137
NW_017189573.1.1.1	1831	153	0.8028	-0.208057	0.00447302
NW_017189575.1.1.1	1145	324	0.9185	-0.0784483	0.0914964
NW_017189598.1.1.1	800	135	0.7837	-0.0492871	0.0104675
NW_017189629.1.8.1	1493	123	0.837	-0.194302	0.00402673
NW_017189785.1.7.1	470	135	0.9922	-0.36407	0.00259346
NW_017189851.1.13.2	1574	267	0.8499	0.121884	0.138159
NW_017189962.1.3.1	2724	336	0.5183	0.0531842	0.0659923
NW_017190147.1.1.1	390	186	0.9072	0.176085	0.109424
NW_017190157.1.2.1	3125	372	0.5037	-0.163688	0.022691
NW_017191267.1.1.1	1831	135	0.4434	-0.347916	0.000474653
NW_017191829.1.1.1	510	186	0.6802	-0.242018	0.00376721
NW_017195430.1.1.1	1926	351	0.4183	-0.241136	0.00904239
NW_017198746.1.1.1	3509	366	0.7631	0.0239091	0.142168
NW_017200122.1.1.1	1531	156	0.742	-0.0218624	0.013174
NW_017205676.1.2.1	1490	189	0.8351	-0.0210278	0.0251127
NW_017212328.1.1.1	1077	249	1.0455	0.00159703	0.102043
NW_017212534.1.1.1	1869	234	0.602	-0.0597053	0.0150207
NW_017213846.1.1.1	1702	204	0.681	0.0071144	0.0217104
NW_017218788.1.1.1	1639	195	0.7611	-0.00300981	0.0237377
NC_030808.1.107.1	3525	183	0.6426	-0.11915	0.0060595
NC_030808.1.128.1	4645	252	0.6368	-0.102252	0.013013
NC_030808.1.128.3	3311	327	0.9166	-0.229127	0.0324397
NC_030808.1.128.11	3733	240	0.717	-0.00178549	0.0296625
NC_030808.1.128.12	3564	270	0.5394	-0.223497	0.00562439
NC_030808.1.129.1	3783	192	0.5877	-0.195498	0.00335149
NC_030808.1.130.1	1727	180	0.915	-0.276416	0.00545482
NC_030808.1.132.1	3912	225	0.6184	-0.188198	0.00547877
NC_030808.1.173.1	3660	252	0.716	-0.0742011	0.0211477
NC_030808.1.196.1	791	87	0.5503	-0.13753	0.00168664
NC_030808.1.196.2	3160	156	0.5621	-0.338528	0.000848519
NC_030808.1.20.1	3005	258	0.6821	0.0495217	0.0465371
NC_030808.1.250.2	605	132	0.7313	-0.199855	0.00324202
NC_030808.1.266.2	4663	186	0.4793	-0.416095	0.000495049
NC_030808.1.301.1	3244	198	0.4634	-0.455408	0.000450824
NC_030808.1.31.2	3323	186	0.5839	-0.150207	0.00429998
NC_030808.1.31.3	1508	117	0.665	-0.420759	0.000494171
NC_030808.1.341.1	4501	249	0.5408	-0.270219	0.00313177
NC_030808.1.379.1	2864	255	0.5675	-0.314522	0.00299631
NC_030808.1.420.1	1873	162	0.7439	-0.160752	0.0055788
NC_030808.1.430.1	2661	162	0.8707	-0.0364773	0.0177734
NC_030808.1.447.1	659	255	0.6984	-0.031405	0.0325169
NC_030808.1.456.2	570	126	1.1129	0.0319878	0.0447297
NC_030808.1.462.1	1572	222	0.5301	-0.0755025	0.00970748
NC_030808.1.56.1	930	228	0.8634	-0.258963	0.00914533
NC_030808.1.651.1	3825	222	0.4605	-0.3301	0.00127753
NC_030808.1.659.1	1860	123	0.5132	-0.354542	0.000496023
NC_030808.1.676.1	4220	282	0.9674	-0.0174498	0.0847169
NC_030808.1.712.2	2980	156	0.7449	-0.241783	0.00287985
NC_030808.1.75.1	3196	180	0.9747	-0.0849146	0.020979
NC_030808.1.783.1	2612	180	0.6167	-0.469275	0.000569542
[truncated: 747 more rows]

## Sheet: Table S8
Table S8. Statistics of the number of genes in different expression levels
Sample	Expressed_Gene	Total_Gene	0	0~1	1~3	3~15	15~60	>60
BF1	21294	29536	8,242(27.90%)	9,477(32.09%)	3,407(11.54%)	5,259(17.81%)	2,136(7.23%)	1,015(3.43%)
BF2	21768	29536	7,768(26.30%)	9,660(32.71%)	3,411(11.55%)	5,535(18.74%)	2,192(7.42%)	970(3.28%)
BF3	21500	29536	8,036(27.21%)	9,035(30.59%)	3,467(11.74%)	5,725(19.38%)	2,315(7.84%)	958(3.24%)
BF4	21228	29536	8,308(28.13%)	9,436(31.95%)	3,417(11.57%)	5,164(17.48%)	2,226(7.54%)	985(3.33%)
LD1	20776	29536	8,760(29.66%)	9,035(30.59%)	3,307(11.20%)	5,168(17.50%)	2,231(7.55%)	1,035(3.50%)
LD2	21244	29536	8,292(28.07%)	9,217(31.21%)	3,364(11.39%)	5,295(17.93%)	2,296(7.77%)	1,072(3.63%)
LD3	21087	29536	8,449(28.61%)	9,067(30.70%)	3,447(11.67%)	5,315(17.99%)	2,242(7.59%)	1,016(3.44%)
LD4	21462	29536	8,074(27.34%)	9,702(32.85%)	3,402(11.52%)	5,229(17.70%)	2,159(7.31%)	970(3.28%)

## Sheet: Table S9
Table S9. Statistics of the number of genes and isoforms in different expression levels
Sample	Expressed_Isoform	Total_Isoform	0	0~1	1~3	3~15	15~60	>60
BF1	48247	80503	32,256(40.07%)	25,657(31.87%)	10,333(12.84%)	8,714(10.82%)	2,423(3.01%)	1,120(1.39%)
BF2	49313	80503	31,190(38.74%)	25,433(31.59%)	11,099(13.79%)	9,269(11.51%)	2,457(3.05%)	1,055(1.32%)
BF3	49150	80503	31,353(38.95%)	25,055(31.12%)	11,115(13.81%)	9,386(11.66%)	2,545(3.16%)	1,049(1.30%)
BF4	48512	80503	31,991(39.74%)	25,306(31.43%)	10,727(13.32%)	8,928(11.09%)	2,473(3.07%)	1,078(1.35%)
LD1	47826	80503	32,677(40.59%)	24,331(30.22%)	10,539(13.09%)	9,202(11.43%)	2,605(3.24%)	1,149(1.43%)
LD2	48727	80503	31,776(39.47%)	24,680(30.66%)	10,921(13.57%)	9,329(11.59%)	2,634(3.27%)	1,163(1.44%)
LD3	48338	80503	32,165(39.96%)	24,541(30.48%)	10,974(13.63%)	9,099(11.30%)	2,576(3.20%)	1,148(1.43%)
LD4	48431	80503	32,072(39.84%)	25,382(31.53%)	10,715(13.31%)	8,845(10.99%)	2,427(3.01%)	1,062(1.32%)

## Sheet: Table S10
Table S10. Differentially expressed genes between BF and LD
GeneID	BF1_expression	BF2_expression	BF3_expression	BF4_expression	LD1_expression	LD2_expression	LD3_expression	LD4_expression	logFC	Pvalue	FDR
ATCAY	0.08	0.08	0.09	0.07	0	0.01	0	0	-4.40691	0.000825165	0.0402964
SLC4A7	7.65	12.54	12.74	12.5	3.2	3.74	3.78	5.32	-1.4224	5.67704e-11	2.23108e-08
MYH7B	74.73	66.23	106	88.5	19.2	22.83	21.58	20.9	-2.02726	1.72512e-39	1.42374e-35
TASP1	1.84	2.27	2.22	2.23	3.68	6.17	5.84	3.22	1.11376	1.54153e-06	0.000213222
NC_030831.1.7	0.33	0.24	0.44	0.14	3.81	0.37	1.17	1.11	2.52998	0.00011828	0.00890122
EGLN3	91.01	78.91	120.51	110.36	28.18	28.3	61.01	33.53	-1.4289	1.21146e-08	3.06068e-06
NC_030808.1.804	0.91	1.42	2.09	0.9	0.22	0.55	0.54	0.43	-1.57984	9.68445e-05	0.00756395
TENM4	0.59	0.5	0.54	0.65	0.24	0.3	0.17	0.2	-1.40835	5.56388e-07	8.50347e-05
NC_030809.1.819	1.01	1.34	1.43	1.19	4.6	4.46	4.08	3.24	1.75842	1.73025e-14	1.07098e-11
NC_030830.1.357	0.62	1.98	1.46	0.95	0.16	0.79	0.35	0.26	-1.68313	0.00049204	0.0282001
NC_030809.1.780	0.09	0.21	0.3	0.28	0	0.05	0.07	0.05	-2.37131	0.000840554	0.0408064
LDHB	271.56	247.84	176.78	217.34	86.31	109.23	63.71	77.4	-1.43725	1.71024e-13	8.64161e-11
HOXC6	2.58	2.44	3.15	2.37	9.35	10.72	10.7	10.89	1.53679	4.52214e-19	7.46425e-16
NC_030821.1.224	7.68	14.03	11.17	12.5	19.62	25.42	26.39	19.86	1.02407	1.67e-06	0.000228439
GPAM	8	6.85	9.44	9.58	2.77	2.68	6.37	3.64	-1.11212	3.16787e-05	0.00297096
SYN1	5.46	2.58	4.65	3.59	11.63	6.57	10.31	5.82	1.10863	0.00016888	0.0120846
TNNT1	9463.02	7301.85	7618.07	6663.35	2577.55	3389.62	3853.65	2791.96	-1.28928	1.45943e-14	9.26512e-12
LOC108634776	1.09	0.59	1.52	1.53	3.69	4.72	1.72	149.28	5.14773	0.000119106	0.00893618
LOC106502471	8.39	4.01	7.23	7.62	1.84	1.28	1.68	0.73	-2.28587	1.18705e-07	2.28998e-05
S100A1	314.62	158.69	231.92	124.46	59.31	60.34	79.38	57.72	-1.6331	3.74815e-10	1.34494e-07
NC_030820.1.218	1.35	2.1	2.76	2.11	0.3	0.39	0.44	0.44	-2.37408	9.23376e-15	6.01628e-12
GSTK1	35.96	38.39	43.59	37	13.65	21.07	17.25	15.69	-1.1214	6.7207e-14	3.78177e-11
TBX4	0.04	0.15	0.21	0.13	0	0	0	0	-5.22748	0.000224058	0.0151255
NC_030827.1.20	0.03	0.12	0.14	0	0.53	1.24	0.79	0.6	3.4791	2.59023e-09	7.7267e-07
SLC7A8	1.03	1.12	1.35	1.63	6.4	2.24	3.92	2.22	1.59318	1.87667e-06	0.000255299
SKAP1	4.6	3.94	8.46	4.87	13.05	9.19	13.01	9.98	1.06318	2.02749e-05	0.00201632
NC_030825.1.454	0.67	0.69	0.88	0.61	0.03	0.25	0.14	0.06	-2.56787	1.70126e-07	3.00868e-05
HSPB7	200.52	142.96	154.3	166.81	56.25	64.32	62.64	82.1	-1.3416	1.0966e-12	5.1228e-10
LOC108635379	0	0	0	0.44	2.88	7.39	2.12	1.36	4.96414	0.000720724	0.0367926
LBX1	7.86	9.11	8.7	7.53	3.11	4.1	5.03	2.49	-1.11855	1.53247e-07	2.76953e-05
IGF2BP2	0.9	0.72	0.73	0.56	1.58	1.54	1.74	1.23	1.08102	4.90635e-06	0.000592567
TUSC5	3.72	2.18	1.91	1.85	0.58	0.62	1.35	1.44	-1.26	0.00058936	0.0321409
TNNI1	5360.46	3352.78	3675.89	3830.55	1311.42	1799.24	2210.39	1786.08	-1.17009	8.13819e-09	2.12098e-06
LOC108634334	0.6	0.51	0.83	1.23	0	0	0	0	-5.38975	5.77348e-05	0.00487869
ZIC1	0	0	0	0	4.06	4.18	3.28	3.85	11.2409	1.76682e-27	4.86054e-24
NC_030826.1.18	0	0	0	0	0	0	2.13	0	20.2663	2.20829e-09	6.74999e-07
OSR2	0.84	1.05	1.52	0.74	2.42	3.38	4.17	3.36	1.72372	1.04781e-09	3.50577e-07
NC_030823.1.243	0.16	0.17	0.45	0.29	0.02	0.03	0.06	0.06	-2.64629	0.000184292	0.0129384
STXBP5L	0.02	0.08	0.15	0.2	0.27	0.31	0.84	0.42	2.05762	0.000135504	0.00995535
NC_030818.1.402	0.92	1.24	1.33	1.11	5.14	4.22	2.32	1.55	1.53789	7.20243e-05	0.0059048
NC_030809.1.78	0	0	0	0.69	0	0	0	0	-20.9993	5.71293e-10	1.9922e-07
NC_030813.1.47	0.81	1.41	3.47	3.88	0.8	0.68	1.16	0.77	-1.47237	0.000902427	0.0430504
LOC108635296	0.03	0.01	0.02	0.02	0.14	0.08	0.02	0.78	3.90146	0.000697544	0.0359802
NC_030810.1.532	1.05	1.34	3.48	1.83	0.56	0.5	0.67	0.55	-1.73383	1.12968e-06	0.000161675
DGAT2	88.55	85.22	75.82	75.32	17.17	21.39	23.75	23.54	-1.92454	6.39163e-37	3.16501e-33
RAB20	2.48	1.46	2.43	2.07	0.31	0.46	0.61	0.64	-2.05197	4.05353e-08	8.88154e-06
SIM1	0	0	0	0.01	1.4	0.31	0.51	1.12	7.8934	2.0049e-12	9.19245e-10
NC_030822.1.141	0.27	0	0.21	0.25	0	0	0	0	-5.64764	0.000315483	0.0201836
PLCL2	40.36	39.56	33.48	34.13	85.99	85.19	74.91	57.03	1.03733	7.25076e-11	2.80503e-08
TECRL	3.36	4.19	3.19	6.68	1.58	1.9	2.28	1.67	-1.0948	2.64431e-05	0.00251809
NC_030823.1.77	449.77	342.49	413.68	412.23	162.34	191.87	168.66	198.88	-1.15007	4.57042e-16	4.0414e-13
LOC108637115	0	0	0	0	23.51	46.07	9.76	1.39	10.1127	1.40797e-09	4.52725e-07
NC_030813.1.308	1.65	1.77	2.35	1.76	0.6	0.44	0.63	0.43	-1.84139	1.57475e-09	4.99864e-07
C10H15orf41	7.65	6.33	10.85	9.59	4.4	3.69	4.59	4.03	-1.01607	1.83066e-07	3.17224e-05
MAP7	0.2	0.36	0.47	0.17	0.07	0.08	0.09	0.11	-1.76289	0.00107108	0.048748
RHOU	3.44	3.15	1.67	4.42	0.6	0.81	0.47	1.13	-2.06962	5.68024e-09	1.56263e-06
CRYZ	19.31	24.88	24.19	37.97	9.74	12.21	7.8	10.04	-1.40849	8.76522e-10	2.97285e-07
NC_030828.1.396	3.36	3.1	5.35	3.03	8.42	6.92	8.68	6.45	1.06572	4.20281e-07	6.71338e-05
NC_030816.1.387	0.34	0.56	0.58	0.36	0.76	1.38	1.57	0.58	1.23647	0.000514361	0.029142
NC_030812.1.211	6.5	7.08	5.46	6.96	15.25	12.83	13.72	9.88	1.00468	4.76825e-05	0.00415694
OTOG	0.02	0.01	0.06	0.01	0.12	0.08	0.31	0.08	2.67344	0.00023344	0.0156784
FAM221A	0.53	0.4	0.38	0.54	0.04	0	0.08	0.12	-2.97903	0.000442894	0.0261709
LOC102174891	634.33	683.79	722.73	705.42	371.48	290.29	303.41	341.76	-1.04924	1.58104e-15	1.15132e-12
LOC106502520	5.72	2.65	3.72	2.75	1.23	0.89	1.43	0.84	-1.87787	5.53309e-09	1.53925e-06
ACSS1	49.06	27.61	40.3	53.71	13.35	10.65	10.48	13.28	-1.83045	5.28356e-16	4.51089e-13
NC_030812.1.772	0.51	1.44	1.91	0.55	5.08	3.18	5.55	1.09	1.80272	0.00105481	0.0486574
ARG2	2.43	1.97	3.69	3.44	0.8	0.49	0.26	0.9	-2.21211	3.63182e-08	8.10093e-06
NC_030812.1.538	4.28	5.52	3.28	3.4	2.33	0.97	0.96	1.26	-1.55287	3.86949e-05	0.00352223
LOC108635110	0	0	0.05	0	0.2	0.71	0.24	0.17	5.02799	0.000137137	0.0100159
ITGA11	2.75	2.1	2.94	1.43	0.86	1.64	1.02	1.18	-1.06773	0.000243041	0.0162196
LUZP6	0	0	0	0	2.75	0.77	1.04	0	6.15154	8.05703e-05	0.00647675
PAQR9	2.42	2.54	2.48	1.29	0.7	1.28	1.08	0.74	-1.18318	6.95184e-05	0.00575654
BBS2	3.04	4.85	4.9	4.28	1.3	2.52	2.5	2.13	-1.0001	3.74242e-05	0.00341914
COLQ	1.94	1.79	1.85	1.16	0.57	0.69	0.23	0.8	-1.55276	4.85275e-06	0.000588967
IDH2	414.35	291.66	299.42	341.15	120.81	159.33	177.65	181.91	-1.03855	3.63007e-09	1.04508e-06
MRPS6	58.83	34.38	51.85	35.91	20.02	20.99	21.66	16.35	-1.18014	1.01385e-08	2.61477e-06
MYOM3	51.81	51.09	56.95	43.08	18.04	25.71	18.2	22.02	-1.3007	4.40174e-20	9.08189e-17
IGFN1	50.53	35	33.29	34.73	319.83	753.15	239.5	571.89	3.70536	1.0647e-34	4.39347e-31
LOC102181869	4944.4	3350.45	4856.72	3926.26	1229.13	1553.69	1477.77	1417.53	-1.77887	1.1568e-19	2.20317e-16
ZNF367	1.77	2.82	2.73	3.33	5.51	8.4	6.17	3.82	1.12611	2.73778e-06	0.000349406
HOXC9	4.56	2.68	4.15	3.36	7.78	8.55	8.01	7.34	1.11708	2.88766e-08	6.68183e-06
RGS2	26.89	21.44	25.53	34.58	4.15	1.08	2.41	4.61	-3.14867	1.78163e-18	2.45063e-15
LOC108634753	13.07	8.59	9.13	6.6	24.9	24.42	18.55	17.39	1.20574	2.18092e-08	5.24247e-06
UCP3	59.44	72.83	93.27	60.39	120.27	152.92	212.95	91.83	1.02871	3.27183e-05	0.00304539
NC_030814.1.317	2.76	1.9	2.23	1.72	1.23	0.54	0.83	0.45	-1.48071	3.26161e-06	0.000414124
ACSF2	33.32	24.03	24.18	23.65	8.89	10.4	9.46	10.03	-1.42564	7.2705e-18	8.18228e-15
ADIG	1.48	1.76	1.13	2.41	3.33	5.31	7.67	3.02	1.10975	0.000940532	0.0445383
NC_030809.1.203	0.57	0.72	0.71	0.97	1.92	1.47	1.18	1.55	1.07344	0.000191497	0.0132718
NC_030815.1.565	37.9	41.62	37.06	53.01	8.61	15.72	7.62	9.91	-2.01665	9.45611e-19	1.46327e-15
NW_017189517.1.111	0	0	0.85	0	0	0	0	0	-20.8915	7.03193e-10	2.41811e-07
RALGAPA2	1.02	0.98	1.07	0.97	0.29	0.35	0.38	0.45	-1.26685	4.82915e-08	1.03969e-05
NC_030812.1.191	1.09	1.69	1.47	1.85	0.38	0.34	0.31	0.24	-2.27477	5.53206e-16	4.56561e-13
MYL2	13364.9	10414.4	11816.8	10541.6	1511.9	1621.93	2641.01	1405.49	-2.65641	9.81896e-38	6.07769e-34
ANKRD1	106.58	160.73	89.73	275.35	580.36	363.86	283.36	564.14	1.49037	1.1181e-05	0.00120361
LOC108638109	2.78	1.87	2.09	2.8	0.64	0.79	0.41	0.31	-2.15036	6.74673e-09	1.81568e-06
B3GALT1	0.95	0.78	2.01	1.87	0.28	0.3	0.55	0.34	-2.05401	1.11846e-07	2.21536e-05
MYL6B	2054.14	362.63	1093.42	1061.15	184.68	80.04	65.2	31.44	-3.63562	1.83219e-07	3.17224e-05
SH3RF2	0.96	0.82	0.89	0.71	3.09	1.81	2.03	1.68	1.32908	4.40741e-07	6.95052e-05
PDK3	5.33	4.77	6.8	5.67	2.77	2.73	2.52	2.54	-1.10721	2.25322e-10	8.20403e-08
PRKAG3	8.41	8.58	15.36	17.91	31.6	23.99	39.2	36.98	1.41046	2.22811e-08	5.30441e-06
SLC16A7	6.38	4.33	4.59	8.82	1.64	0.85	1	1.14	-2.47328	9.90081e-18	1.0658e-14
NC_030826.1.665	0	0	0	0	2.79	0	0	0	20.5811	1.22937e-09	4.05838e-07
ANKRD2	106.78	67.54	105.91	77.94	24.35	25.93	16.03	28.53	-1.87772	2.08007e-17	2.06002e-14
EYA1	0.75	1.05	0.73	1.3	0.23	0.36	0.2	0.12	-2.08495	2.73759e-08	6.39435e-06
LOC108634098	5	6.68	4.35	9.45	22.29	22.13	12.87	14.65	1.50294	3.51596e-07	5.72709e-05
IL17D	2.68	0.77	1.16	1.96	0.26	1.29	0.56	0.41	-1.36294	2.35086e-06	0.000309601
PITX1	13.58	7.82	12.48	18.53	0.65	0.25	0.49	0.53	-4.75814	7.68069e-46	9.50831e-42
HOXD9	5.12	4.04	5.89	4.72	13.05	17.19	13.74	13.56	1.5557	1.76008e-22	3.96163e-19
NC_030836.1.180	18.63	10.84	14.77	13.72	44.6	22.39	30.86	16.74	1.01262	0.00108745	0.0492216
SBK2	1.74	1.06	2.12	1.05	0.17	0.22	0.33	0.11	-2.83455	9.64247e-07	0.000140434
SLC22A3	4.99	1.1	1.19	3.88	1.37	0.78	0.66	0.57	-1.77855	0.000234299	0.0156784
NC_030811.1.14	1.74	5.46	1.97	3.81	6.93	12.33	5.7	5.58	1.23342	0.000206127	0.0140981
PRRX1	5.1	6.62	8.22	7.55	2.91	2.34	2.2	2.26	-1.4783	1.14231e-15	8.83826e-13
TPM3	3797.37	3563.32	3291.44	3472.64	923.02	1642.13	1519.66	1228.96	-1.38961	2.43805e-15	1.72467e-12
CSRNP3	0.75	0.91	0.6	0.75	0.25	0.4	0.25	0.3	-1.19014	5.1864e-07	7.97579e-05
FABP3	583.9	1276.9	1298.84	918.02	171.36	376.81	423.25	219.52	-1.74832	5.107e-12	2.18007e-09
LOC108634577	0.34	0.19	0.34	0.21	1.4	1.53	0.53	9.37	3.61176	4.28912e-05	0.00380625
CA3	1008.45	584.21	1026.02	1113.39	160.89	129.77	335.77	173.26	-2.20579	6.46095e-14	3.72015e-11
VSTM2L	2.66	2.83	1.74	3.12	6.81	10.27	4.8	9.67	1.61577	1.25218e-08	3.1316e-06
NC_030823.1.291	0.34	0.79	0.46	0.53	1.11	0.72	1.37	1.63	1.24117	0.000799559	0.0394159
LOC108634775	2.61	2.3	1.6	6.8	4.85	4.19	2.67	423.5	5.08209	0.000987509	0.0463063
PPP1R1B	3.12	3.27	2.75	2.5	1.08	0.9	2.26	1.47	-1.00496	0.001098	0.0495638
NC_030816.1.52	1.74	1.98	0.94	0.97	0.61	0.27	0.23	0.41	-1.86473	2.01724e-06	0.000271439
LOC102181510	21.5	22.77	22.22	29.04	10.2	8.61	7.36	8.23	-1.35498	1.32346e-11	5.55381e-09
SEL1L3	0.59	0.95	0.73	0.97	1.71	2.2	1.82	2.17	1.27957	1.08678e-08	2.77398e-06
RSPO3	3.71	3.05	4.07	3.62	1.58	0.73	1.8	0.87	-1.53066	5.12164e-07	7.92542e-05
ME3	9.11	11.25	8.16	11.4	2.88	5.58	4.19	4.88	-1.17716	1.42623e-07	2.6157e-05
ZNF385B	2.38	1.94	3.71	3.87	0.83	0.4	0.5	0.77	-2.13477	2.42725e-13	1.20193e-10
NC_030815.1.551	0.47	0.76	0.78	0.41	1.55	2.04	2.3	0.51	1.41536	0.000670779	0.0349638
RCAN2	6.36	6.06	7.19	7.22	1.1	1.88	0.98	0.91	-2.48981	3.17888e-28	9.83824e-25
BICC1	1.98	1.8	4.04	2.97	1.39	1.21	1.29	1.35	-1.01183	5.62986e-05	0.00480654
TMC7	1.25	1.2	1.53	1.93	0.61	0.45	0.69	0.68	-1.26851	1.3918e-06	0.000193593
SLC16A1	34.63	24.69	40.31	40.75	11.81	12.22	13.46	15	-1.37675	1.46745e-13	7.56929e-11
ESRRB	3.92	2.64	3.37	3.26	0.77	1.06	0.5	0.88	-2.02883	3.06662e-18	3.61555e-15
LOC106502753	3.97	2.75	3.86	2.93	1.74	1.31	1.99	0.75	-1.24921	0.000791154	0.0392549
LOC106502489	16.77	13.24	23.05	16.47	49.85	39.32	42.59	19.49	1.15394	2.93713e-05	0.00277558
TFCP2L1	0.55	0.45	0.31	0.6	0	0.01	0	0.01	-7.4136	3.5148e-12	1.55398e-09
NC_030820.1.123	0.21	0.98	0.39	0.92	4.99	4.04	2.03	2.45	2.45334	4.24544e-08	9.22043e-06
SNCG	2.65	1.49	2.39	1.96	1.18	0.48	1.04	0.88	-1.22135	0.000511237	0.0290314
PAK6	0.24	0.27	0.08	0.14	0.33	0.76	0.32	0.95	1.77949	0.000539609	0.0302266
LGI1	3.53	3.3	2.54	4.68	0.96	0.87	1.06	1.49	-1.67055	4.8644e-09	1.36861e-06
PADI2	5.42	1.85	4.62	1.56	105.64	99.16	100.43	90.73	4.96119	6.434e-48	1.59299e-43
RAP1GAP2	1.11	0.98	1.3	1.03	0.5	0.55	0.43	0.26	-1.3693	3.32957e-06	0.000418461
ENPP5	4.64	3.44	11.53	5.54	1.93	2.78	2.92	1.72	-1.34607	6.43195e-05	0.00536191
LPL	117.46	58.92	68.37	119.15	41.89	16	19.79	34.52	-1.67294	3.34332e-07	5.55548e-05
NC_030821.1.179	3.43	1.77	1.49	4.05	7.87	7.83	5.2	5.52	1.30808	0.000405297	0.0244998
GRB14	0.78	0.55	1.19	0.7	0.35	0.07	0.25	0.1	-1.93535	0.000276121	0.0178965
LOC108638636	1.52	1.1	0.97	1.38	0.46	0.6	0.62	0.32	-1.3111	0.000136406	0.00999195
NC_030822.1.265	0	0	0	0	0	2.49	0	0	20.2541	2.25828e-09	6.81863e-07
KCNH2	0.54	0.72	1.68	1.04	0.08	0.21	0.41	0.27	-1.99689	1.88444e-05	0.00189662
ACOT11	9.41	6.63	10.77	7.14	3.23	1.71	4.9	1.76	-1.52828	1.98687e-06	0.000268813
ABLIM1	18.79	14.89	31.07	22.26	10.85	9.74	11.08	12.02	-1.00735	2.19697e-06	0.000292445
NC_030828.1.384	0	0	0	0	0.1	0.12	0.23	0.33	4.99975	0.000648605	0.0343175
GREB1	0.11	0.07	0.21	0.15	0.38	0.23	0.41	0.52	1.51986	0.000150807	0.0108858
F10	16.04	19.74	12.52	15.12	4.68	8.73	5.66	10.45	-1.09193	3.20215e-05	0.00299178
KCNS3	4.24	3.45	5.01	6.19	17.93	8.72	16.76	13.73	1.62211	1.3769e-09	4.48561e-07
WNT5B	0.9	1.07	0.6	1.09	0.32	0.53	0.17	0.31	-1.44719	0.00031885	0.0203464
NC_030812.1.685	2.03	5.22	2.4	2.94	0.74	1.02	0.41	1.28	-1.83998	4.73188e-06	0.000577126
MYOZ2	604.48	526.55	803.58	824.49	179.28	208.01	338.79	129.22	-1.6876	1.30011e-10	4.95221e-08
NRG4	7.56	3.43	3.82	4.5	12.86	12.01	10.53	9.95	1.22074	2.96337e-05	0.00278974
ABCG4	0.09	0.16	0.17	0.16	0.63	0.66	0.27	0.73	2.00154	1.17153e-05	0.00125025
CFAP52	0.71	1.32	0.81	1.37	3.35	3.23	3.84	2.3	1.60767	3.89749e-08	8.61589e-06
CCDC190	1.06	1.37	0.44	1.02	1.68	2.92	2.41	2.64	1.12671	0.00109929	0.0495638
LMCD1	195.27	164.76	144.87	161.2	54.32	78.27	51.28	75.73	-1.32668	8.83038e-13	4.20445e-10
SIM2	5.27	5.22	5.44	5.99	0.34	0.08	1	0.22	-3.76056	8.77624e-08	1.76867e-05
LOC108634845	2.66	3.88	3.17	8.83	7.05	6.62	3.95	574.41	5.05555	0.000815205	0.0399677
HOXC8	0.49	0.99	0.92	0.87	3.13	4.79	3.93	3.35	2.23403	2.06418e-18	2.55535e-15
BDH1	34.68	5.32	7.03	9.07	1.2	0.91	1.16	1.06	-3.69866	1.96321e-08	4.7654e-06
NC_030809.1.598	0.28	0.19	0.16	0.49	0.03	0	0	0	-5.30189	9.23366e-06	0.00102061
NC_030810.1.929	25.97	24.35	40.22	32.33	6.96	16.3	17.12	10.77	-1.36289	4.92395e-08	1.05097e-05
PITX3	3.35	1.65	2.56	2.19	4.23	8.63	3.62	13.87	1.56456	9.65752e-05	0.00756395
NC_030810.1.633	8.15	7.08	9.97	5.95	3.48	2.83	5.41	2.09	-1.1556	8.84407e-05	0.00701828
KCNJ5	0.31	0.31	0.2	0.16	0.07	0	0	0	-3.85375	0.000569021	0.0312381
VAV2	2.01	2.34	2.65	2.23	1.01	1.26	1.22	1.08	-1.00014	1.8876e-09	5.84188e-07
MYL3	2483.95	1133.06	1718.08	1578.88	31.9	1.33	20.08	5.25	-6.86021	2.66933e-15	1.83583e-12
PDLIM1	230.48	249.31	284.27	220.75	64.11	100.35	130.51	96.79	-1.3276	4.26508e-12	1.85262e-09
PROX1	3.63	2.67	4.14	8	1.31	1.21	1.43	1.82	-1.66212	1.94134e-07	3.33788e-05
PFKFB4	58.88	36.56	44.7	64.87	145.74	75.11	67.07	137.91	1.07281	0.000250172	0.0165615
LOC106502478	22.61	24.76	25.34	26.63	1.8	0.67	4.46	1.16	-3.53562	4.86963e-10	1.72239e-07
FHL2	9.48	11.84	29.57	16.79	2.23	1.61	2.67	1.34	-3.03692	2.00077e-18	2.55535e-15
EPHX2	12.81	10.48	13.64	14.26	5	5.14	5.51	4.75	-1.25941	9.05495e-16	7.23198e-13
SLC2A11	0.25	0.31	0.3	0.24	0.64	0.68	0.67	0.44	1.19875	0.00102603	0.047751
TNNI3	28.31	29.95	22.88	32.37	12.58	12.93	15.35	15.13	-1.03812	3.15374e-07	5.27591e-05
LOC108634770	0.12	0	0.27	0.09	0.92	1.3	0.42	4.79	4.17176	0.00017837	0.012654
TNNC2	7235.56	10528.7	8205.19	9444.88	18946.9	20523	18794.2	16913.9	1.11448	3.74825e-16	3.43715e-13
AQP7	28.33	28.27	32.88	32.72	3.53	10.6	7.05	10.33	-2.00936	2.61424e-13	1.26914e-10
CASQ2	13.82	5.7	19.39	9.96	4.29	3.9	3.17	3.88	-1.65685	6.23484e-08	1.27577e-05
TWF2	127.33	143.76	149.47	93.57	57.49	54.65	49.14	48.62	-1.26705	1.63842e-16	1.56022e-13
FGF9	0.59	1.31	0.74	1.06	0.05	0.26	0.12	0.27	-2.38417	2.36026e-07	4.03018e-05
LOC102184663	1388.85	1717.55	1625.55	1283.81	334.06	629.59	688.76	392.32	-1.56066	1.40016e-13	7.37588e-11
SLC6A6	1.26	0.55	0.86	0.85	0.15	0.24	0.39	0.22	-1.83115	3.43831e-07	5.63769e-05
CRYBG3	10.67	6.09	8.33	14.09	5.31	4.42	4.39	5.2	-1.12373	6.21663e-06	0.000729467
NC_030812.1.190	1.67	1.51	1.42	2.6	0.34	0.38	0.45	0.26	-2.33327	2.45283e-12	1.10417e-09
ZIC4	0	0	0	0	0.75	0.62	0.22	0.25	7.67649	4.14542e-11	1.65543e-08
ACTN3	39.48	67.27	63.98	53	132.65	219.75	111.06	97.95	1.01954	5.14125e-08	1.07875e-05
CPNE9	0.07	0.18	0.21	0.23	0.7	0.52	0.79	0.33	1.80687	0.000648676	0.0343175
FGF1	1.76	2.69	2.4	2.96	0.85	1.4	0.92	1.31	-1.11521	4.9705e-06	0.000597401
TMEM120A	51.13	117.49	111.92	83.94	21.11	41.82	50.07	40.73	-1.1938	1.09644e-05	0.00119065
PLIN3	10.99	8.86	12.55	11.73	2.85	5.52	5.44	5.29	-1.19349	1.5633e-07	2.80476e-05
ABCA7	0.18	0.39	0.49	0.35	1.11	0.66	0.63	0.57	1.11511	0.000125251	0.00928084
NC_030825.1.277	7.21	6.38	5.89	5.73	21.91	18.98	15.59	9.93	1.41591	2.09484e-11	8.64437e-09
XPO4	21.01	21.89	29.04	23.93	7.31	8.02	8.66	7.03	-1.39479	1.90694e-28	6.74484e-25
SLC25A13	3.58	2.18	3.35	3.26	1.01	1.6	1.48	1.32	-1.18488	4.37728e-07	6.94725e-05
MYLK4	6.04	5.74	3.35	3.4	1.38	1.68	1.44	1.93	-1.49404	9.65747e-08	1.9283e-05
HOXD8	12.67	16.67	12.86	17.87	36.66	43.52	30.67	24.86	1.08911	3.24155e-09	9.55448e-07
ZNF750	0.57	0.54	0.45	0.37	0.01	0.1	0	0.03	-3.73019	7.70282e-09	2.02887e-06
TPM1	5647.66	12082.8	7551.68	8600.38	17570.8	19741.6	17219.1	16186.9	1.07253	1.36154e-07	2.5498e-05
BARX2	1.45	2.94	2.7	2.39	0.68	1.23	0.85	0.38	-1.58456	8.32621e-07	0.000122708
LOC102183132	5.09	4.61	6.58	4.71	1.62	1.93	2.1	2.7	-1.3083	4.59641e-05	0.00404991
TNNC1	17964.1	16747.9	15922.1	14405.1	4253.87	6428.31	7966.19	5353.21	-1.41667	1.89731e-14	1.14574e-11
MAP2	1.84	2.42	0.97	1.43	0.57	0.99	0.66	0.79	-1.3599	1.20339e-05	0.00127328
LOC108635183	0	0	0	0.08	0.49	0.38	0.04	0.67	4.38827	0.000134663	0.00992299
TLE2	4.89	3.96	5.38	4	1.52	2.27	2.02	2.63	-1.1017	3.09333e-07	5.21005e-05
ZIC3	0.04	0	0	0	3.27	1.06	1.09	2.52	8.15713	1.08085e-13	5.81757e-11
LOC102171344	15	19.59	18.76	30.85	63.84	41.07	40.26	39.96	1.07163	4.06809e-05	0.00367598
LINGO1	46.91	35.45	43.42	40.27	93.77	85.4	97.37	78.81	1.10648	3.35211e-15	2.24311e-12
CKB	17.01	14.01	9.35	7.99	4.57	6.76	5.85	6.36	-1.02703	7.87722e-05	0.0063736
KIF26B	0.4	0.24	0.38	0.33	0.13	0.12	0.09	0.2	-1.46343	1.10981e-05	0.0011999
SLC45A3	0.72	0.69	1.16	0.93	0.31	0.34	0.44	0.56	-1.07422	0.000476308	0.027616
HOXC11	2.28	3.9	3.98	3.78	0.81	0.56	0.83	0.91	-2.13827	3.41398e-14	2.01254e-11
MYH15	0.03	0.07	0.09	0.07	0.01	0	0	0.01	-3.70868	0.00074753	0.0376947
HS3ST2	4.16	2.97	3.56	2.44	0.25	0.11	0.44	0.28	-3.58254	1.96194e-23	4.85758e-20
LOC108635081	0	1.31	1.16	0.57	1.11	1.48	3.18	562.71	7.65324	0.00020072	0.0137963
SHISA7	1.21	1.87	1.59	1.69	0.52	0.94	0.63	0.87	-1.12583	6.43003e-06	0.000750948
GPR75	0.19	0.18	0.34	0.61	0.06	0.06	0.01	0.1	-2.61963	4.21224e-05	0.00376502
LOC102181962	9.22	10.87	14.62	13.82	4.89	7.36	5.86	5.79	-1.01311	1.15091e-07	2.24596e-05
NC_030833.1.267	0.7	0.45	3.19	1.48	0.35	0.16	0.23	0.31	-2.42691	1.27576e-05	0.00133842
TBX18	0.51	0.49	0.61	0.39	2.67	2.35	2.79	1.97	2.32764	3.19969e-19	5.65865e-16
GPAT3	9.64	5.87	8.96	8.89	5.26	2.48	4.48	3.9	-1.00451	0.000116498	0.008802
VWA2	0.25	0.04	0.12	0.12	0.29	0.45	0.84	0.95	2.32155	1.1293e-05	0.00121041
TMEM233	19.27	23.11	14.63	26.19	60.31	49.08	27.82	40.33	1.10802	2.07648e-05	0.00205646

[truncated: 3 more sheets: Table S11, Table S12, Table S13]
